# Supplementary material for: Three new coordination geometries of homoleptic Zn complexes of curcuminoids and their high antiproliferative potential
Source: Royal Society of Chemistry journal article supplement (doi:10.1039/d3ra00167a), 2023-01-01
Supplement: d3ra00167a1.pdf [file d3ra00167a1.pdf]

## The supplementary file

### Three new coordination geometries of homoleptic Zn complexes of curcuminoids and their high antiproliferative potential

William Meza-Morales,<sup>a,b</sup> Yair Álvarez-Ricardo,<sup>a</sup> Marco A. Obregón-Mendoza,<sup>a</sup> Antonino Arenaza-Corona,<sup>a</sup> María Teresa Ramírez-Apan,<sup>a</sup> Rubén A. Toscano,<sup>a</sup> Juan Carlos Poveda-Jaramillo,<sup>c</sup> and Raúl G. Enríquez <sup>\*a</sup>

<sup>a</sup> Instituto de Química, Universidad Nacional Autónoma de México, Circuito Exterior, Ciudad Universitaria, México City, C.P. 07340, México.

<sup>b</sup> Department of Chemical Engineering, University of Puerto Rico-Mayaguez, Route 108, Mayaguez, Puerto Rico, USA

<sup>c</sup> Laboratorio de Resonancia Magnética Nuclear, Universidad Industrial de Santander, Sede Guatiguará Km. 2 vía El Refugio, 681011 Piedecuesta, Santander, Colombia.

**Table S1.** Crystallographic data of compounds.

|                                             | 5a                                                                         | 5b                                                            | 7                                                                 | 8                                                                 |
|---------------------------------------------|----------------------------------------------------------------------------|---------------------------------------------------------------|-------------------------------------------------------------------|-------------------------------------------------------------------|
| Empirical formula                           | C <sub>54.96</sub> H <sub>57.58</sub> N <sub>1.65</sub> O <sub>18</sub> Zn | C <sub>52</sub> H <sub>52</sub> O <sub>17</sub> SZn           | C <sub>51</sub> H <sub>60</sub> N <sub>2</sub> O <sub>13</sub> Zn | C <sub>79</sub> H <sub>77</sub> N <sub>3</sub> O <sub>22</sub> Zn |
| Formula weight                              | 1094.72                                                                    | 1046.36                                                       | 974.38                                                            | 1485.80                                                           |
| Temperature/K                               | 298(2)                                                                     | 296(2)                                                        | 298(2)                                                            | 100(2)                                                            |
| Crystal system                              | triclinic                                                                  | triclinic                                                     | Monoclinic                                                        | triclinic                                                         |
| Space group                                 | P-1                                                                        | P-1                                                           | C2/c                                                              | P-1                                                               |
| a/Å                                         | 7.7998(19)                                                                 | 7.4706(2)                                                     | 31.514(8)                                                         | 10.5643(5)                                                        |
| b/Å                                         | 11.640(3)                                                                  | 11.7637(4)                                                    | 17.306(5)                                                         | 12.4244(5)                                                        |
| c/Å                                         | 15.758(4)                                                                  | 30.7699(10)                                                   | 10.282(3)                                                         | 30.5143(14)                                                       |
| α/°                                         | 76.704(8)                                                                  | 81.6770(10)                                                   | 90                                                                | 91.7948(10)                                                       |
| β/°                                         | 88.171(7)                                                                  | 86.8260(10)                                                   | 98.828(8)                                                         | 92.0579(10)                                                       |
| γ/°                                         | 79.407(8)                                                                  | 79.6230(10)                                                   | 90                                                                | 114.7808(9)                                                       |
| Volume/Å <sup>3</sup>                       | 1368.5(6)                                                                  | 2630.68(14)                                                   | 5541(3)                                                           | 3629.3(3)                                                         |
| Z                                           | 1                                                                          | 2                                                             | 4                                                                 | 2                                                                 |
| ρ <sub>calc</sub> /cm <sup>3</sup>          | 1.328                                                                      | 1.321                                                         | 1.168                                                             | 1.360                                                             |
| μ/mm <sup>-1</sup>                          | 0.522                                                                      | 0.576                                                         | 0.501                                                             | 0.418                                                             |
| F(000)                                      | 573.0                                                                      | 1092.0                                                        | 2056.0                                                            | 1556.0                                                            |
| Crystal size/mm <sup>3</sup>                | 0.399 × 0.231 × 0.16                                                       | 0.202 × 0.175 × 0.043                                         | 0.34 × 0.264 × 0.2                                                | 0.173 × 0.11 × 0.041                                              |
| Radiation                                   | MoKα (λ = 0.71073)                                                         | MoKα (λ = 0.71073)                                            | MoKα (λ = 0.71073)                                                | MoKα (λ = 0.71073)                                                |
| 2θ range for data collection/°              | 4.986 to 51.362                                                            | 4.146 to 50.71                                                | 4.576 to 52.042                                                   | 1.338 to 52.744                                                   |
| Index ranges                                | -9 ≤ h ≤ 9, -14 ≤ k ≤ 14, -19 ≤ l ≤ 19                                     | -8 ≤ h ≤ 8, -14 ≤ k ≤ 14, -36 ≤ l ≤ 37                        | -38 ≤ h ≤ 38, -21 ≤ k ≤ 21, -12 ≤ l ≤ 12                          | -13 ≤ h ≤ 13, -15 ≤ k ≤ 15, -38 ≤ l ≤ 38                          |
| Reflections collected                       | 28466                                                                      | 43039                                                         | 21277                                                             | 62044                                                             |
| Independent reflections                     | 5180 [R <sub>int</sub> = 0.0732, R <sub>sigma</sub> = 0.0505]              | 9550 [R <sub>int</sub> = 0.0736, R <sub>sigma</sub> = 0.0594] | 5445 [R <sub>int</sub> = 0.0717, R <sub>sigma</sub> = 0.0789]     | 14846 [R <sub>int</sub> = 0.0399, R <sub>sigma</sub> = 0.0336]    |
| Data/restraints/parameters                  | 5180/66/392                                                                | 9550/90/676                                                   | 5445/232/387                                                      | 14846/462/1104                                                    |
| Goodness-of-fit on F <sup>2</sup>           | 1.020                                                                      | 1.054                                                         | 0.995                                                             | 1.051                                                             |
| Final R indexes [I ≥ 2σ (I)]                | R <sub>1</sub> = 0.0818, wR <sub>2</sub> = 0.2106                          | R <sub>1</sub> = 0.0685, wR <sub>2</sub> = 0.1517             | R <sub>1</sub> = 0.0779, wR <sub>2</sub> = 0.2045                 | R <sub>1</sub> = 0.0470, wR <sub>2</sub> = 0.1096                 |
| Final R indexes [all data]                  | R <sub>1</sub> = 0.1254, wR <sub>2</sub> = 0.2448                          | R <sub>1</sub> = 0.1073, wR <sub>2</sub> = 0.1714             | R <sub>1</sub> = 0.1649, wR <sub>2</sub> = 0.2588                 | R <sub>1</sub> = 0.0614, wR <sub>2</sub> = 0.1176                 |
| Largest diff. peak/hole / e Å <sup>-3</sup> | 0.41/-0.46                                                                 | 1.35/-0.49                                                    | 0.48/-0.23                                                        | 0.68/-0.67                                                        |

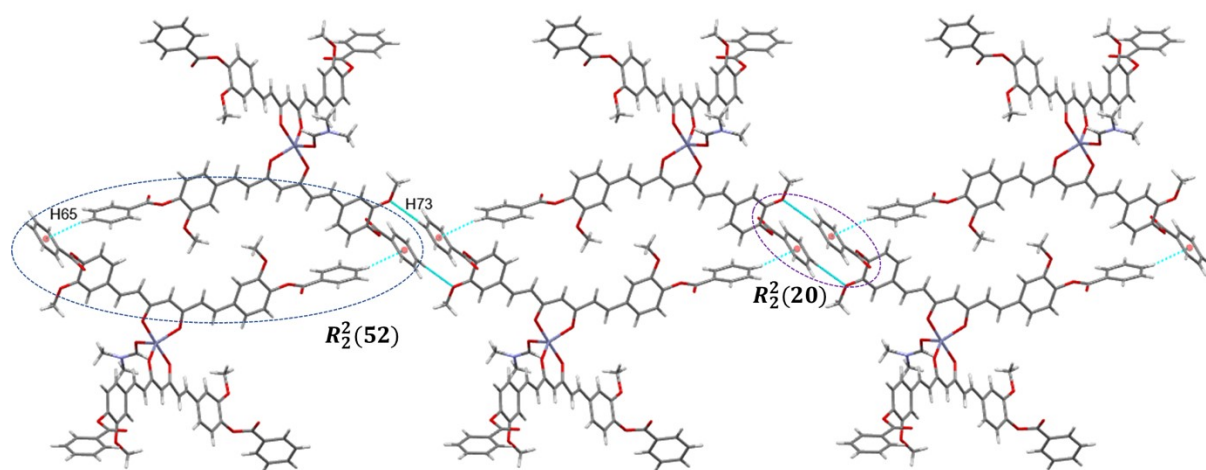

**Fig S1.** 2D supramolecular interactions for compound 7 supported via by C-H $\cdots$ O and C-H $\cdots$  $\pi$  interactions forming rings of 20 and 52 members  $R_2^2(20)$  and  $R_2^2(52)$ .

**Table S2.** Contribution of different types of contacts.

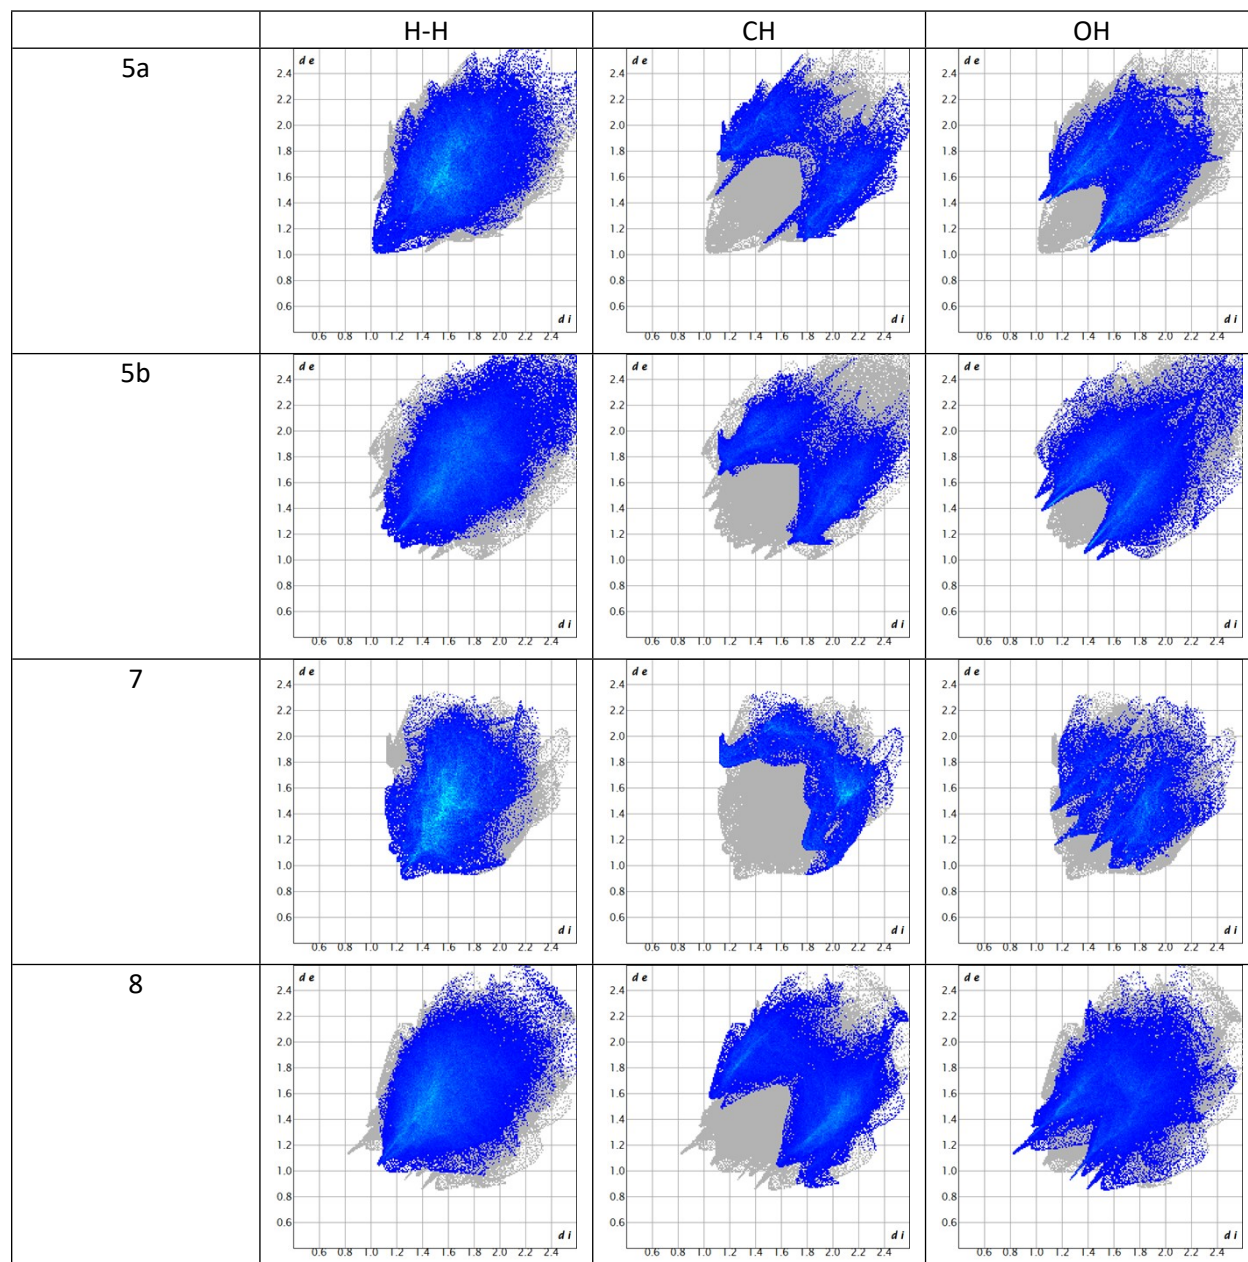

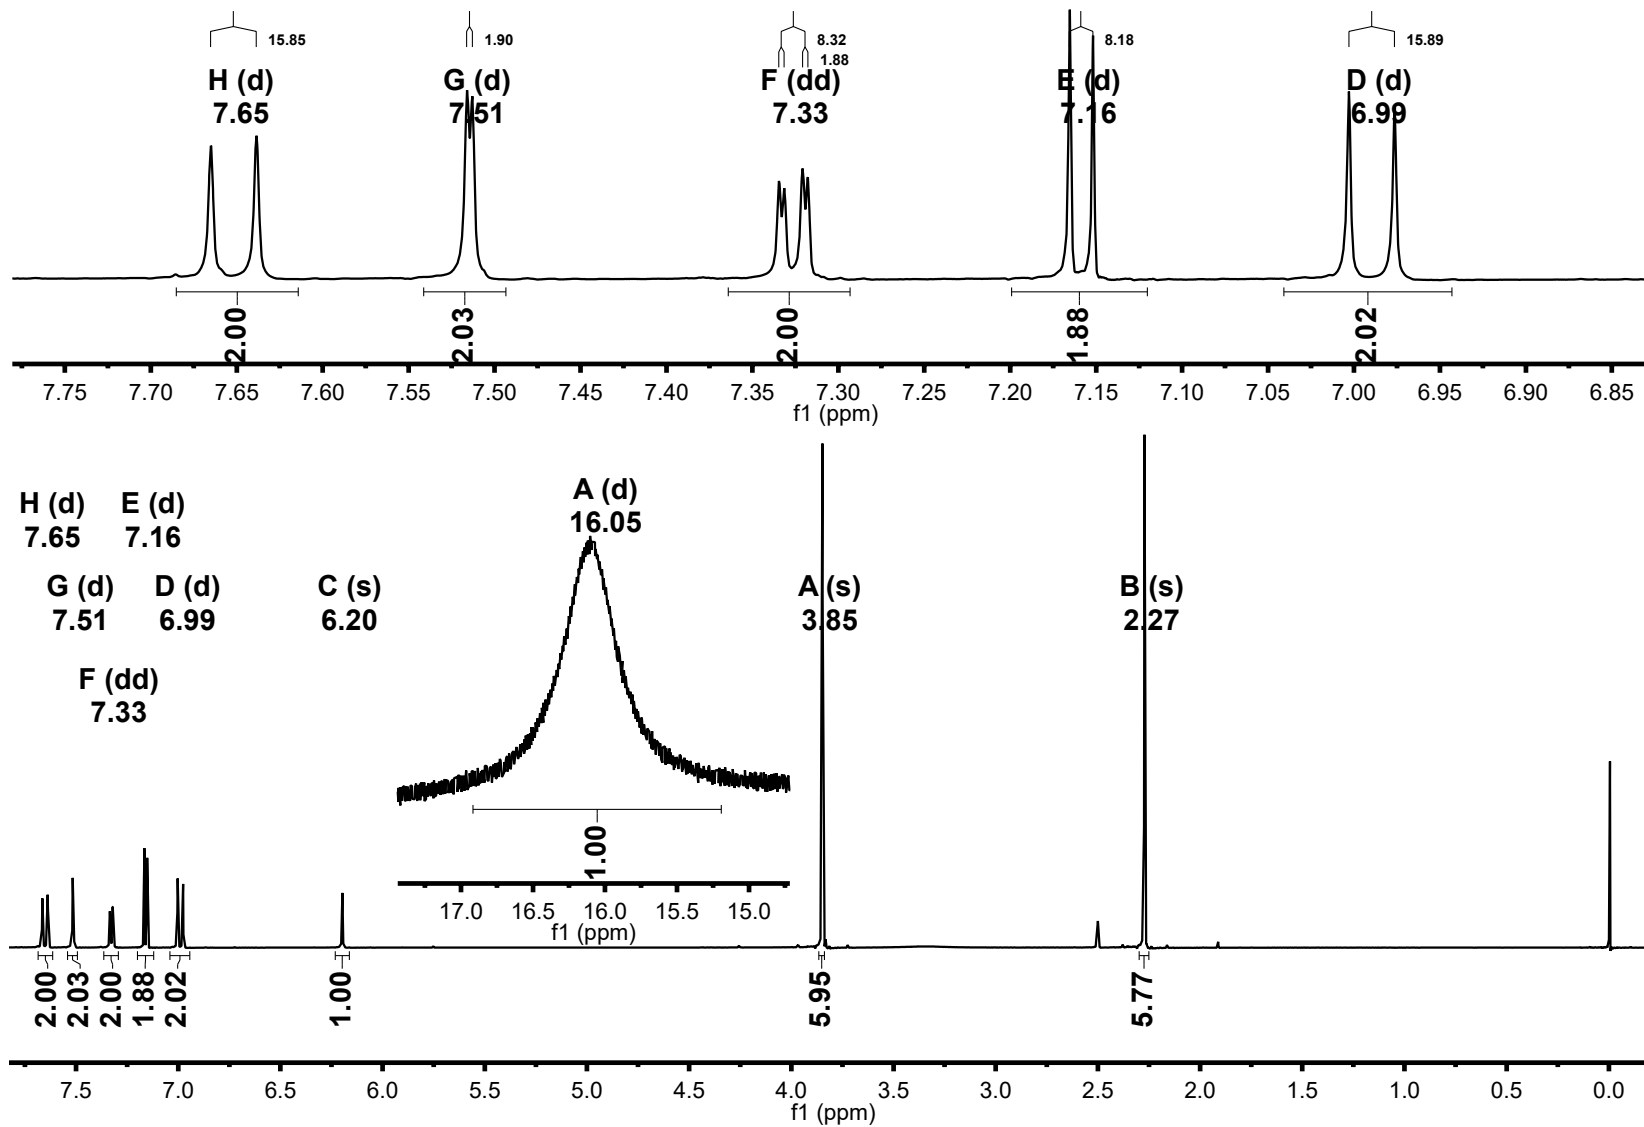

Fig S2. 500 MHz <sup>1</sup>H NMR spectrum of DAC.

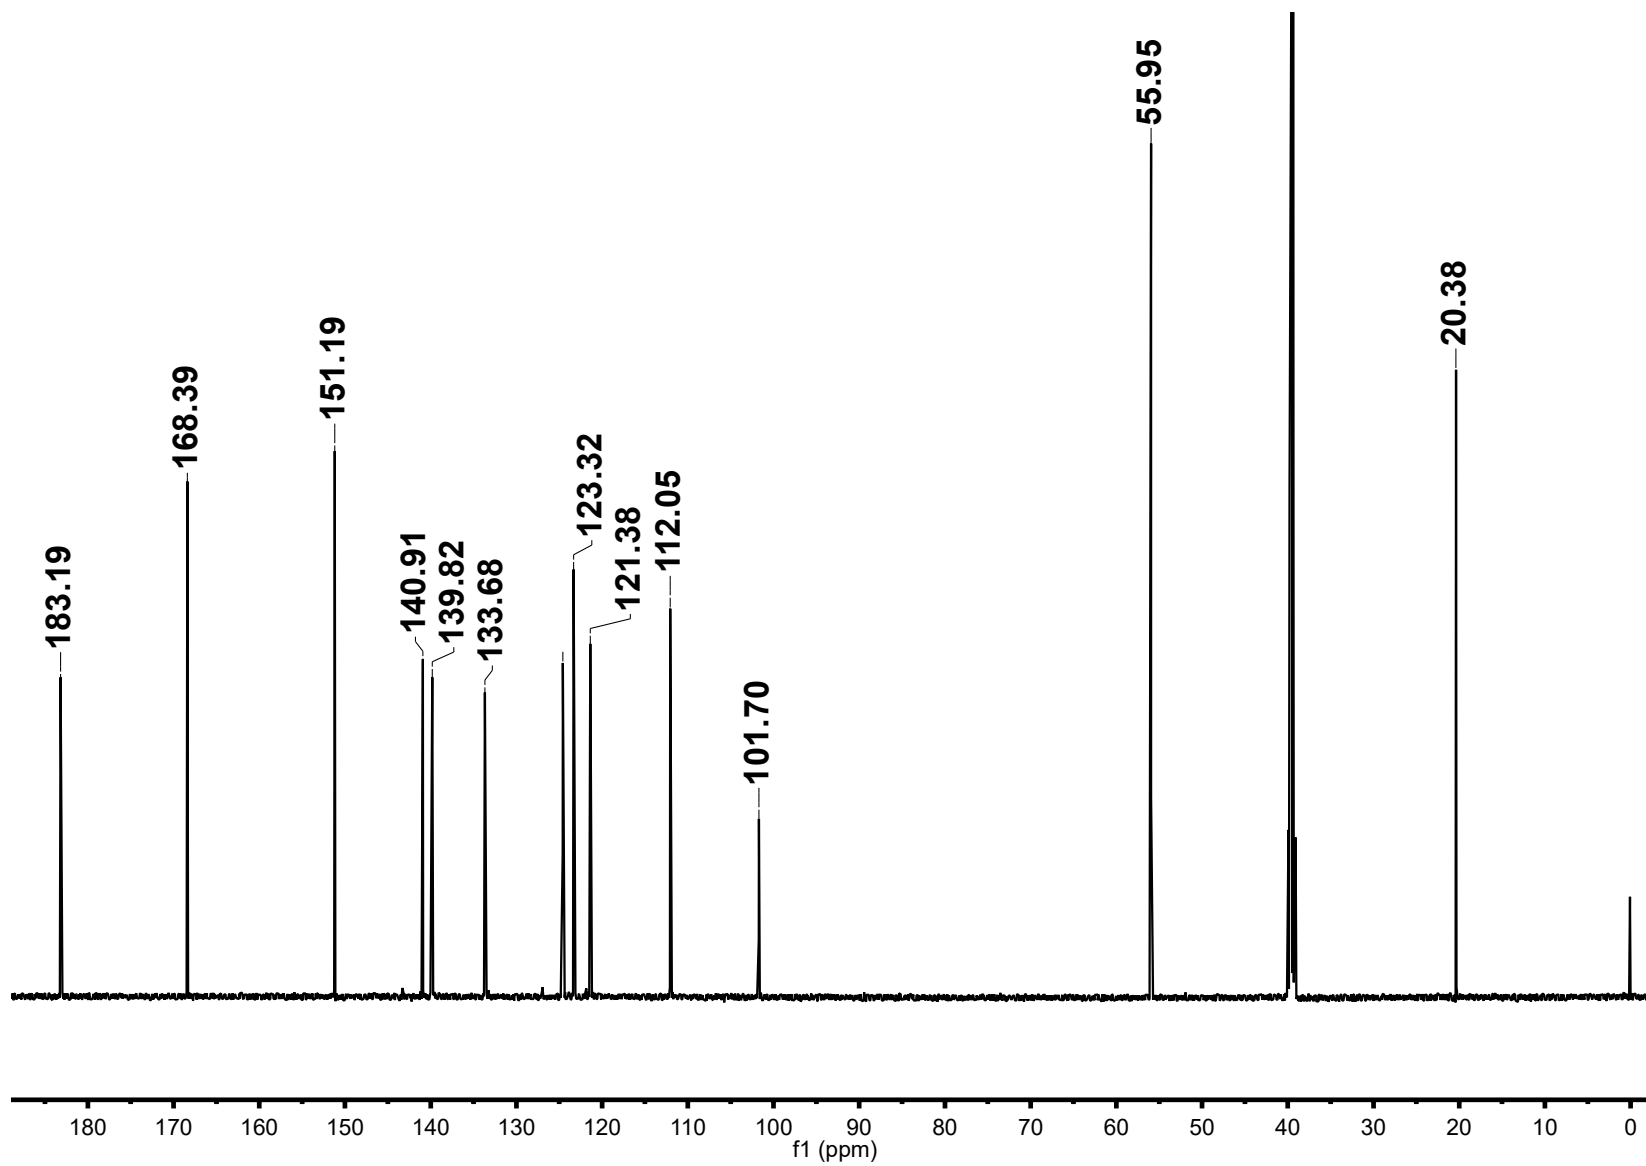

Fig S3. 125 MHz <sup>13</sup>C NMR spectrum of DAC.

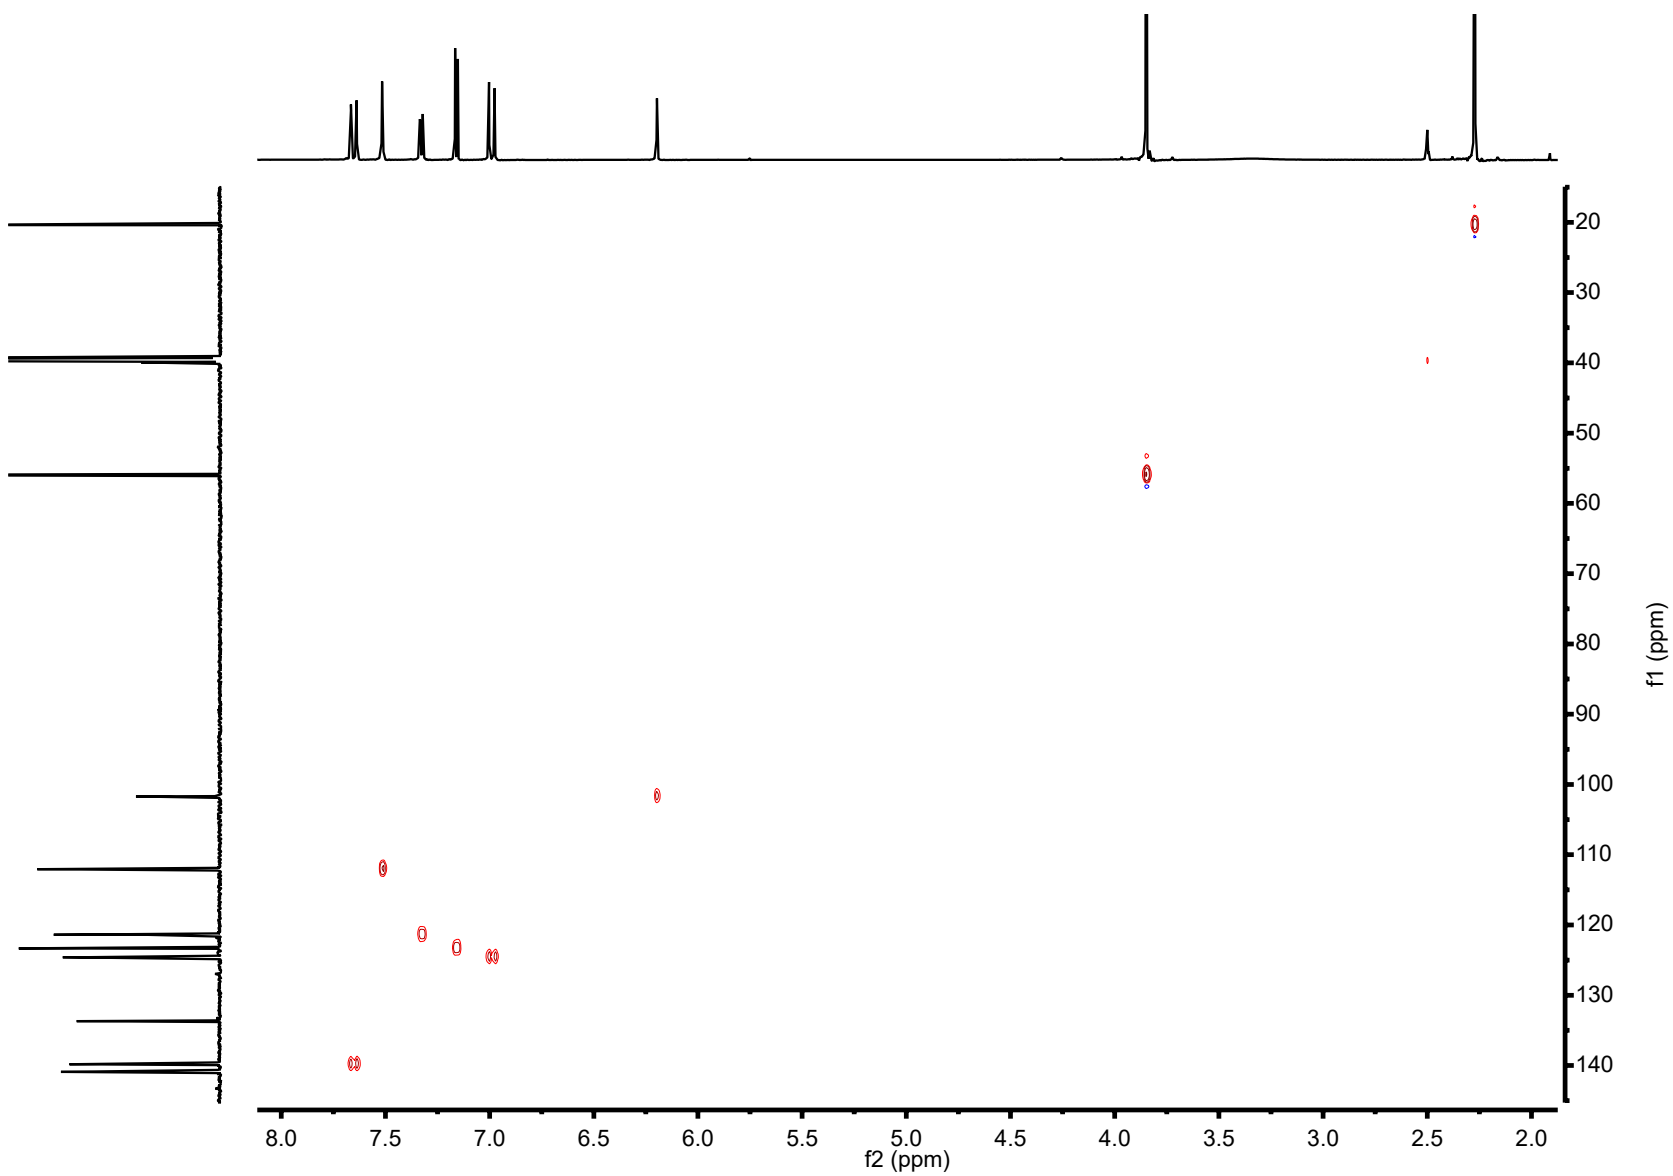

**Fig S4.** 500 MHz HSQC NMR spectrum of DAC.

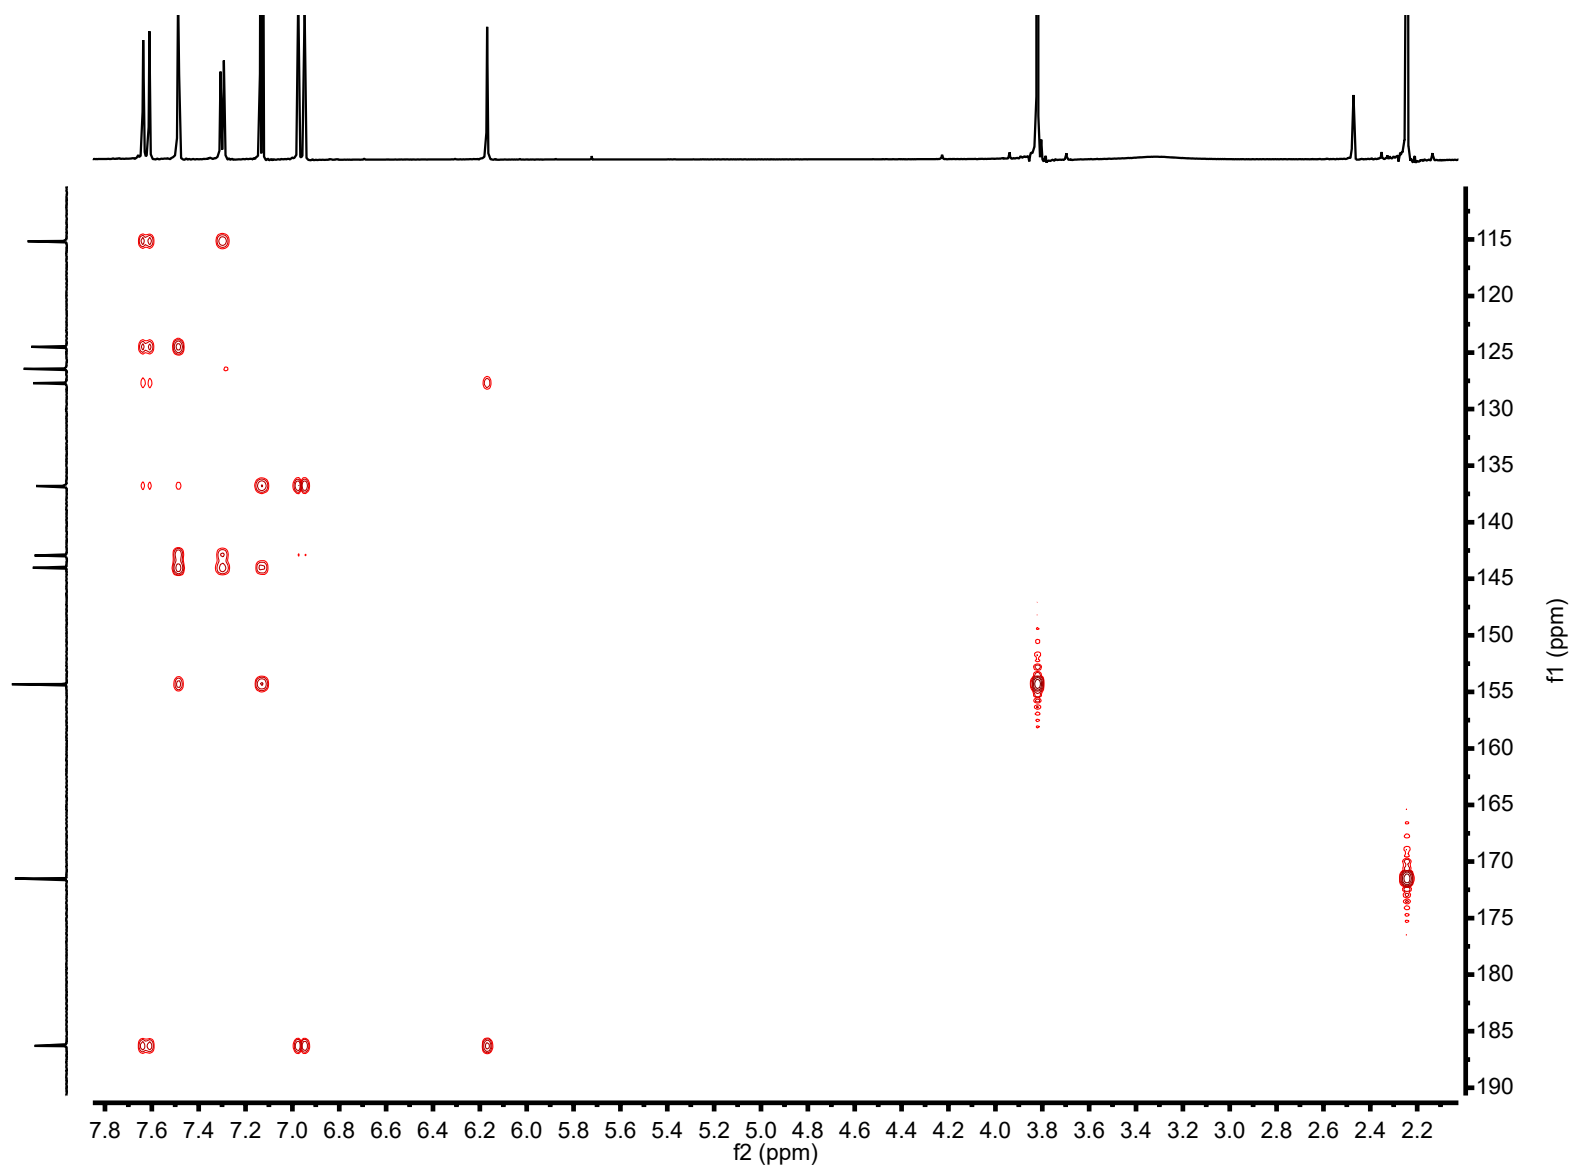

Fig S5. 500 MHz HMBC NMR spectrum of DAC.



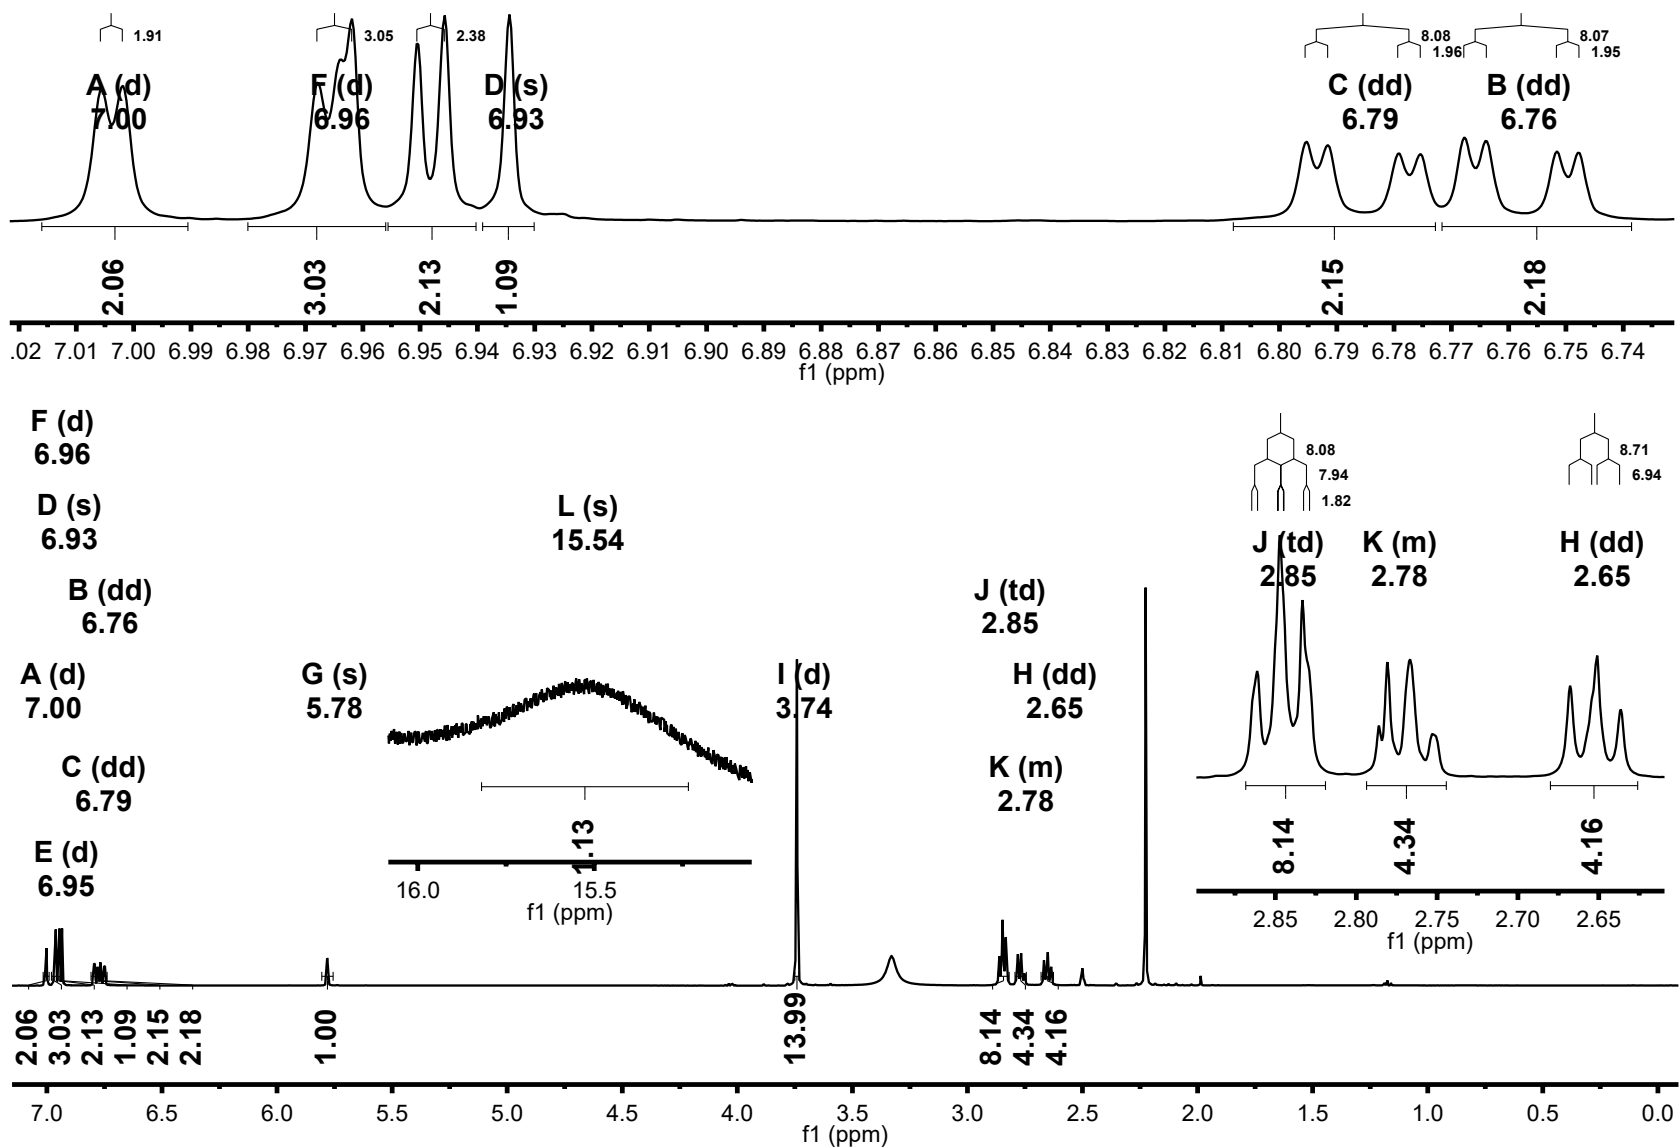

Fig S6. 500 MHz  $^1\text{H}$  NMR spectrum of DACH.

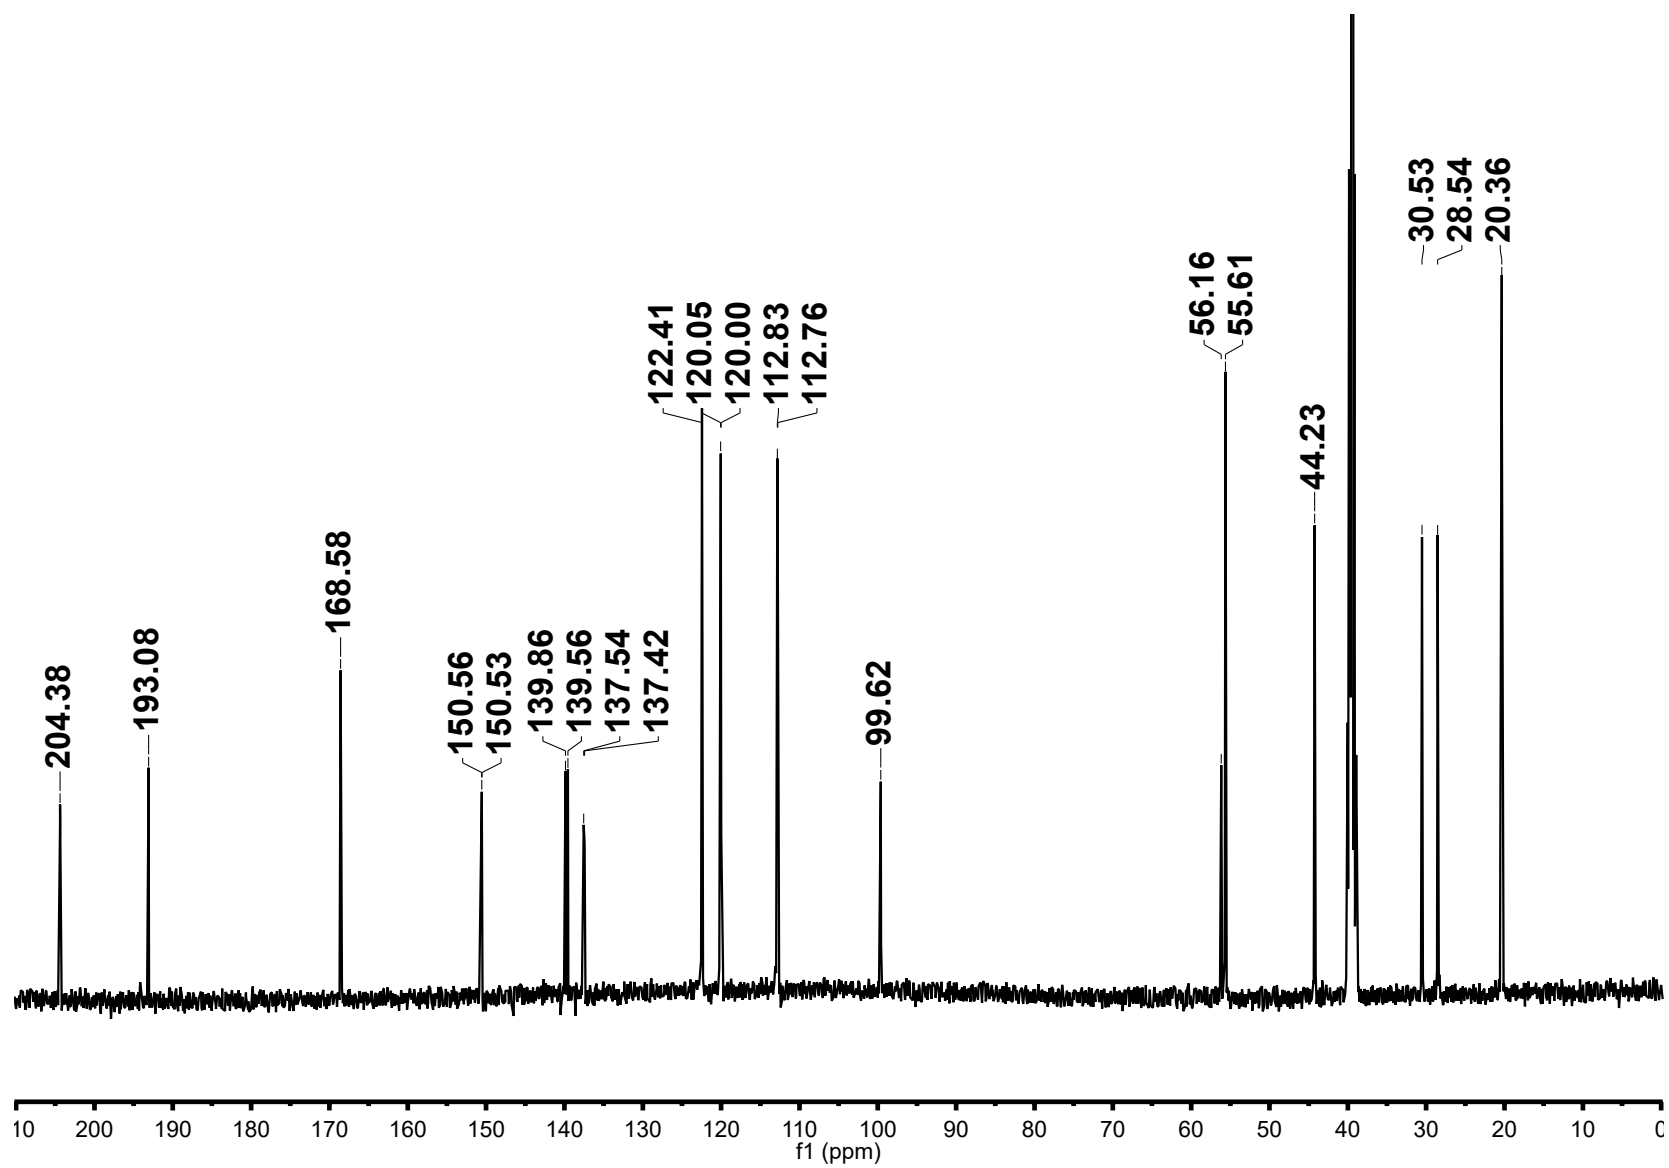

Fig S7. 125 MHz  $^{13}\text{C}$  NMR spectrum of DACH.

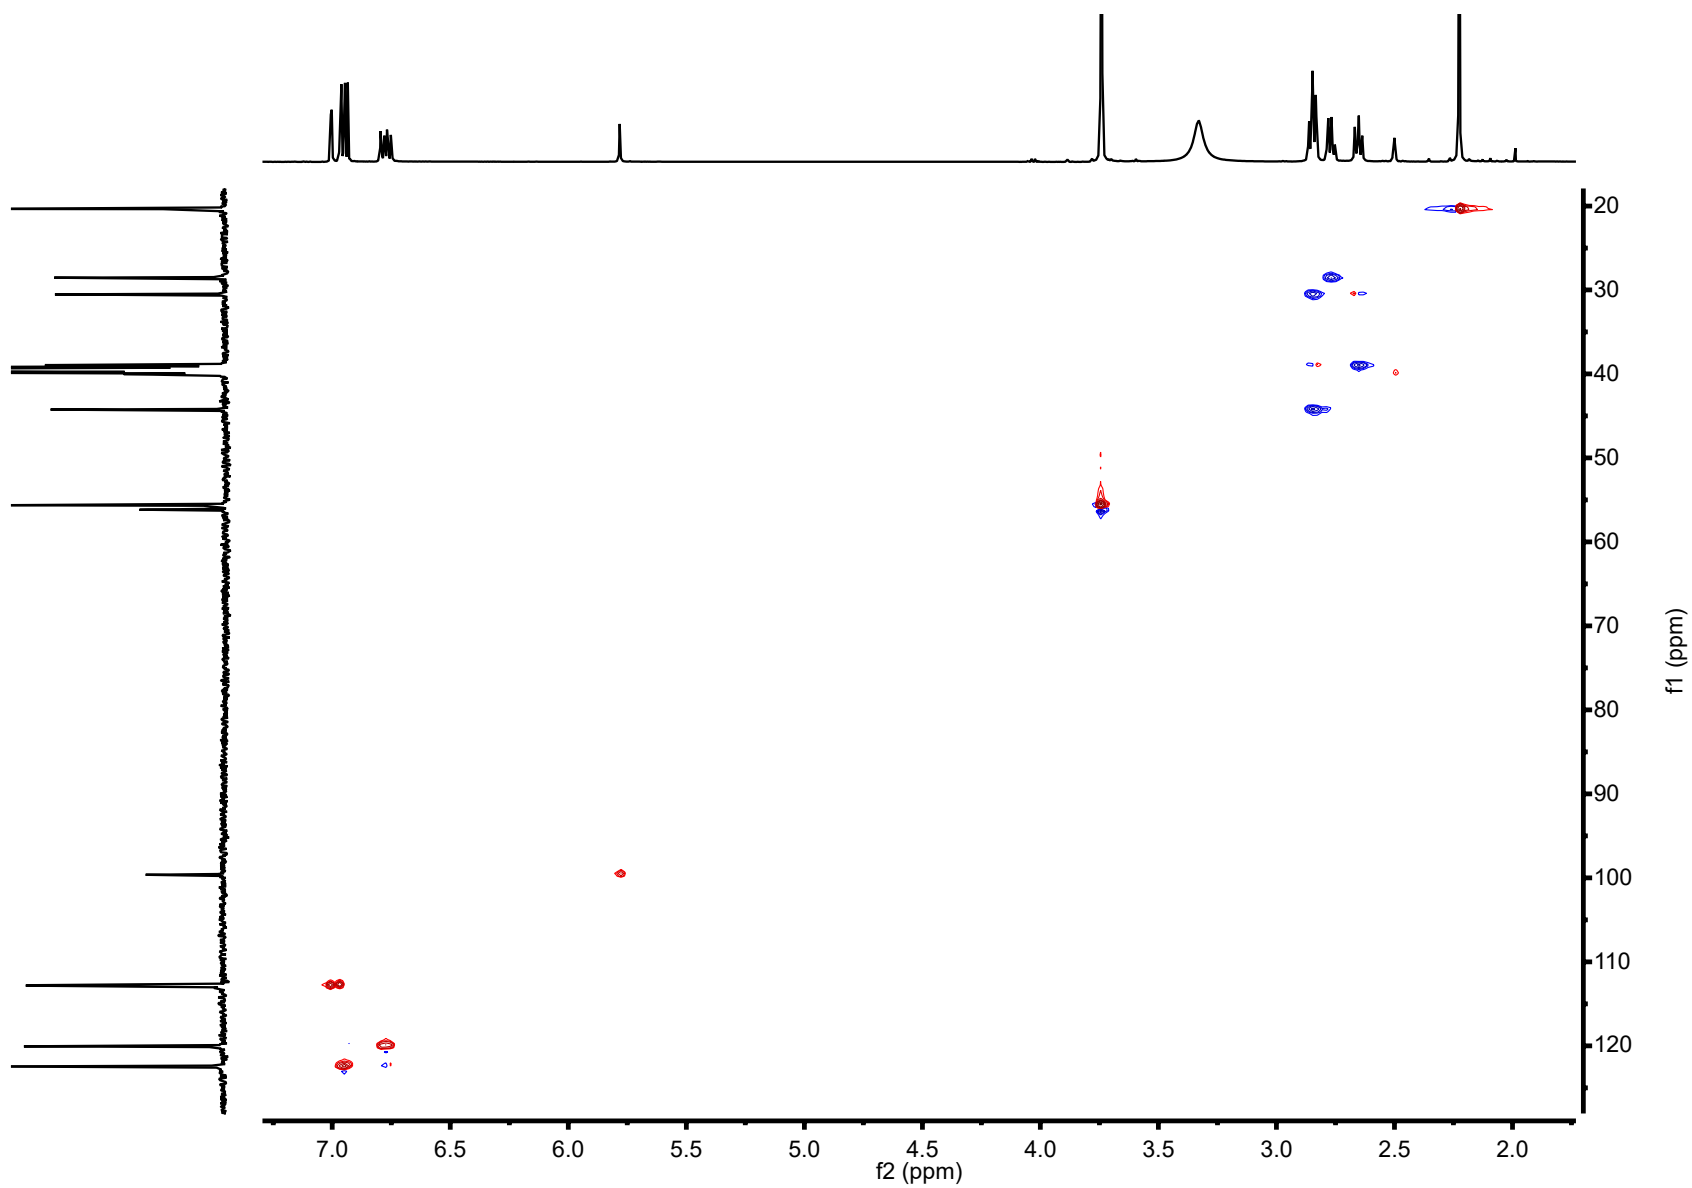

**Fig S8.** 500 MHz HSQC NMR spectrum of DACH.

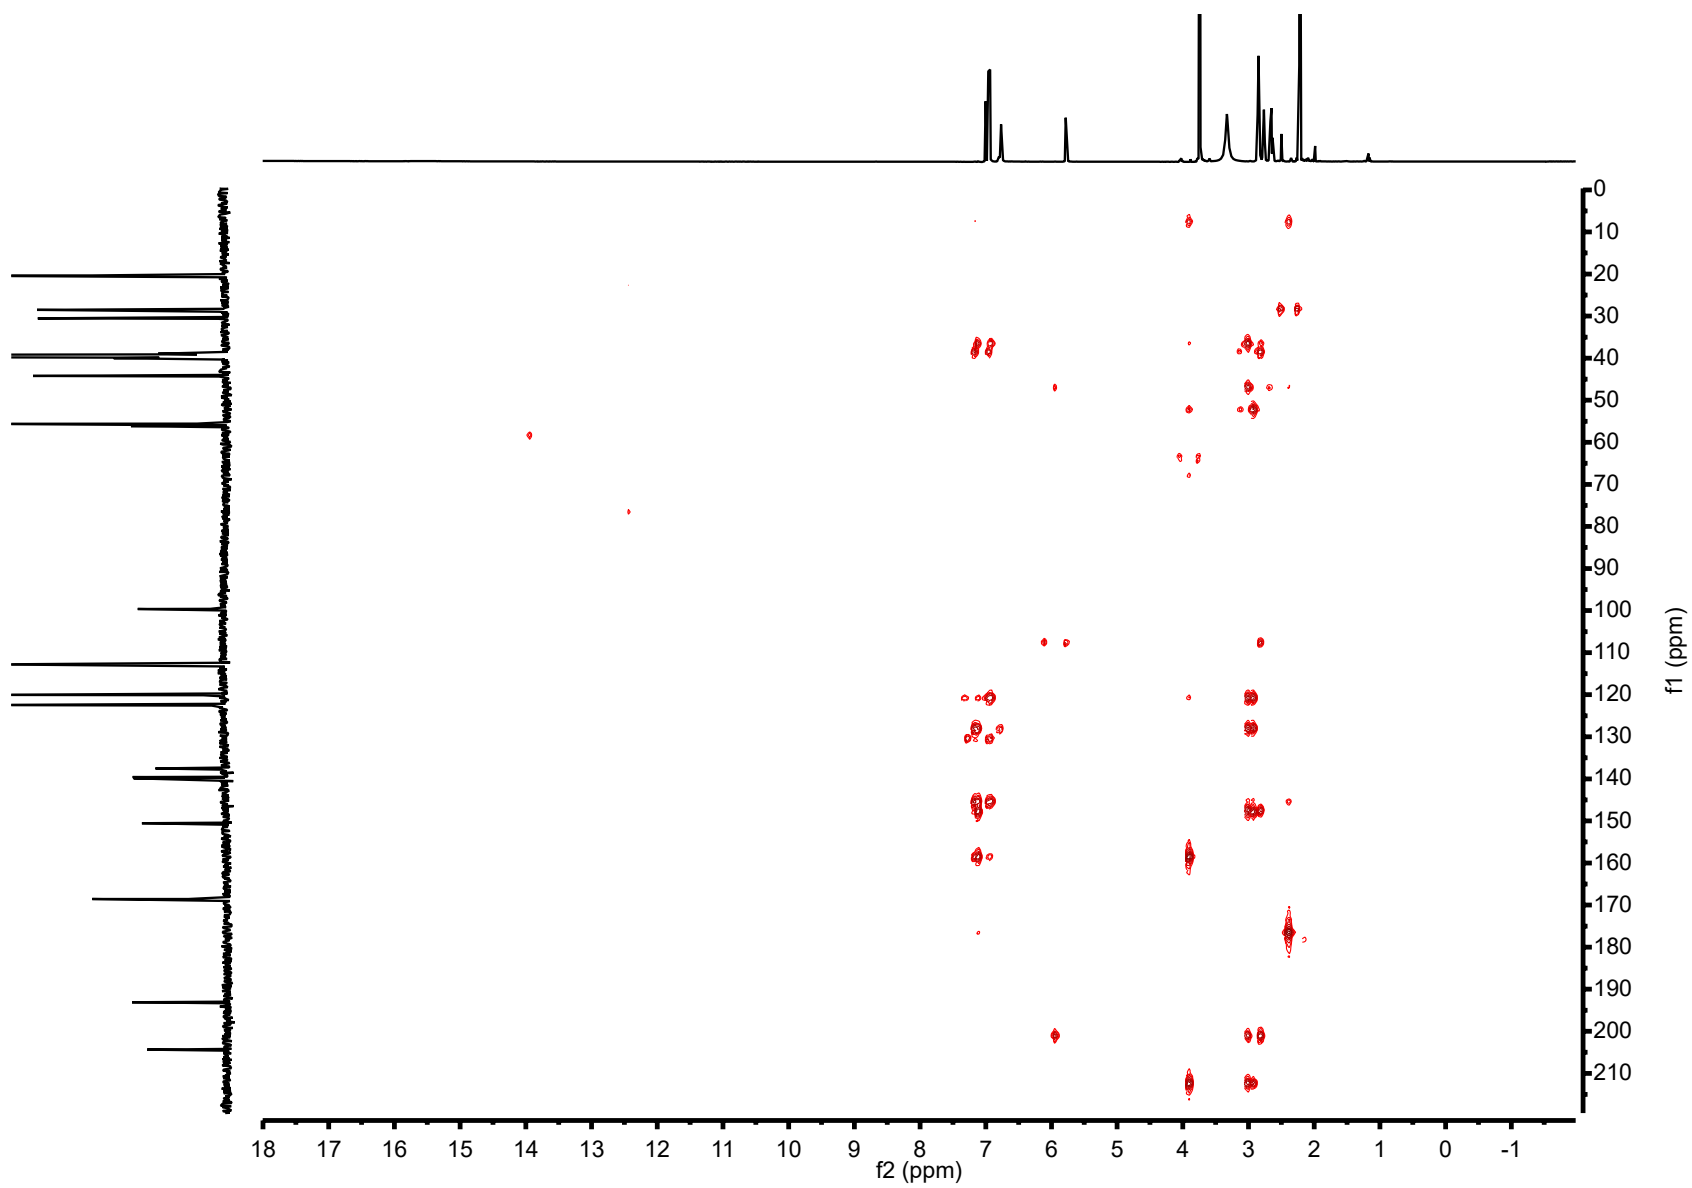

**Fig S9.** 500 MHz HMBC NMR spectrum of DACH.

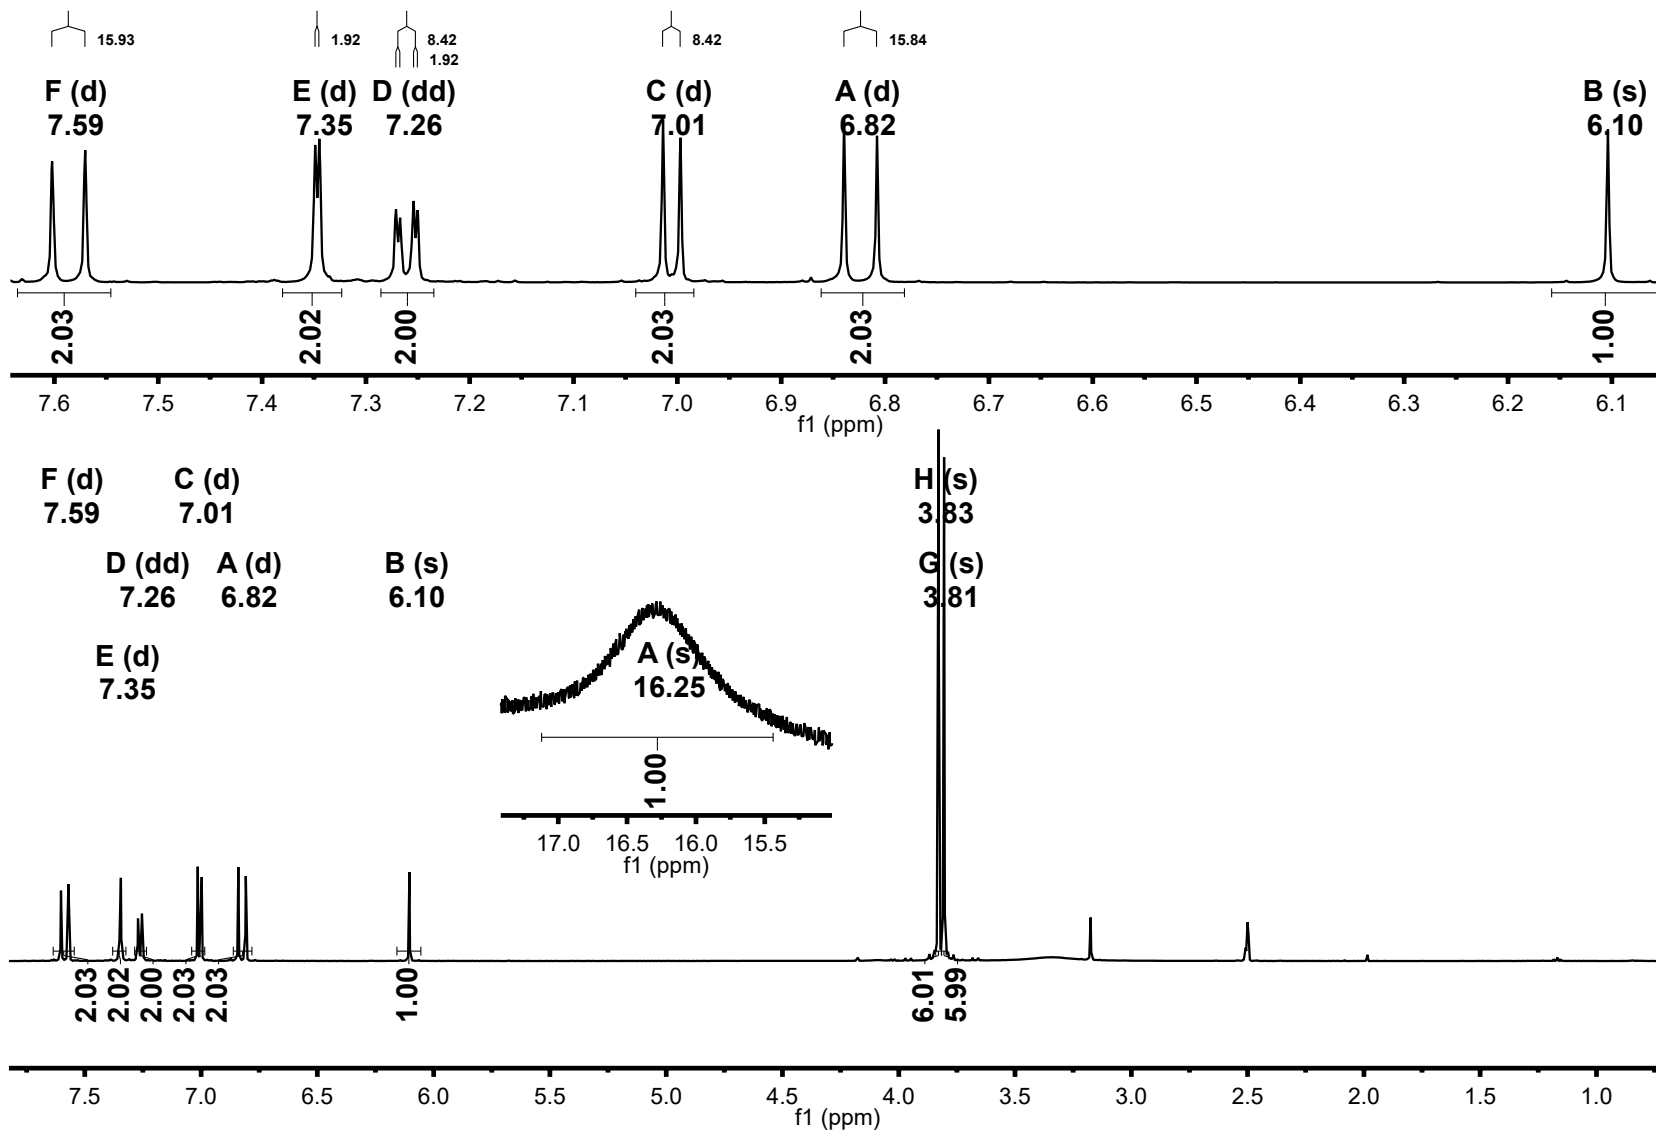

Fig S10. 500 MHz  $^1\text{H}$  NMR spectrum of DiMeOC.

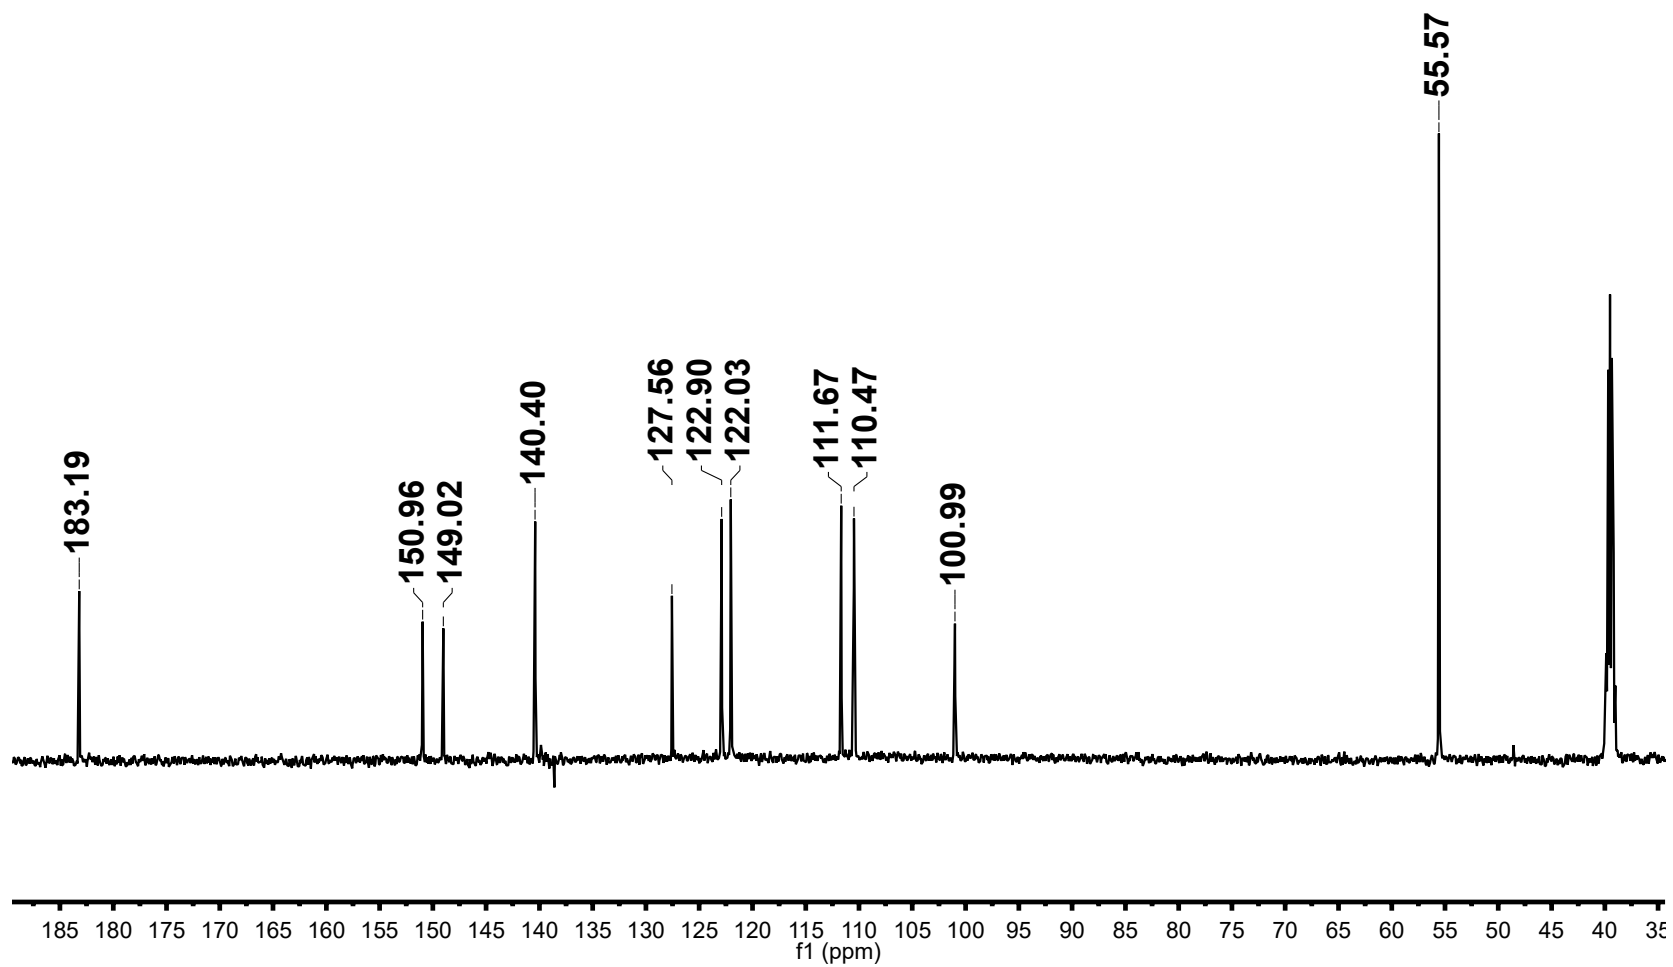

Fig S11. 125 MHz  $^{13}\text{C}$  NMR spectrum of DIMeOC.

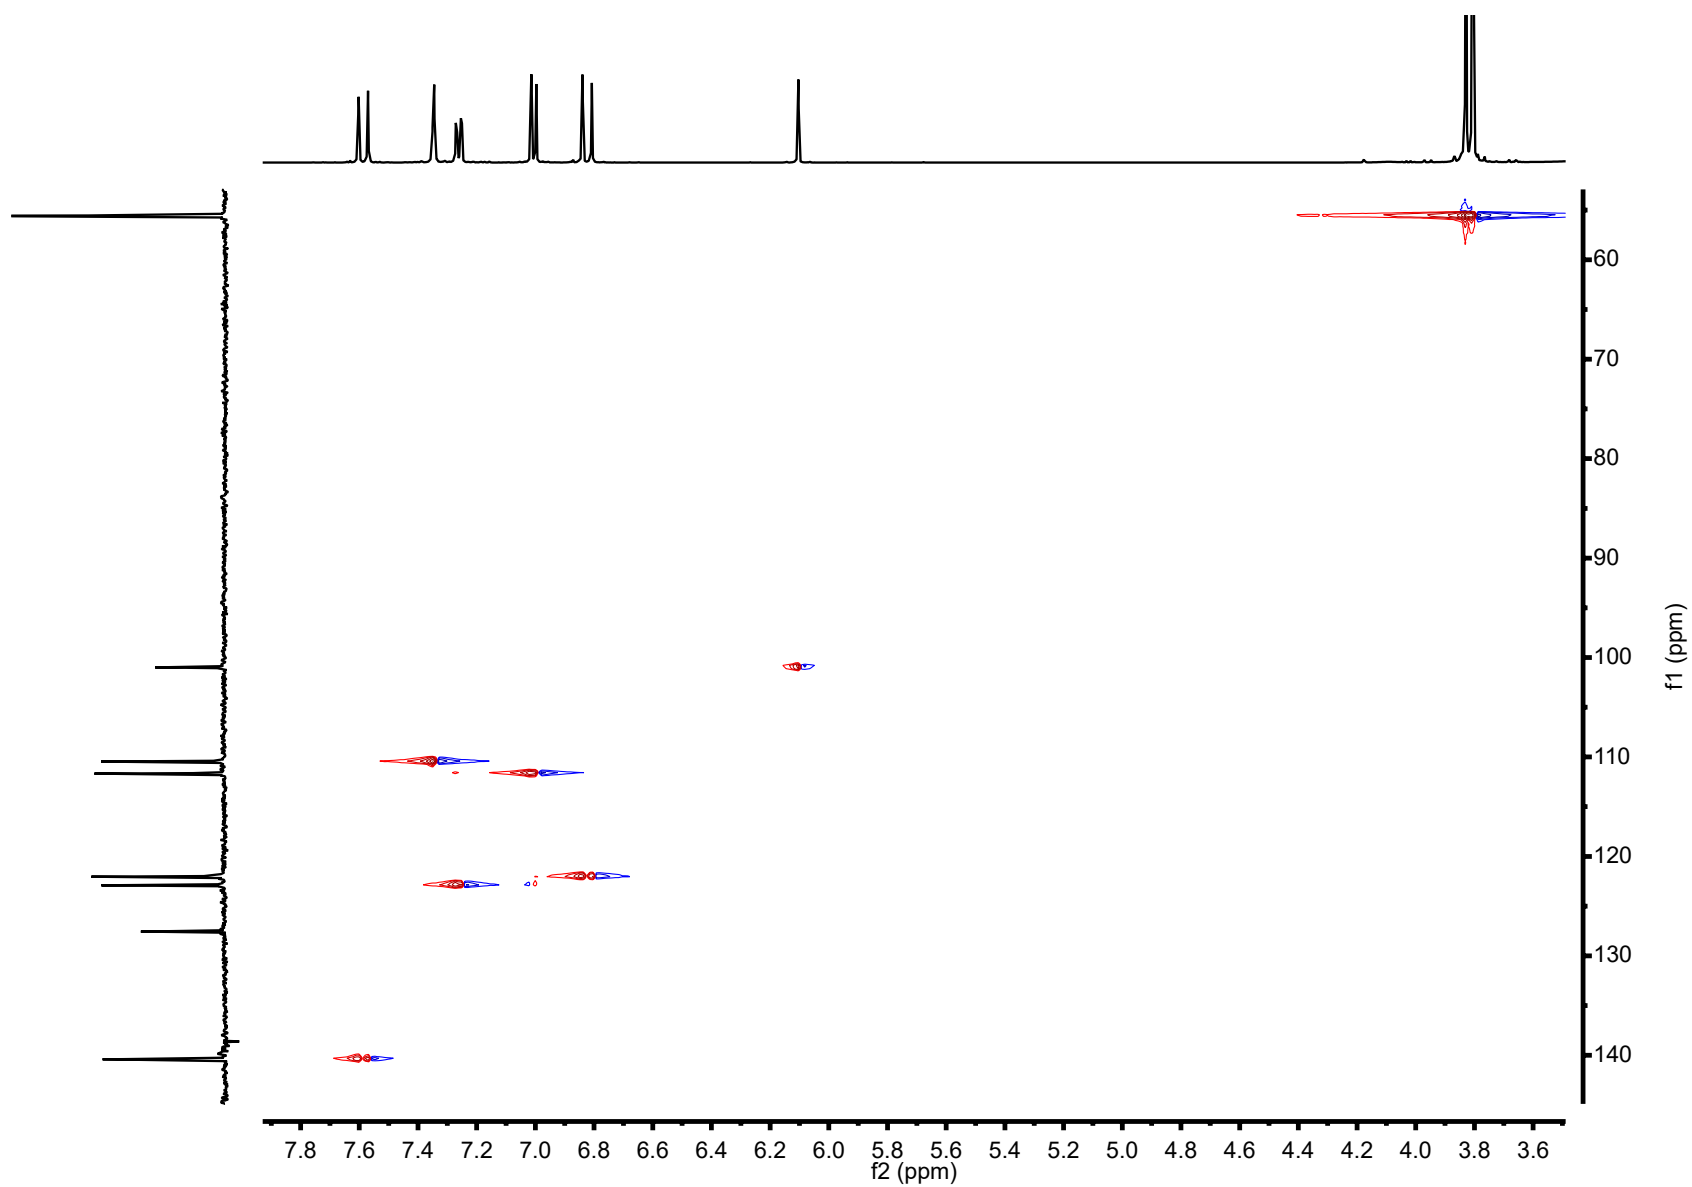

**Fig S12.** 500 MHz HSQC NMR spectrum of DiMeOC.

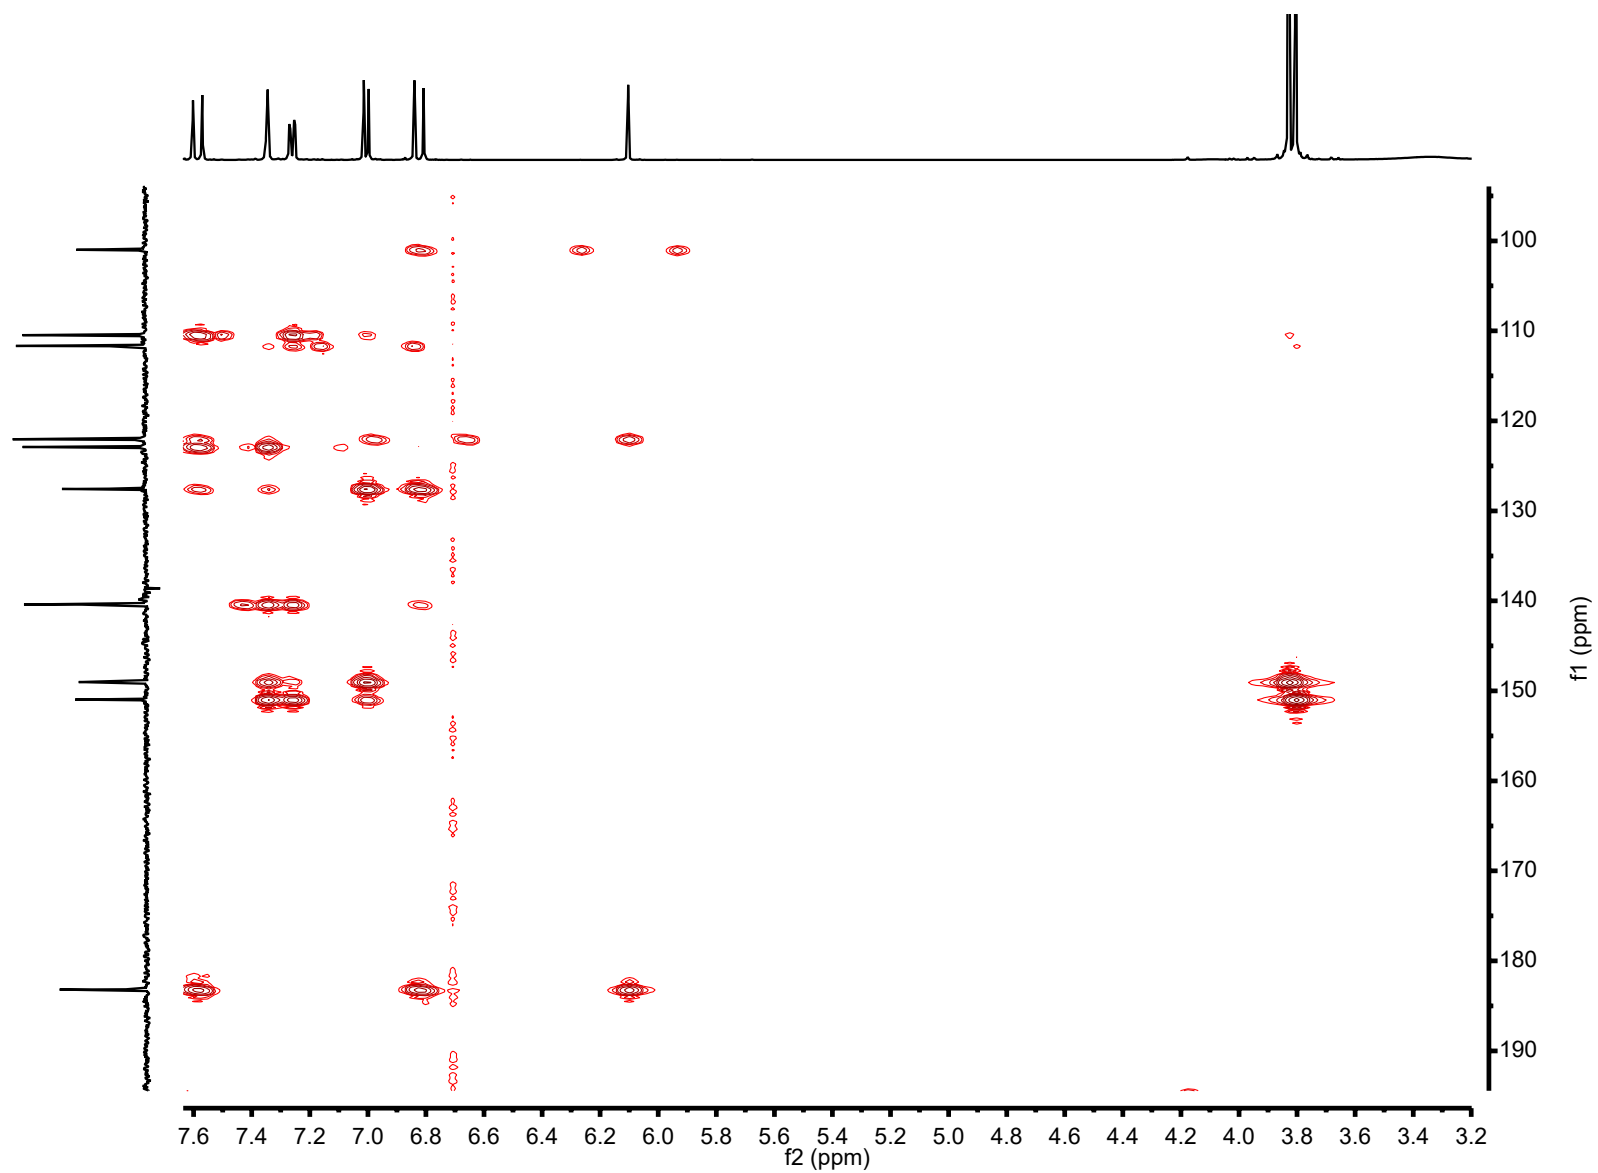

**Fig S13.** 500 MHz HMBC NMR spectrum of DiMeOC.



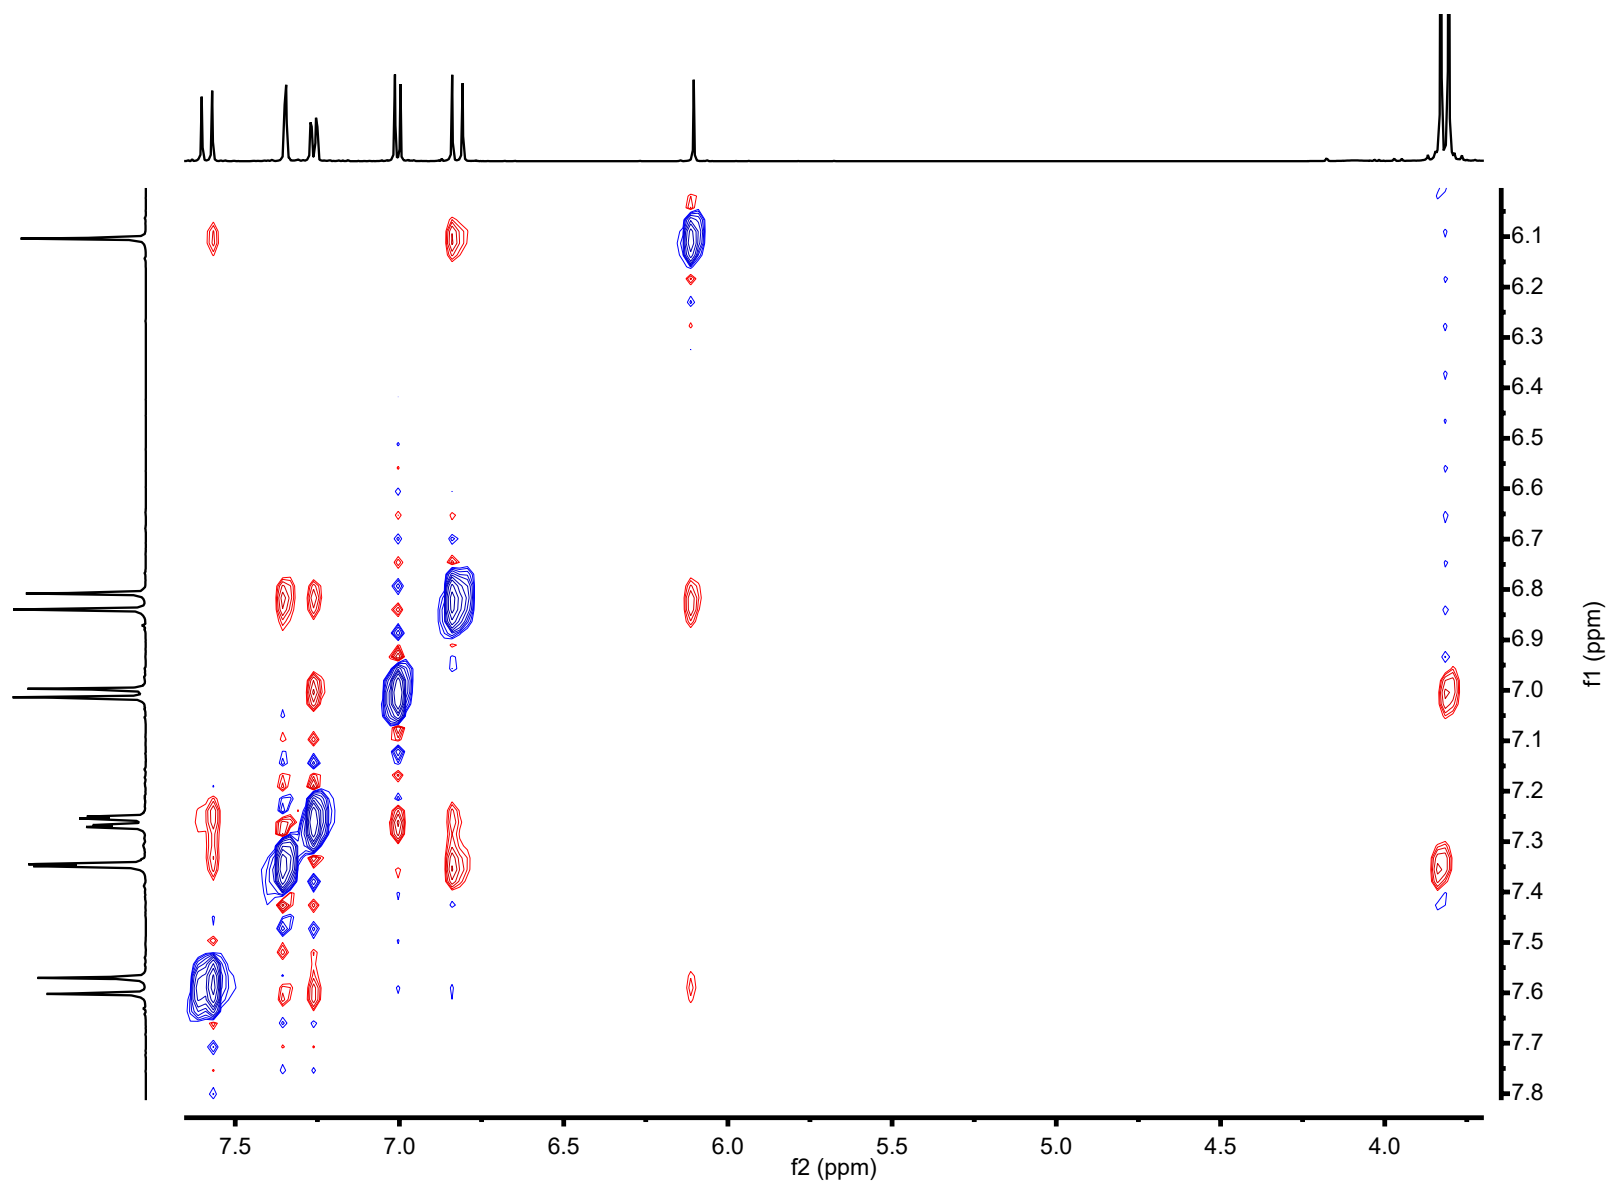

**Fig S14.** 500 MHz ROESY NMR spectrum of DiMeOC.

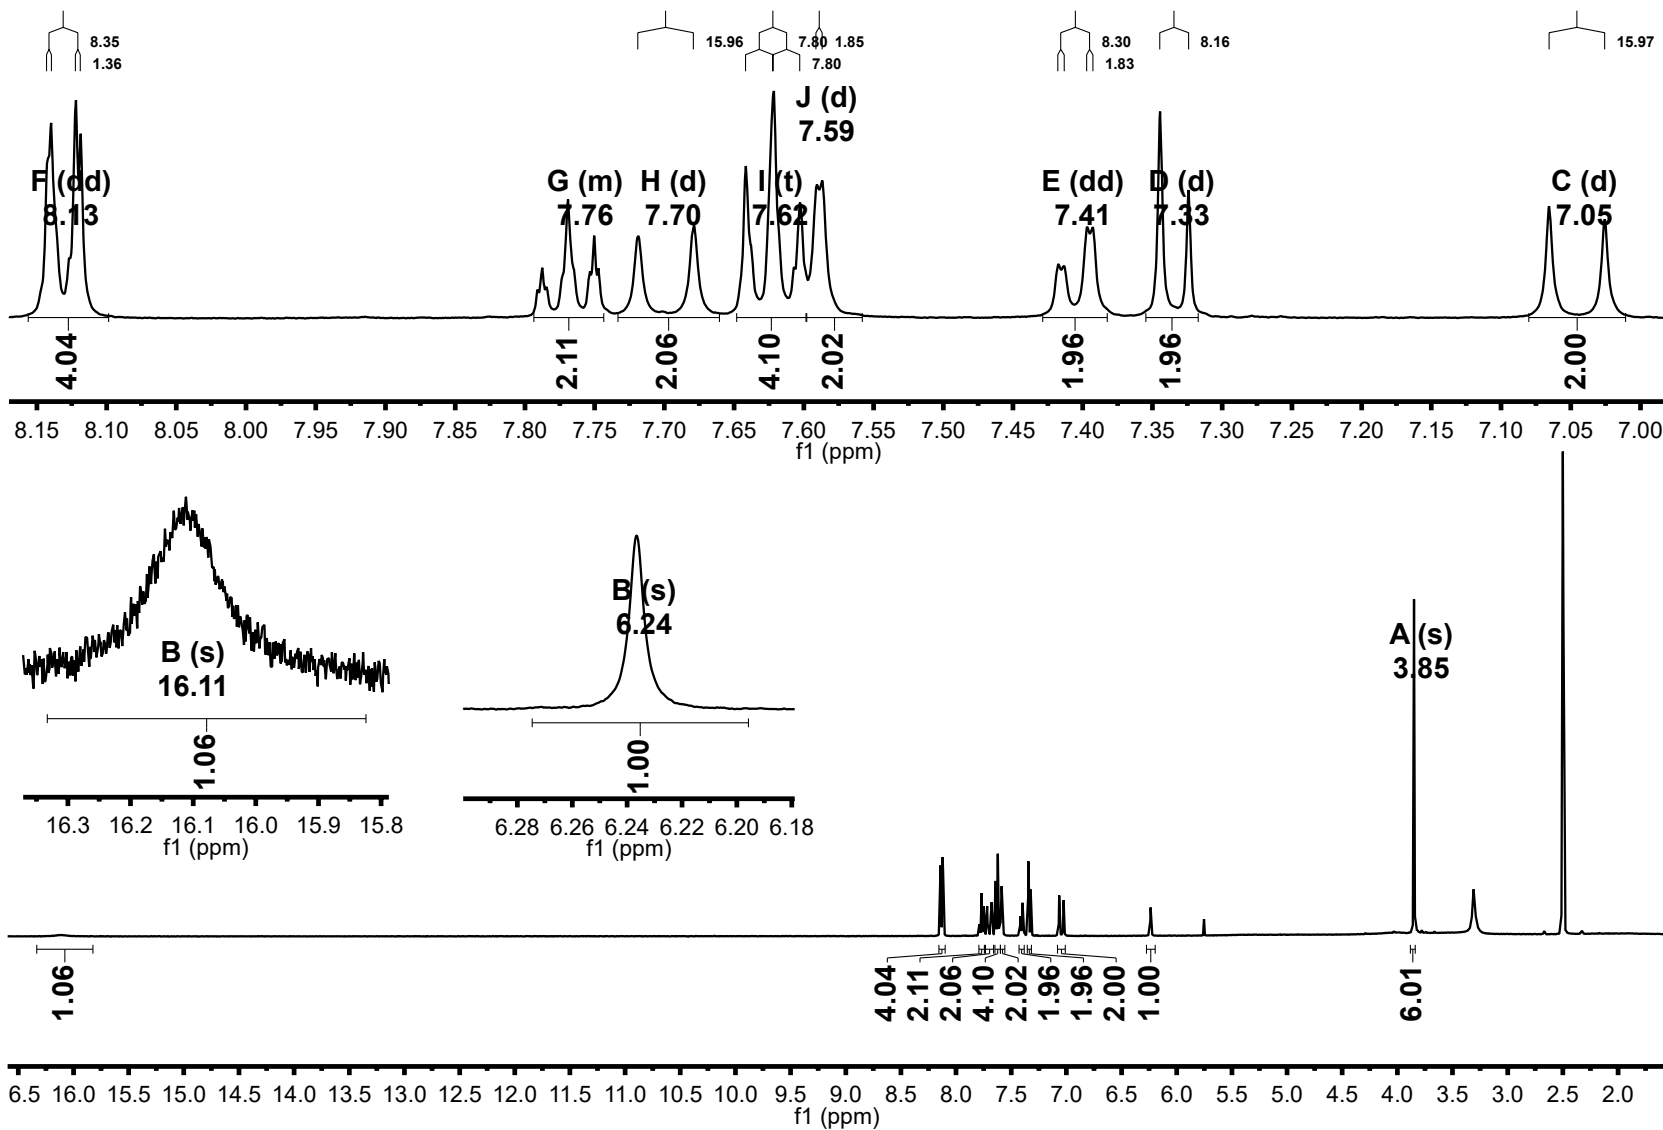

Fig S15. 500 MHz  $^1\text{H}$  NMR spectrum of DiBzOC.

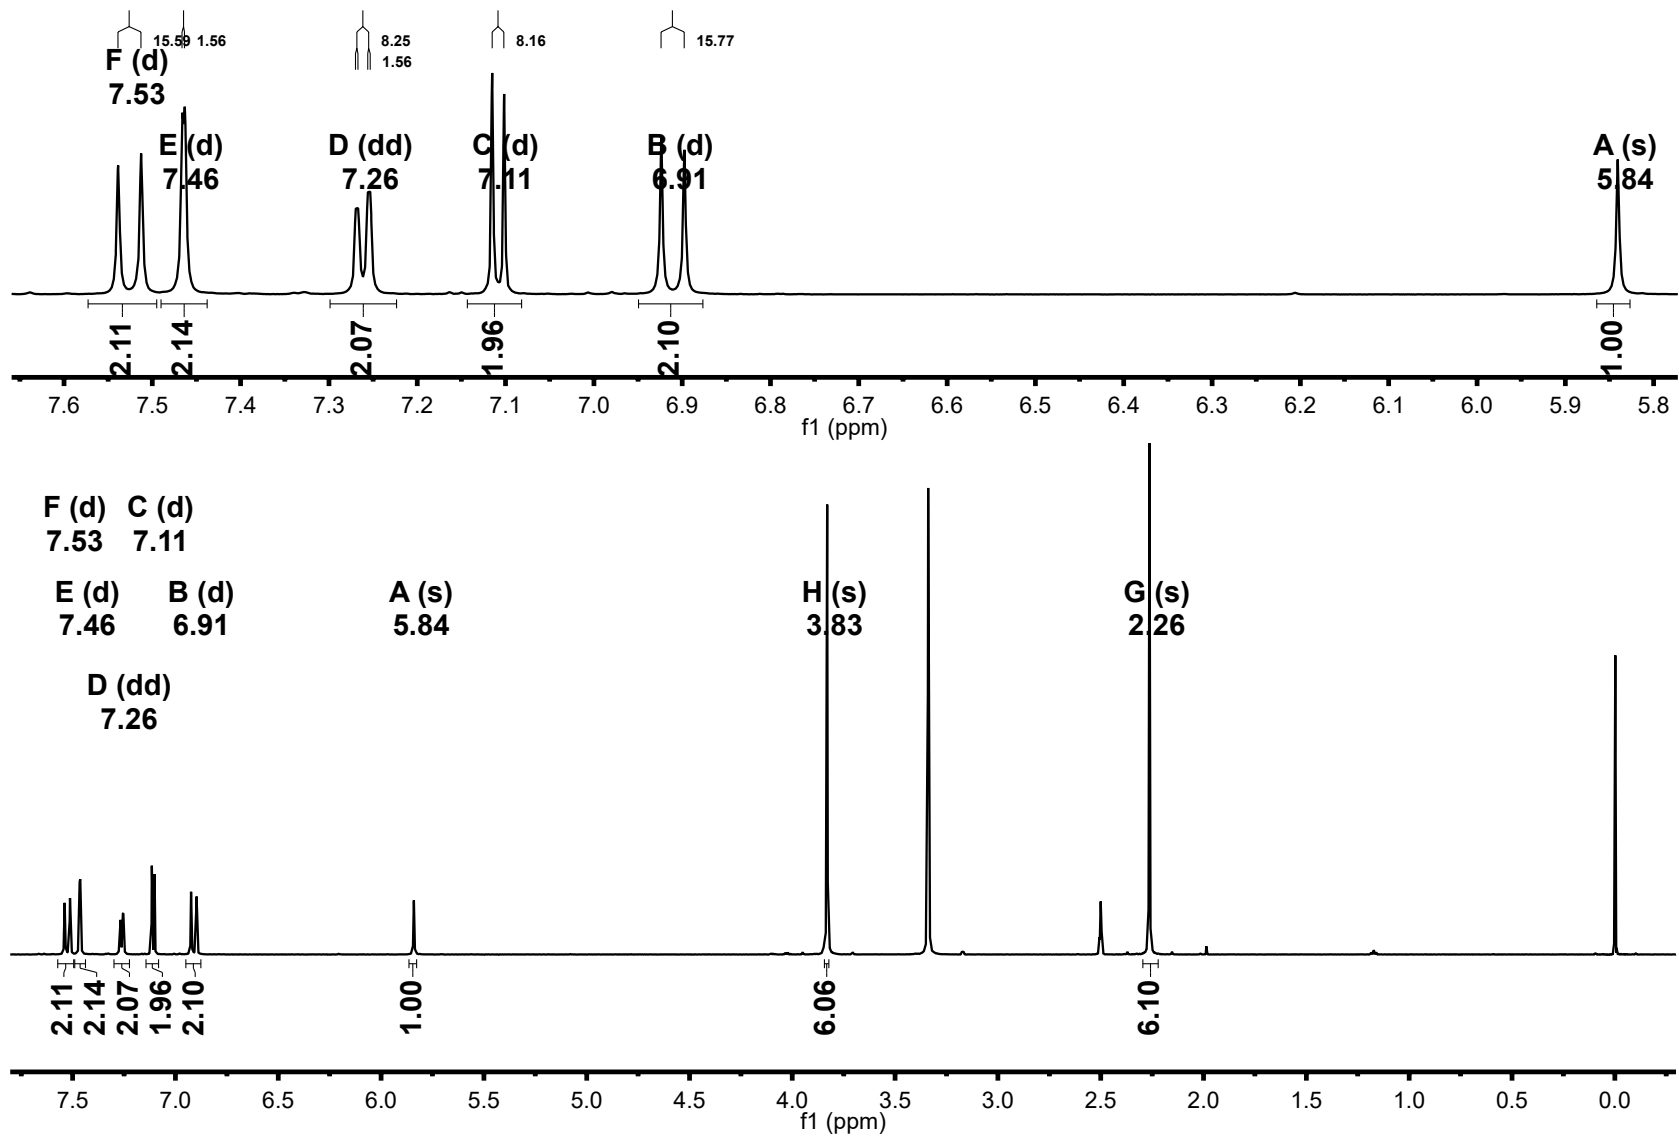

Fig S16. 500 MHz <sup>1</sup>H NMR spectrum of DAC-Zn.

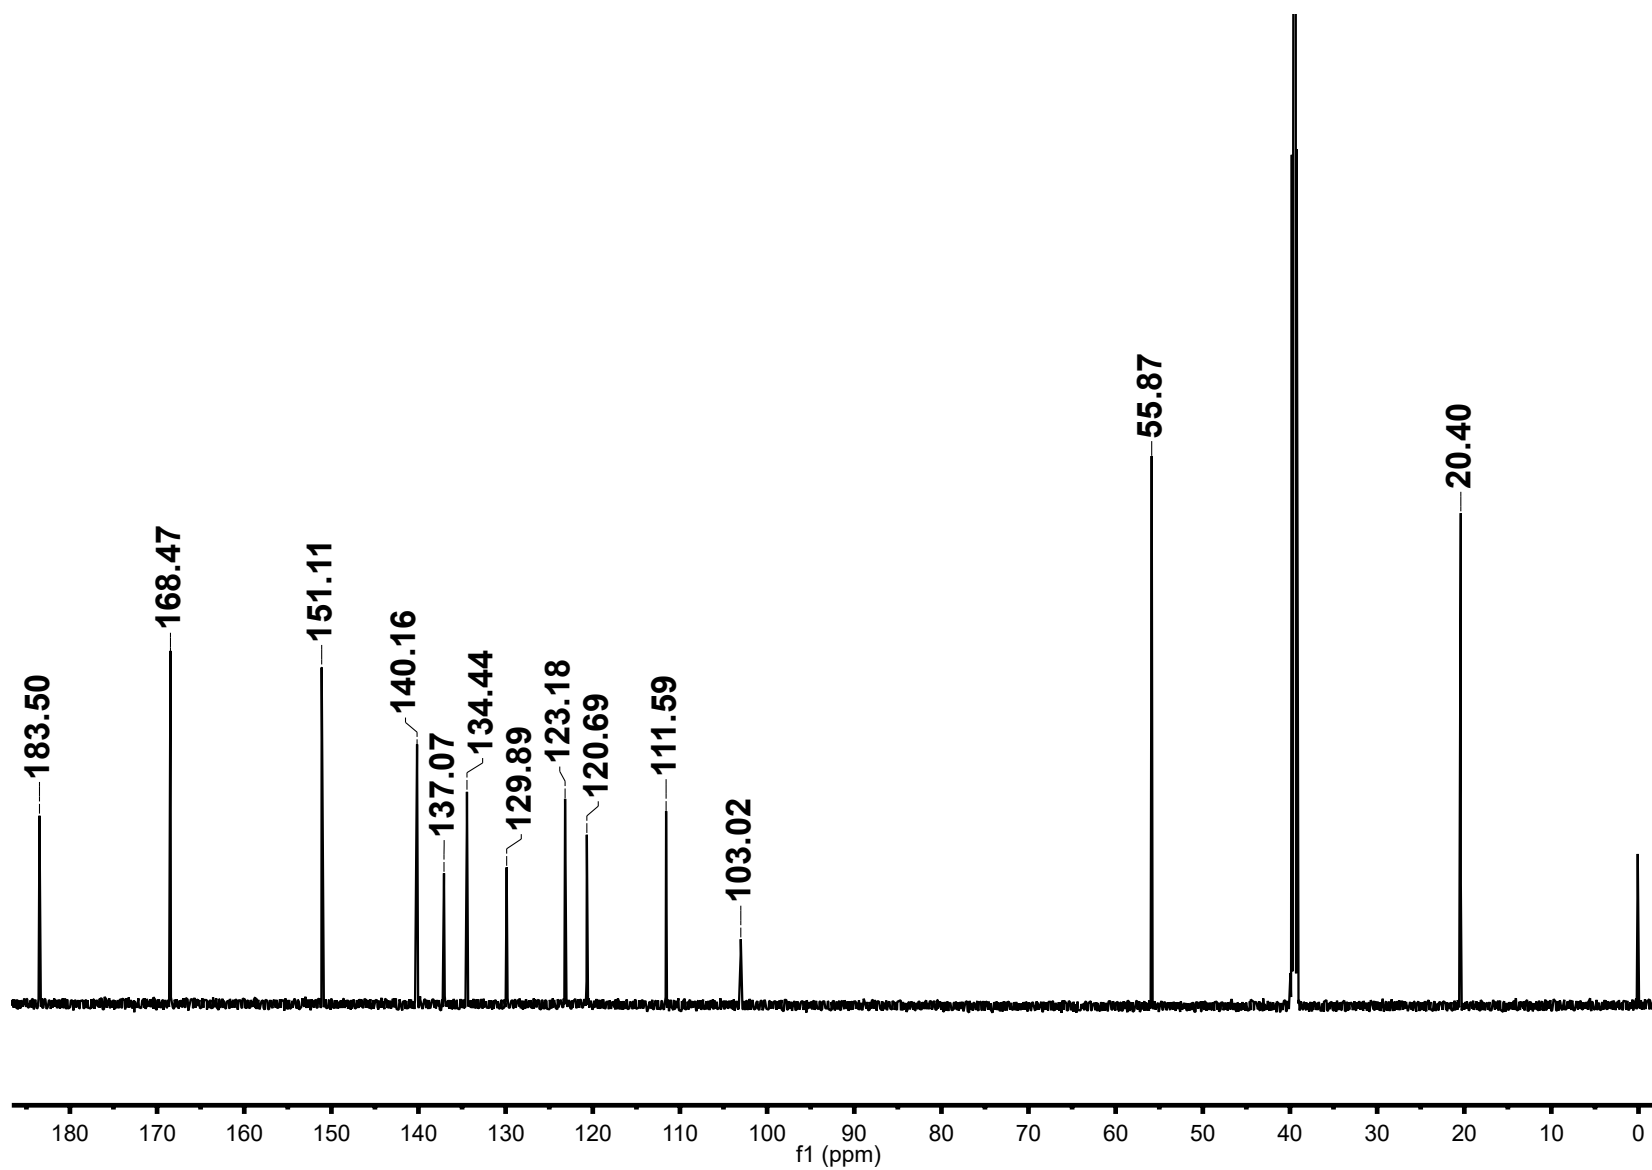

Fig S17. 125 MHz <sup>13</sup>C NMR spectrum of DAC-Zn.

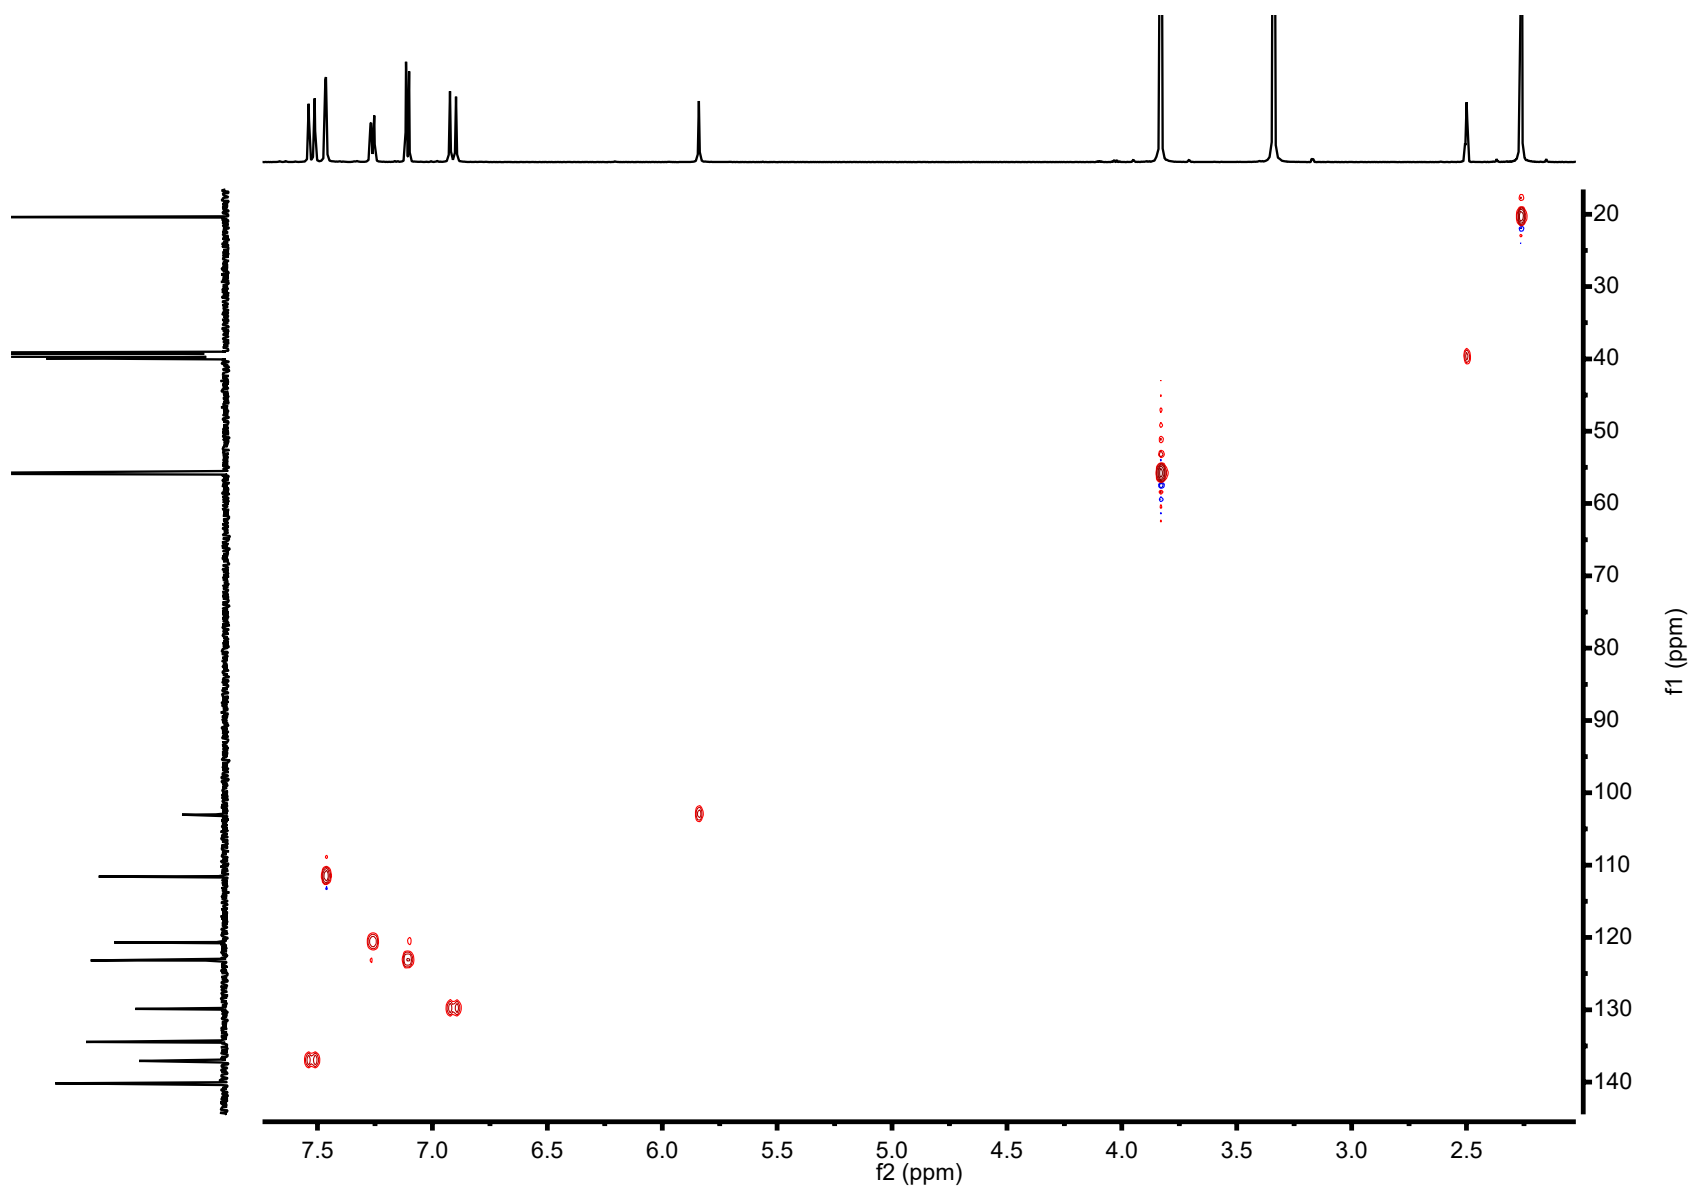

**Fig S18.** 500 MHz HSQC NMR spectrum of DAC-Zn.

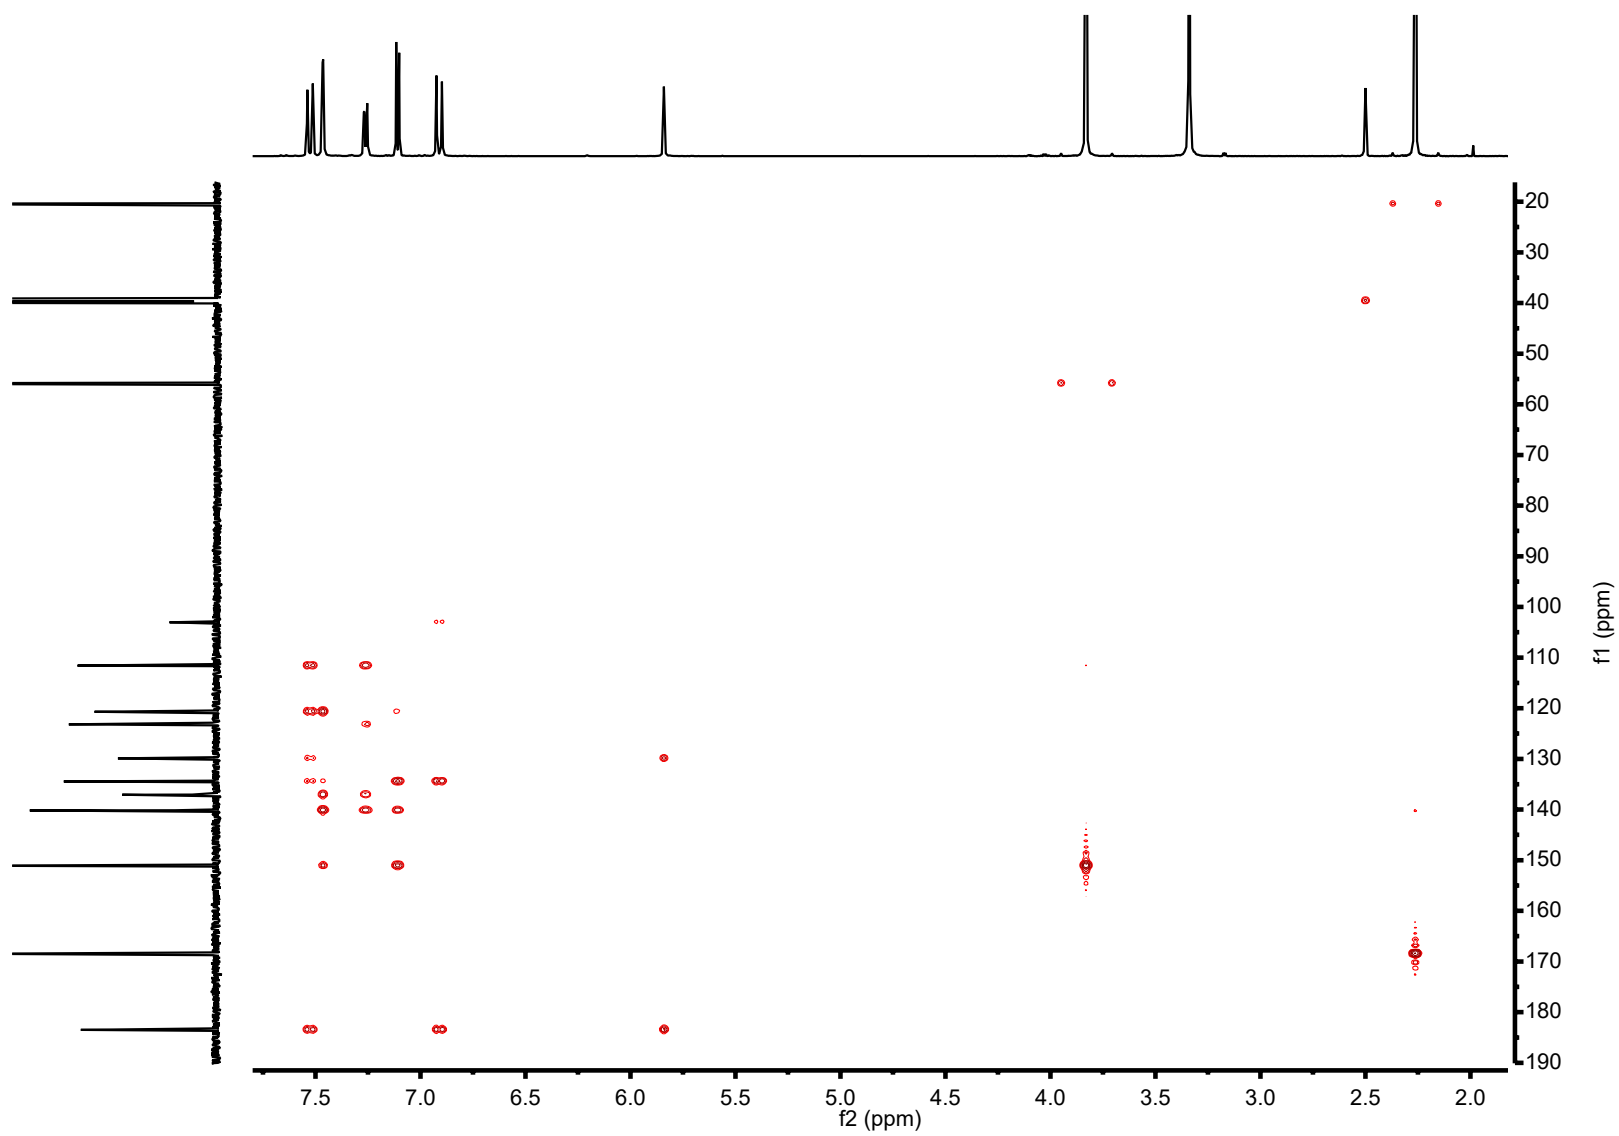

**Fig S19.** 500 MHz HMBC NMR spectrum of DAC-Zn.

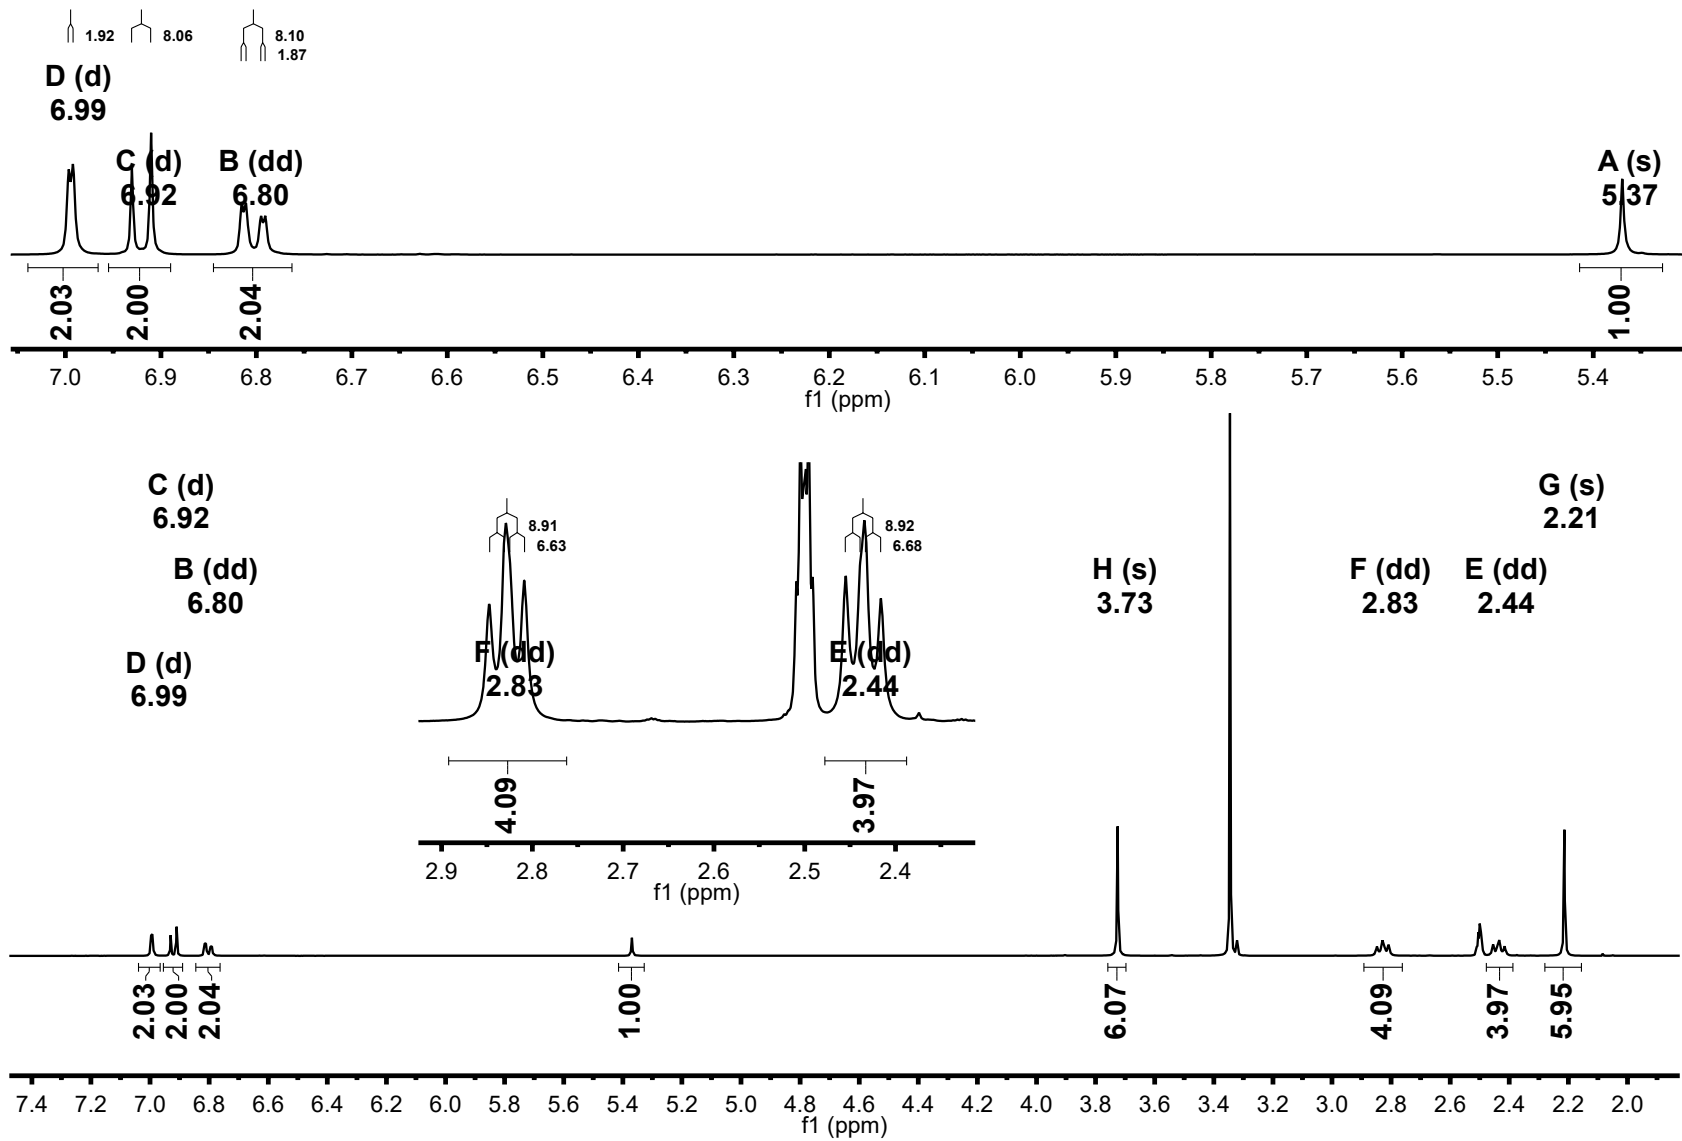

Fig S20. 500 MHz  $^1\text{H}$  NMR spectrum of DACH-Zn.

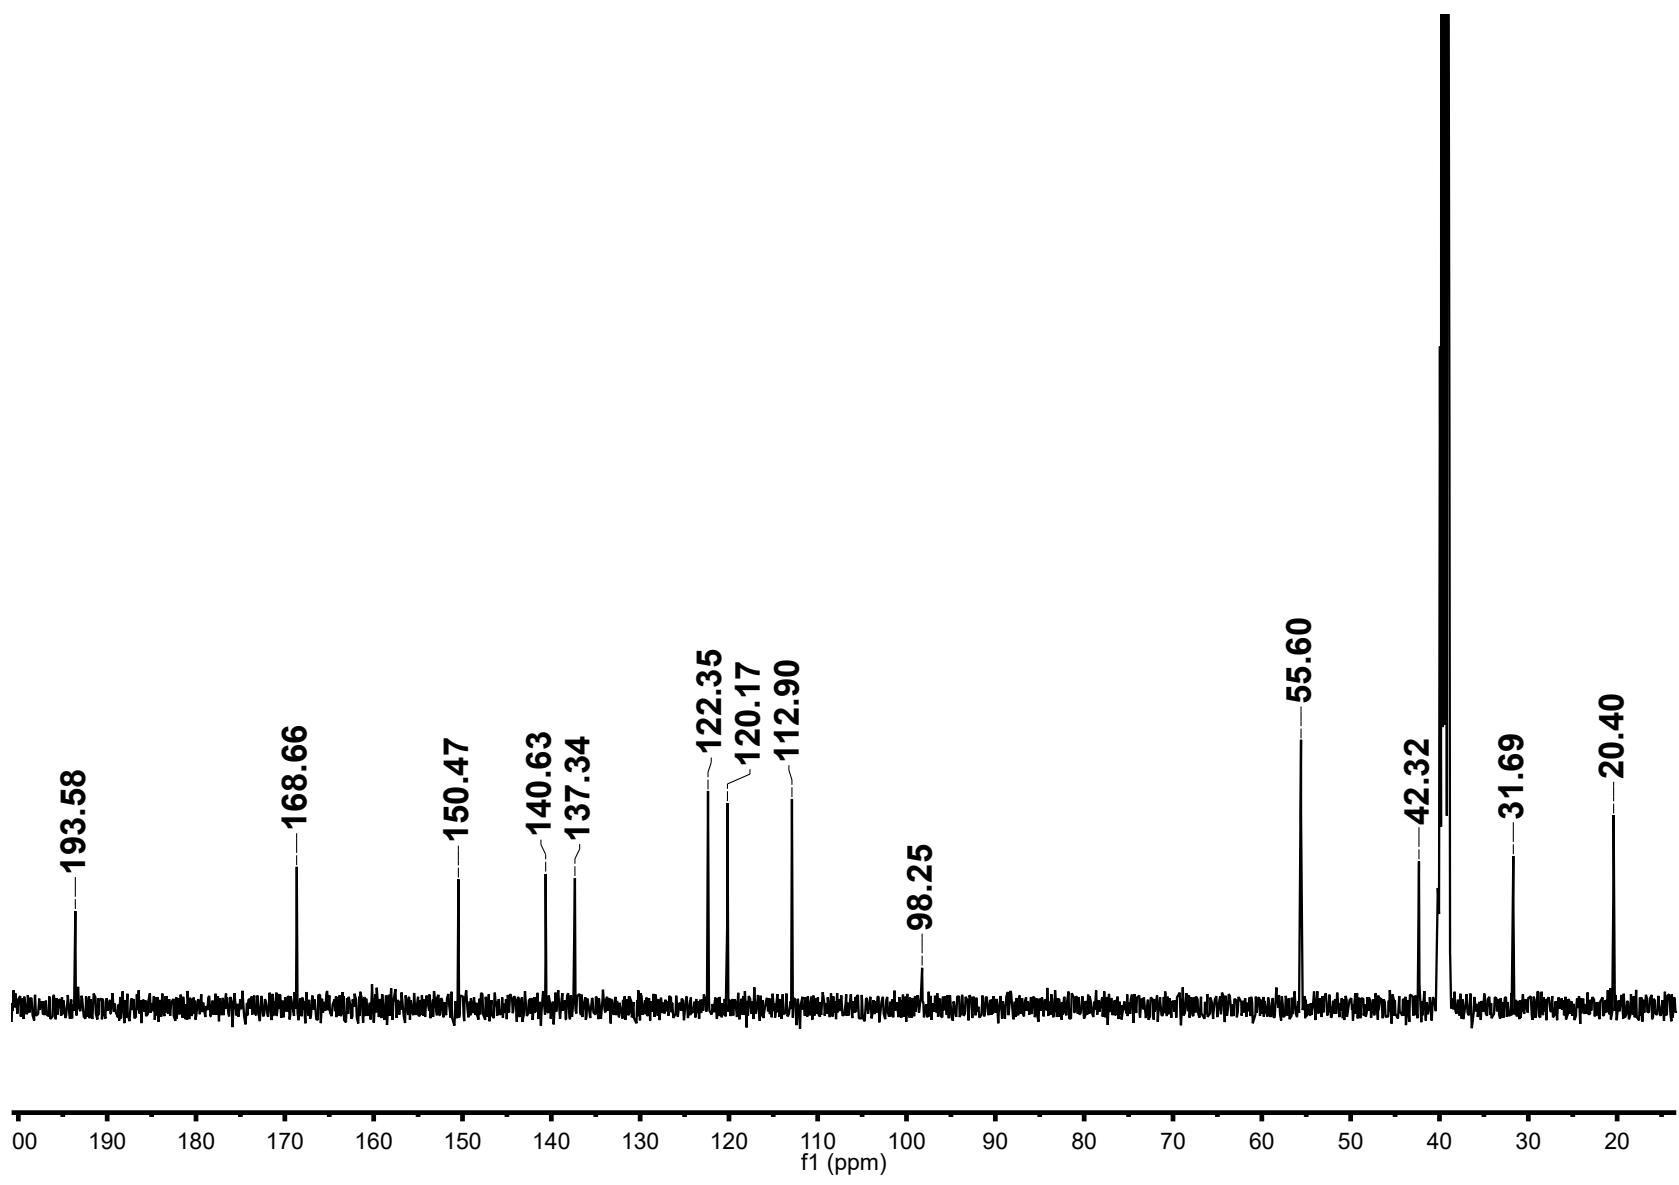

Fig S21. 125 MHz  $^{13}\text{C}$  NMR spectrum of DACH-Zn.



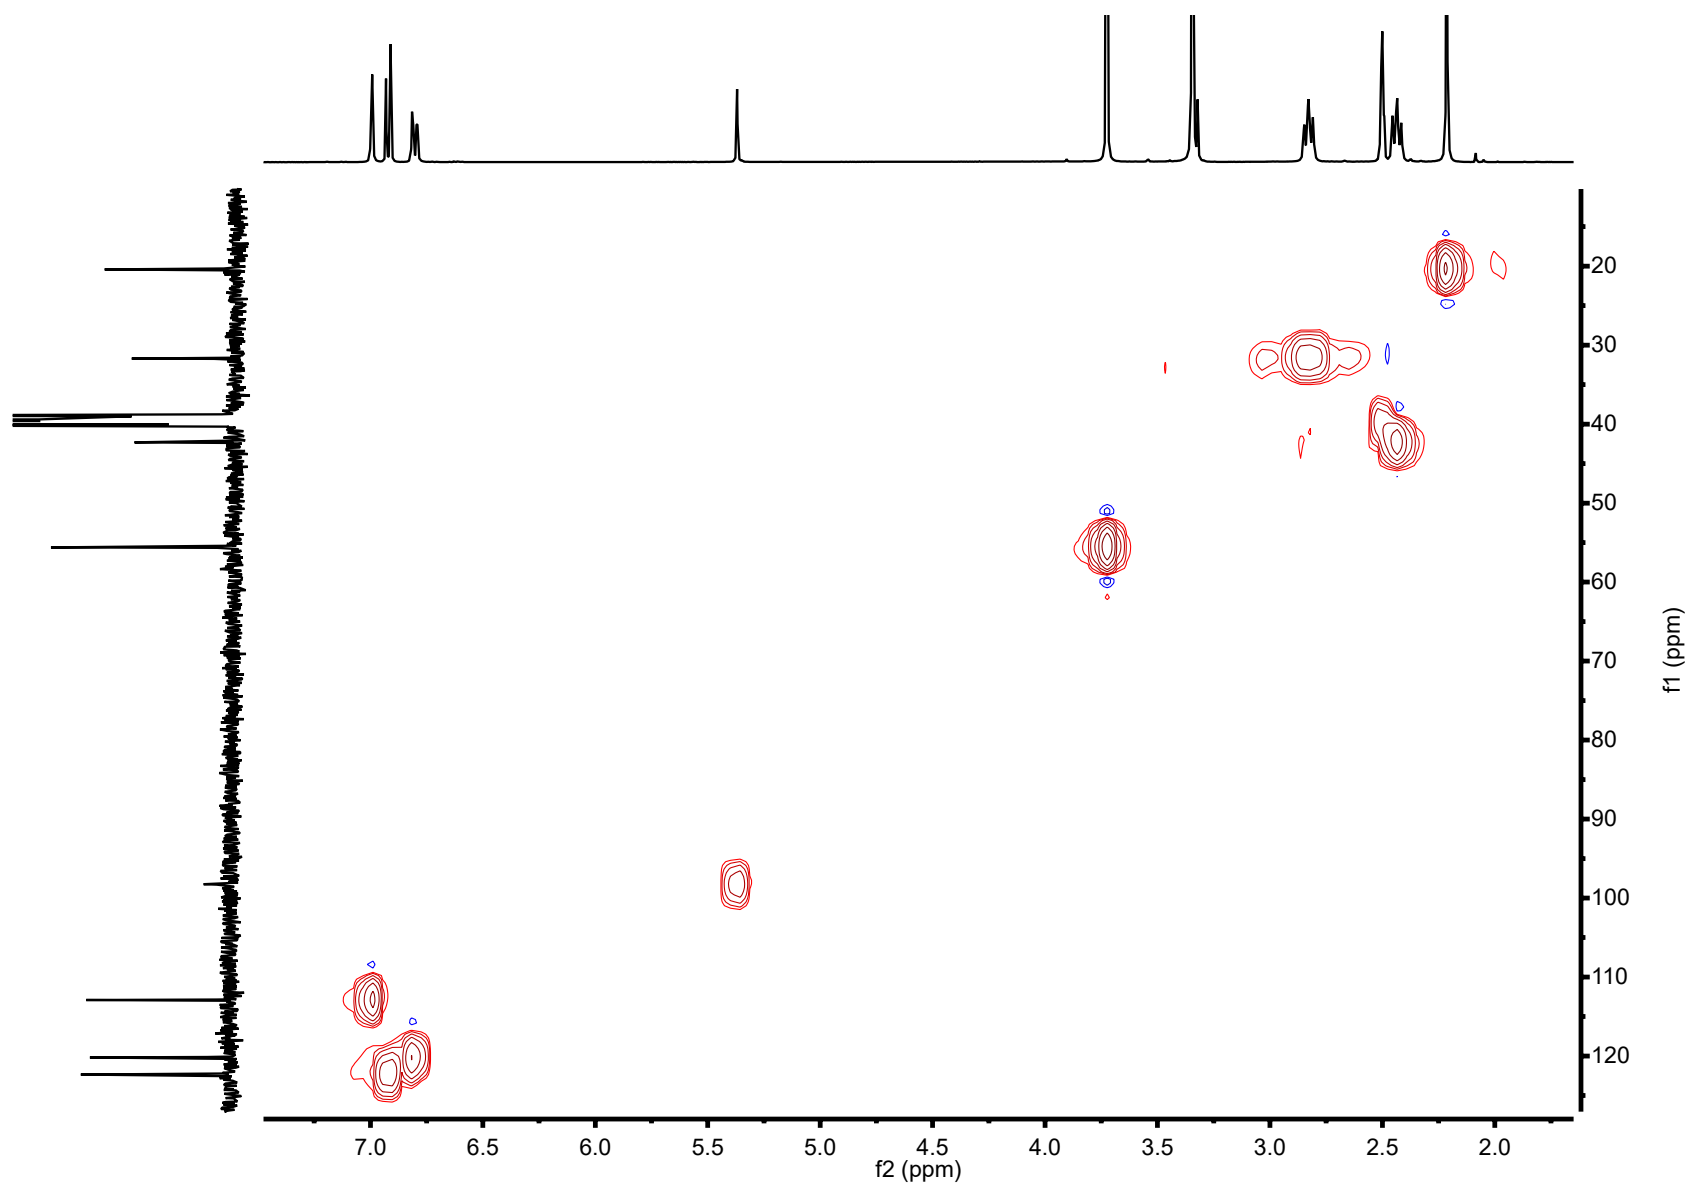

**Fig S22.** 500 MHz HSQC NMR spectrum of DACH-Zn.

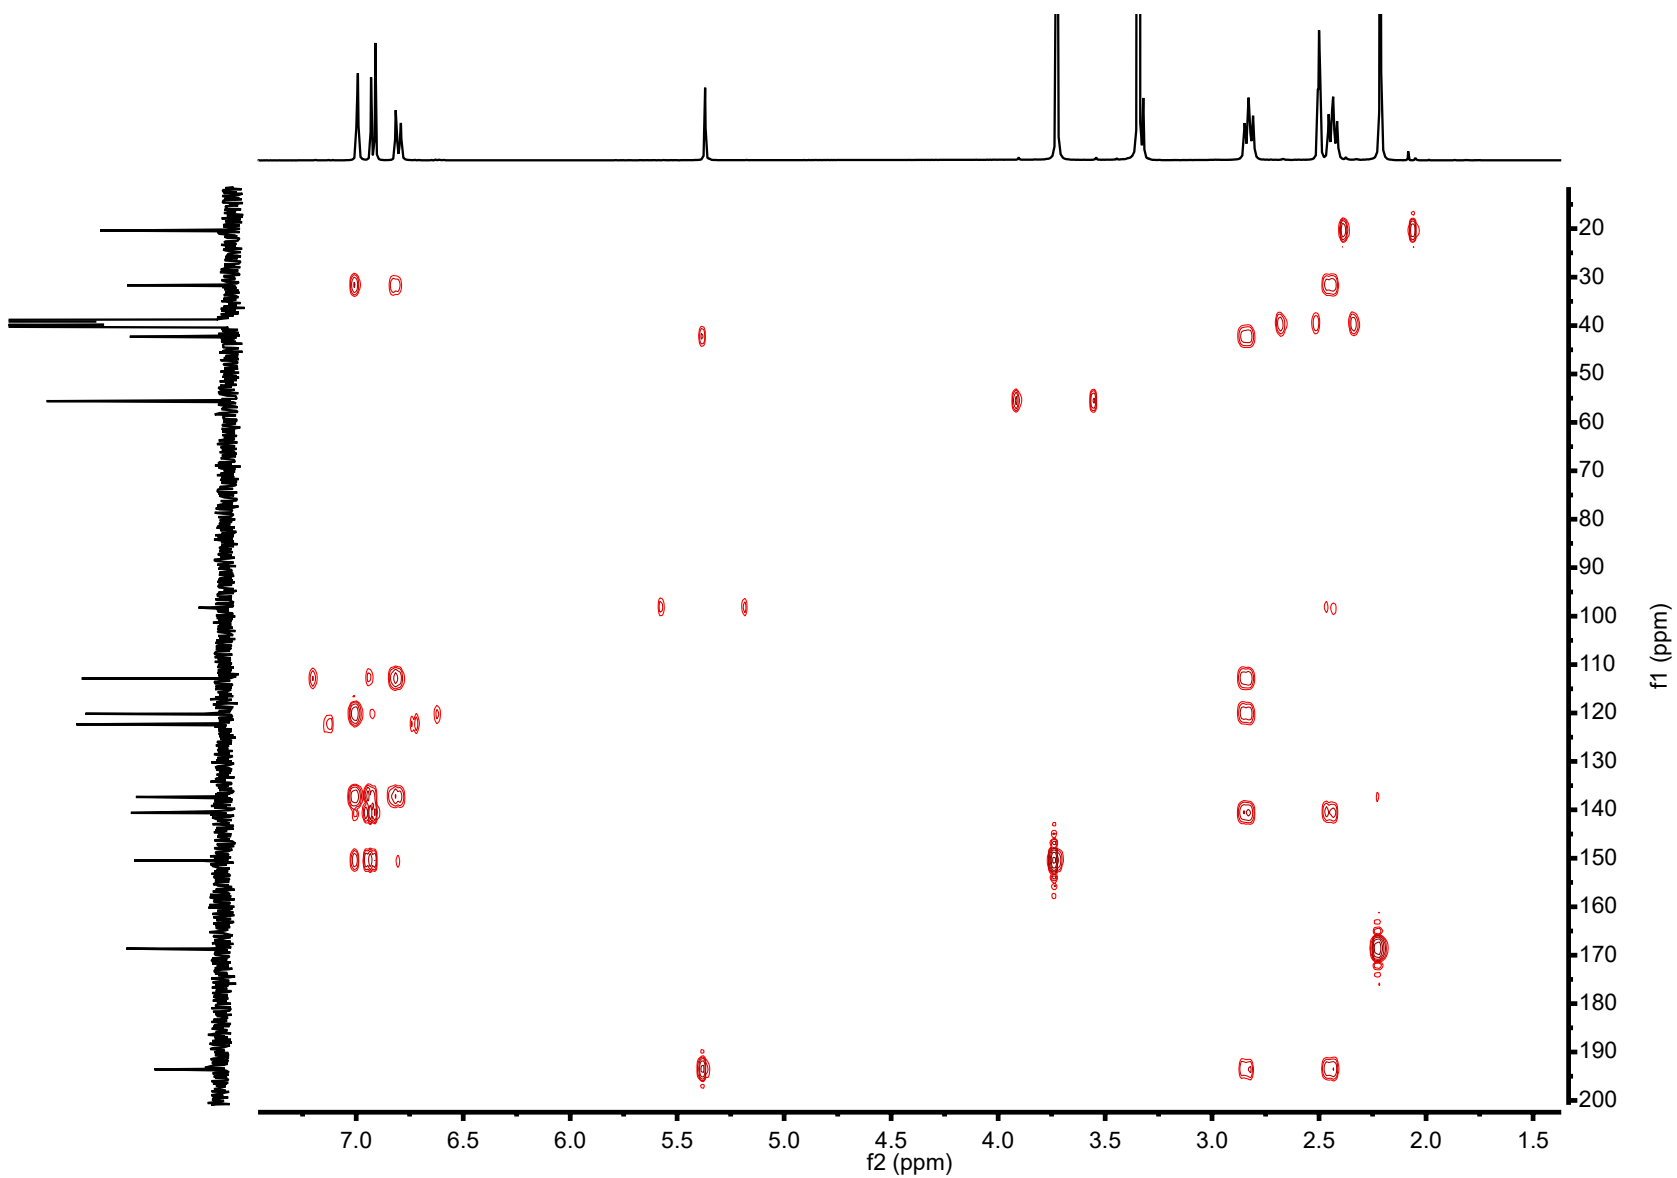

**Fig S23.** 500 MHz HMBC NMR spectrum of DACH-Zn.

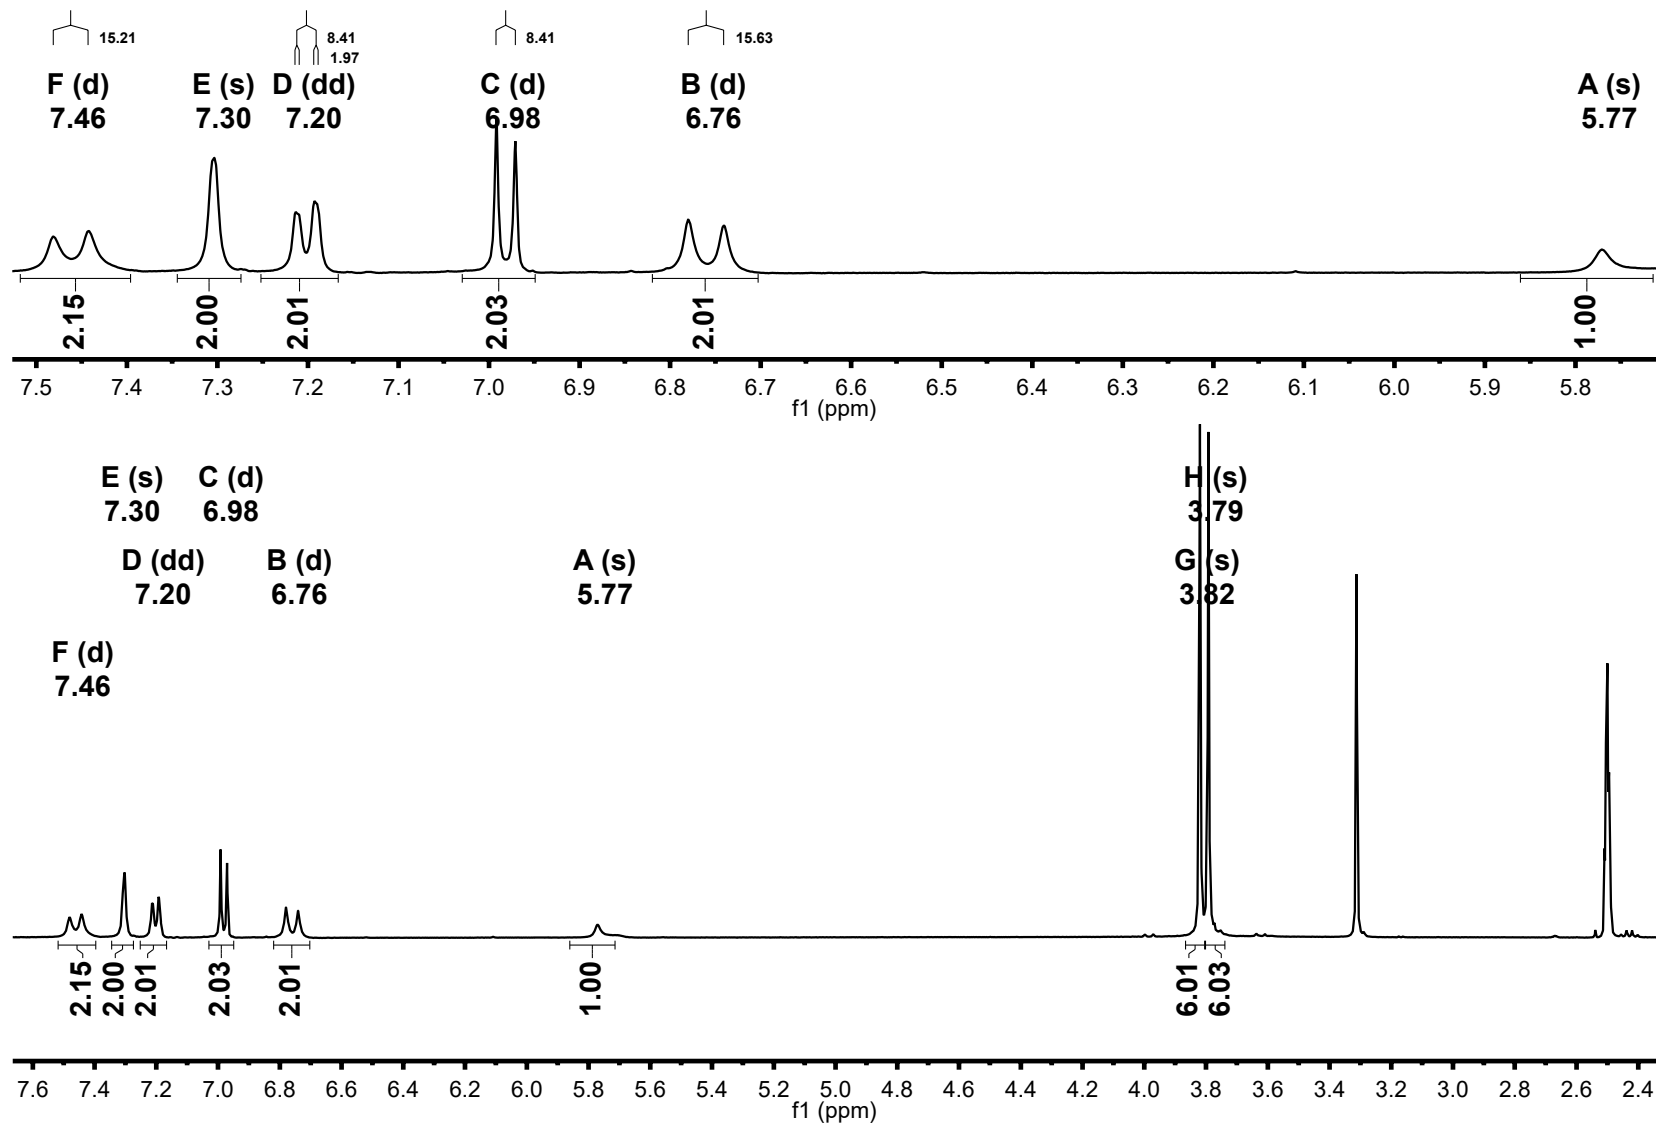

**Fig S24.** 500 MHz  $^1\text{H}$  NMR spectrum of DiMeOC-Zn.

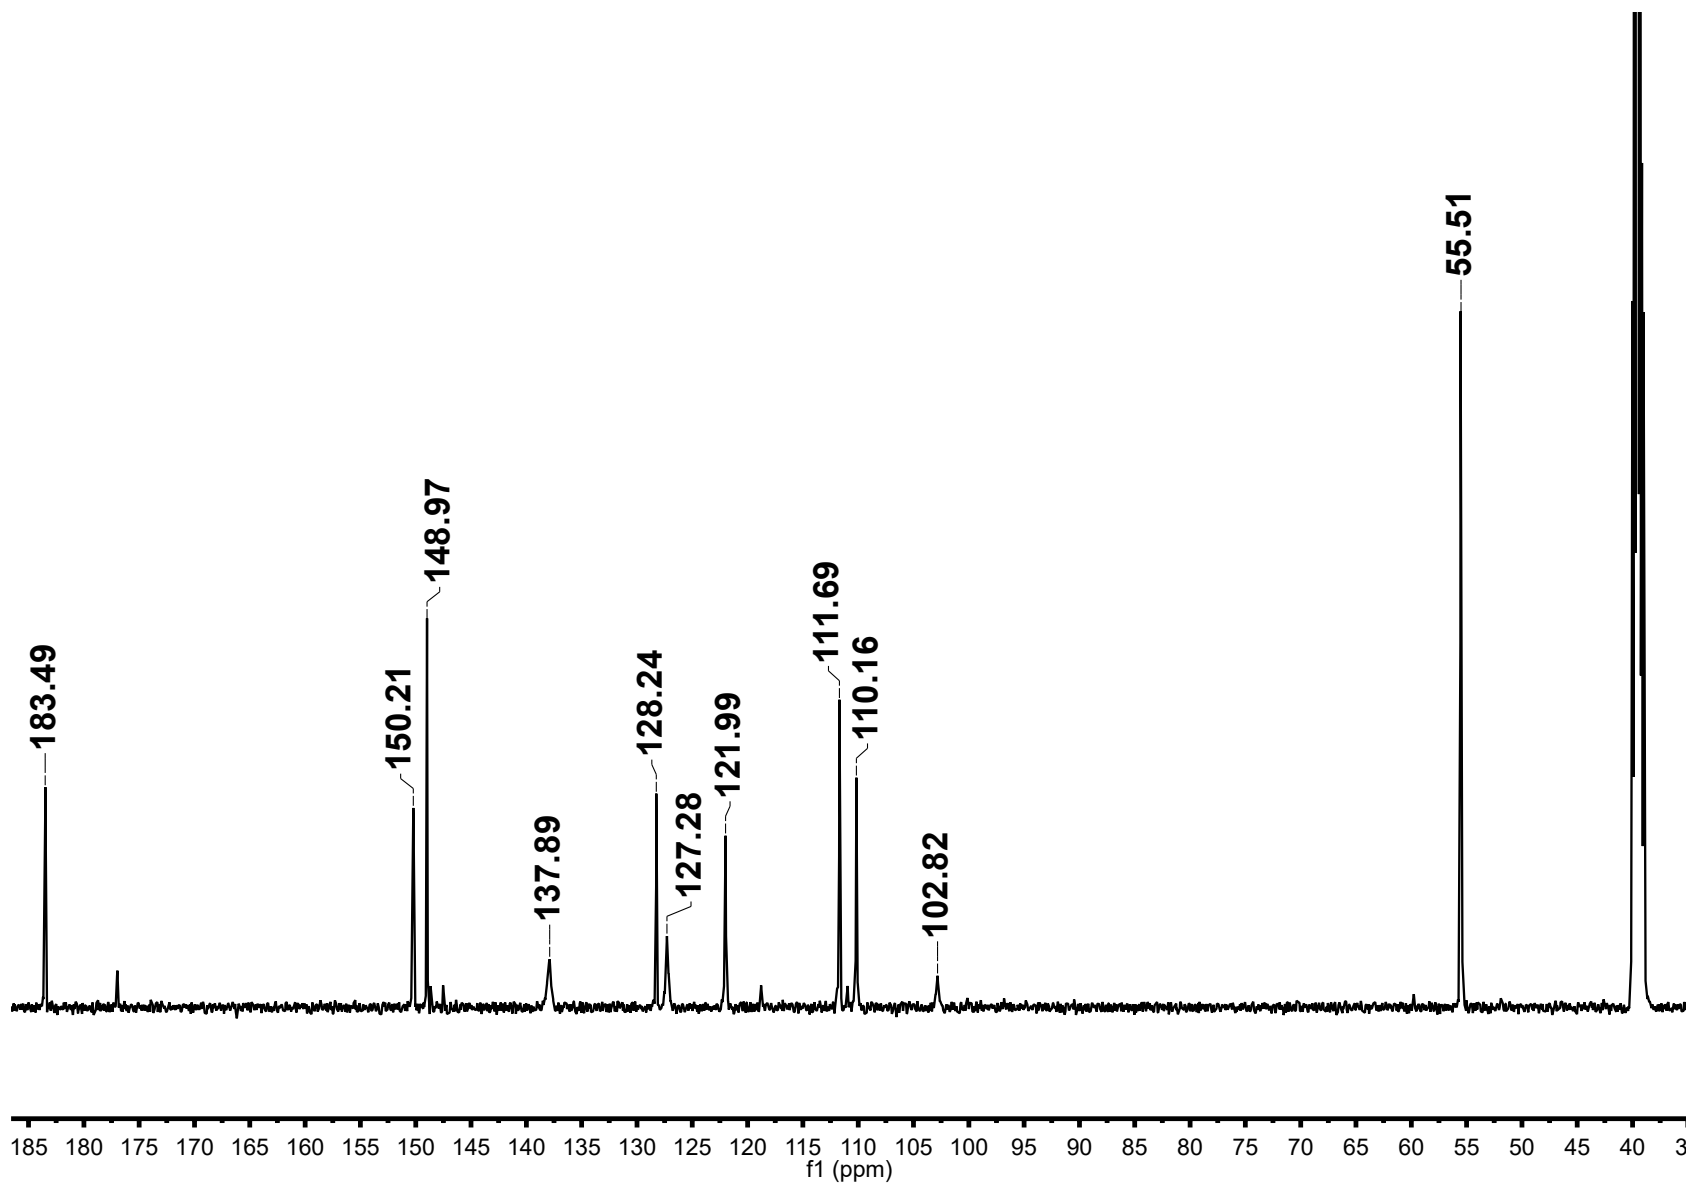

Fig S25. 125 MHz  $^{13}\text{C}$  NMR spectrum of DiMeOC-Zn.

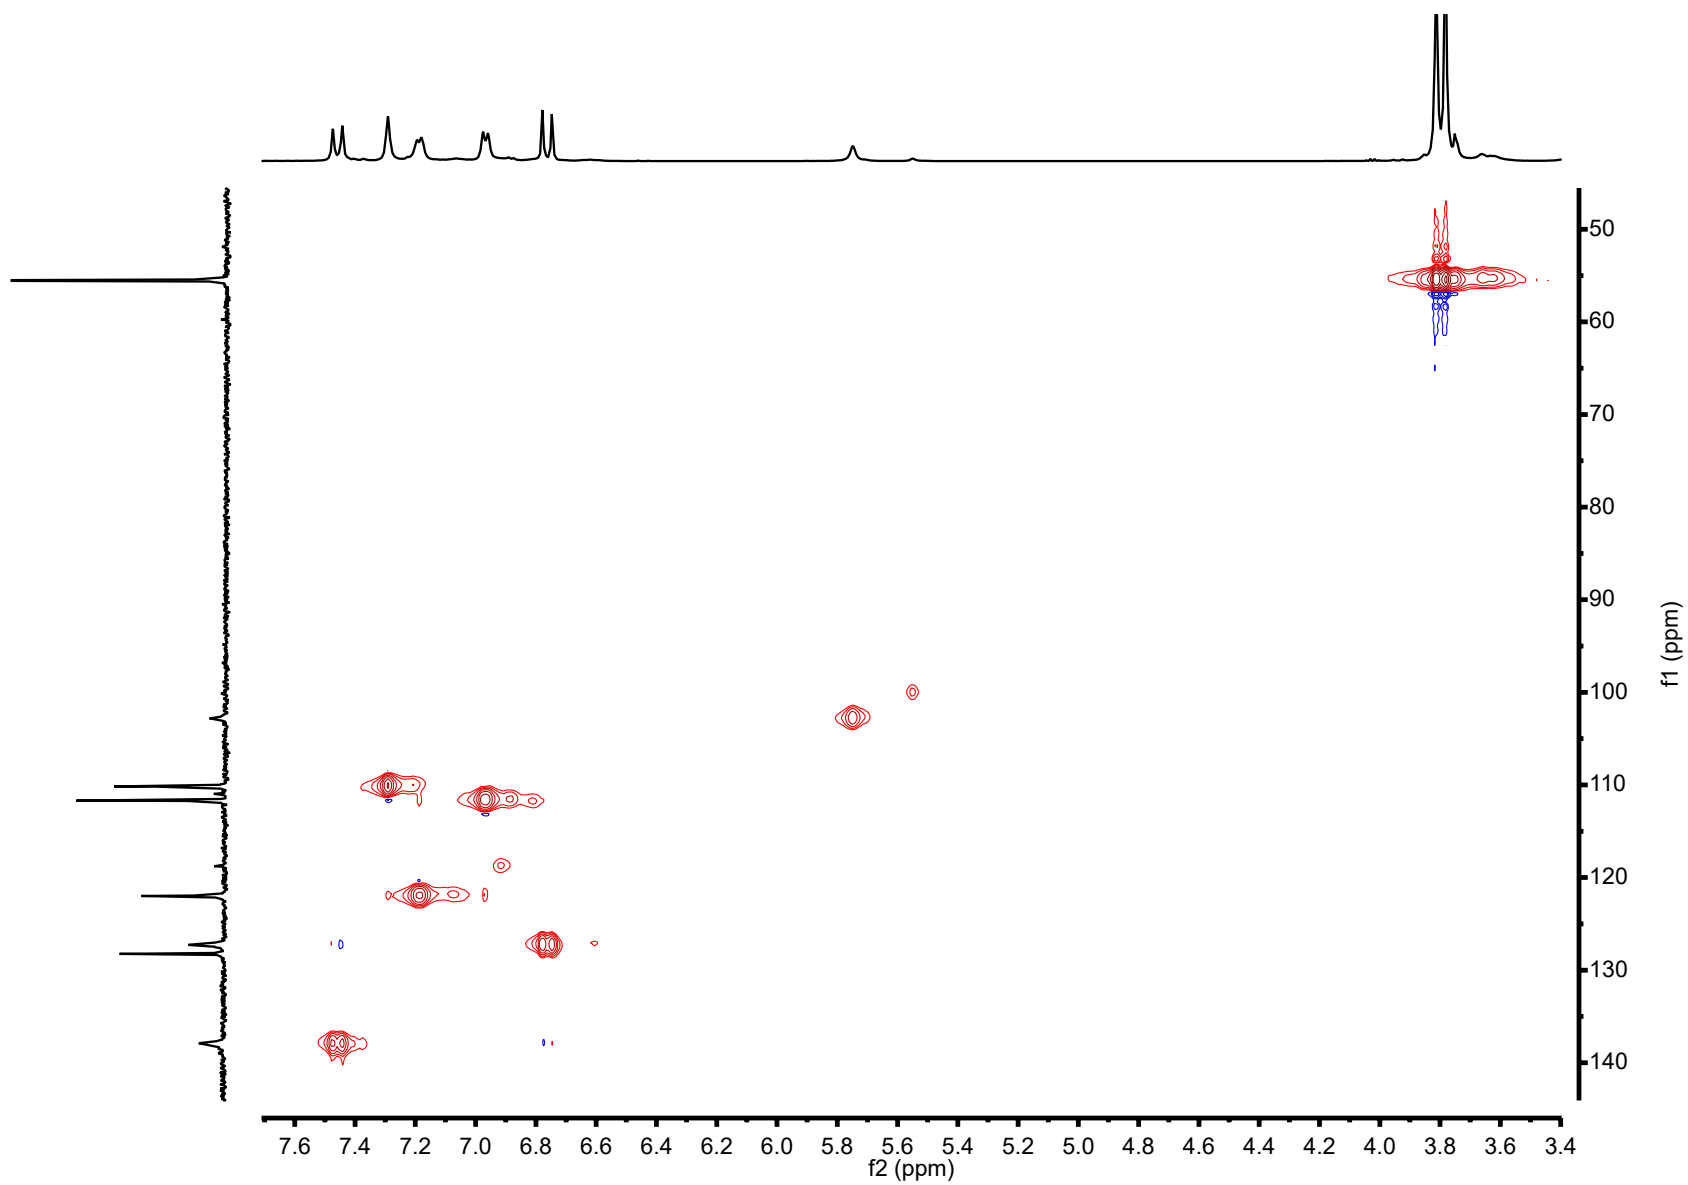

**Fig S26.** 500 MHz HSQC NMR spectrum of DiMeOC-Zn.

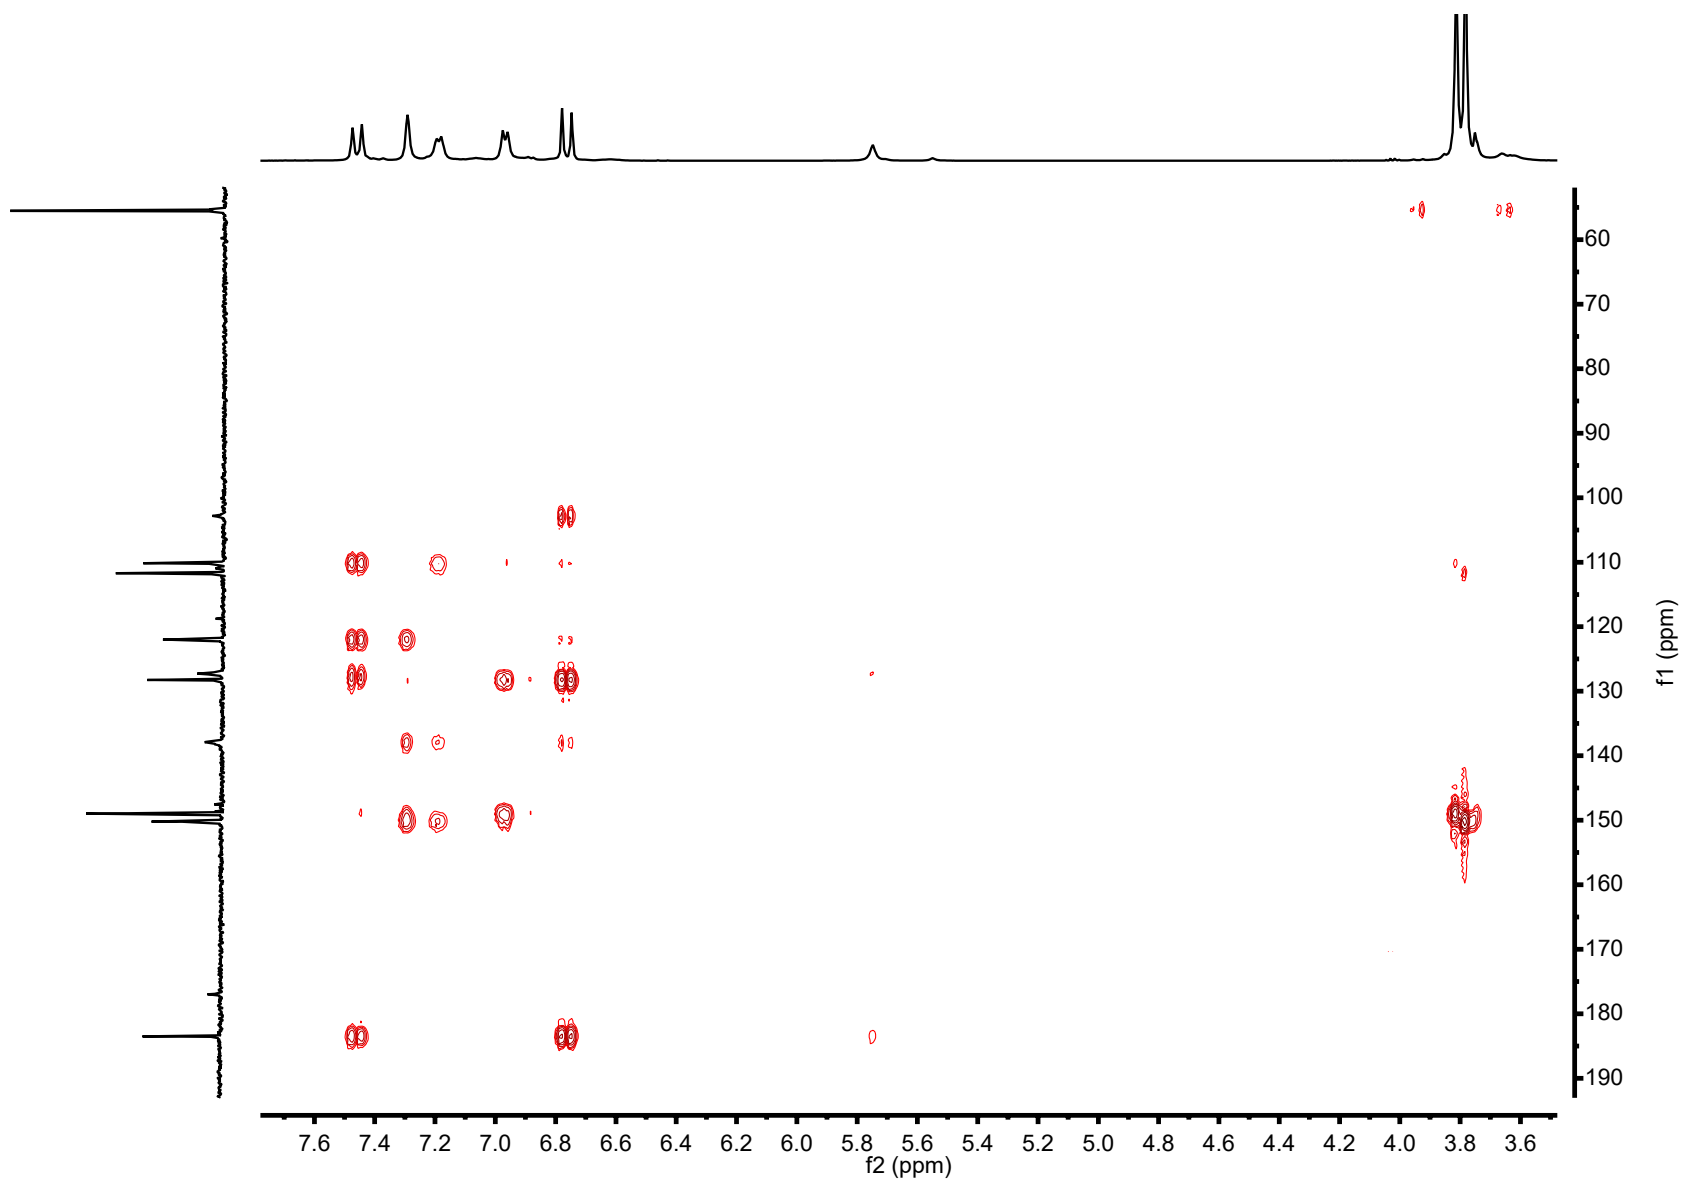

**Fig S27.** 500 MHz HMBC NMR spectrum of DiMeOC-Zn.

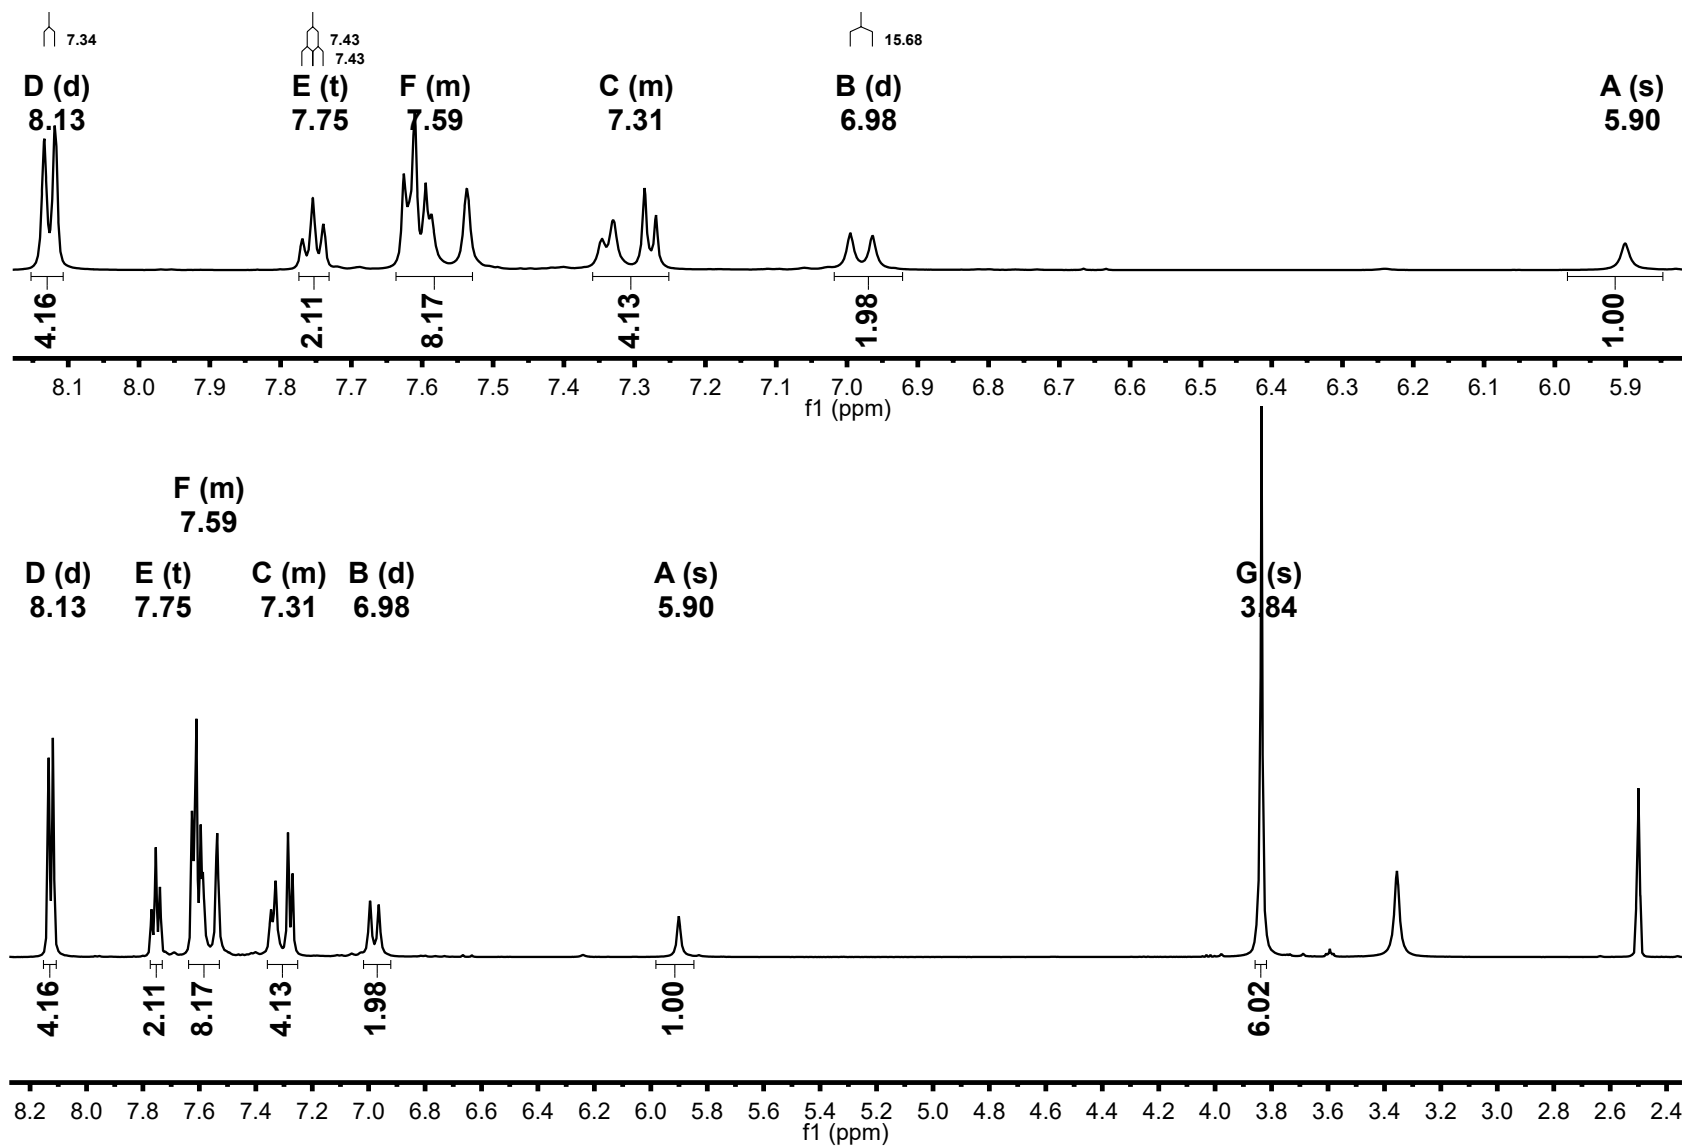

Fig S28. 500 MHz <sup>1</sup>H NMR spectrum of DiBzOC-Zn.

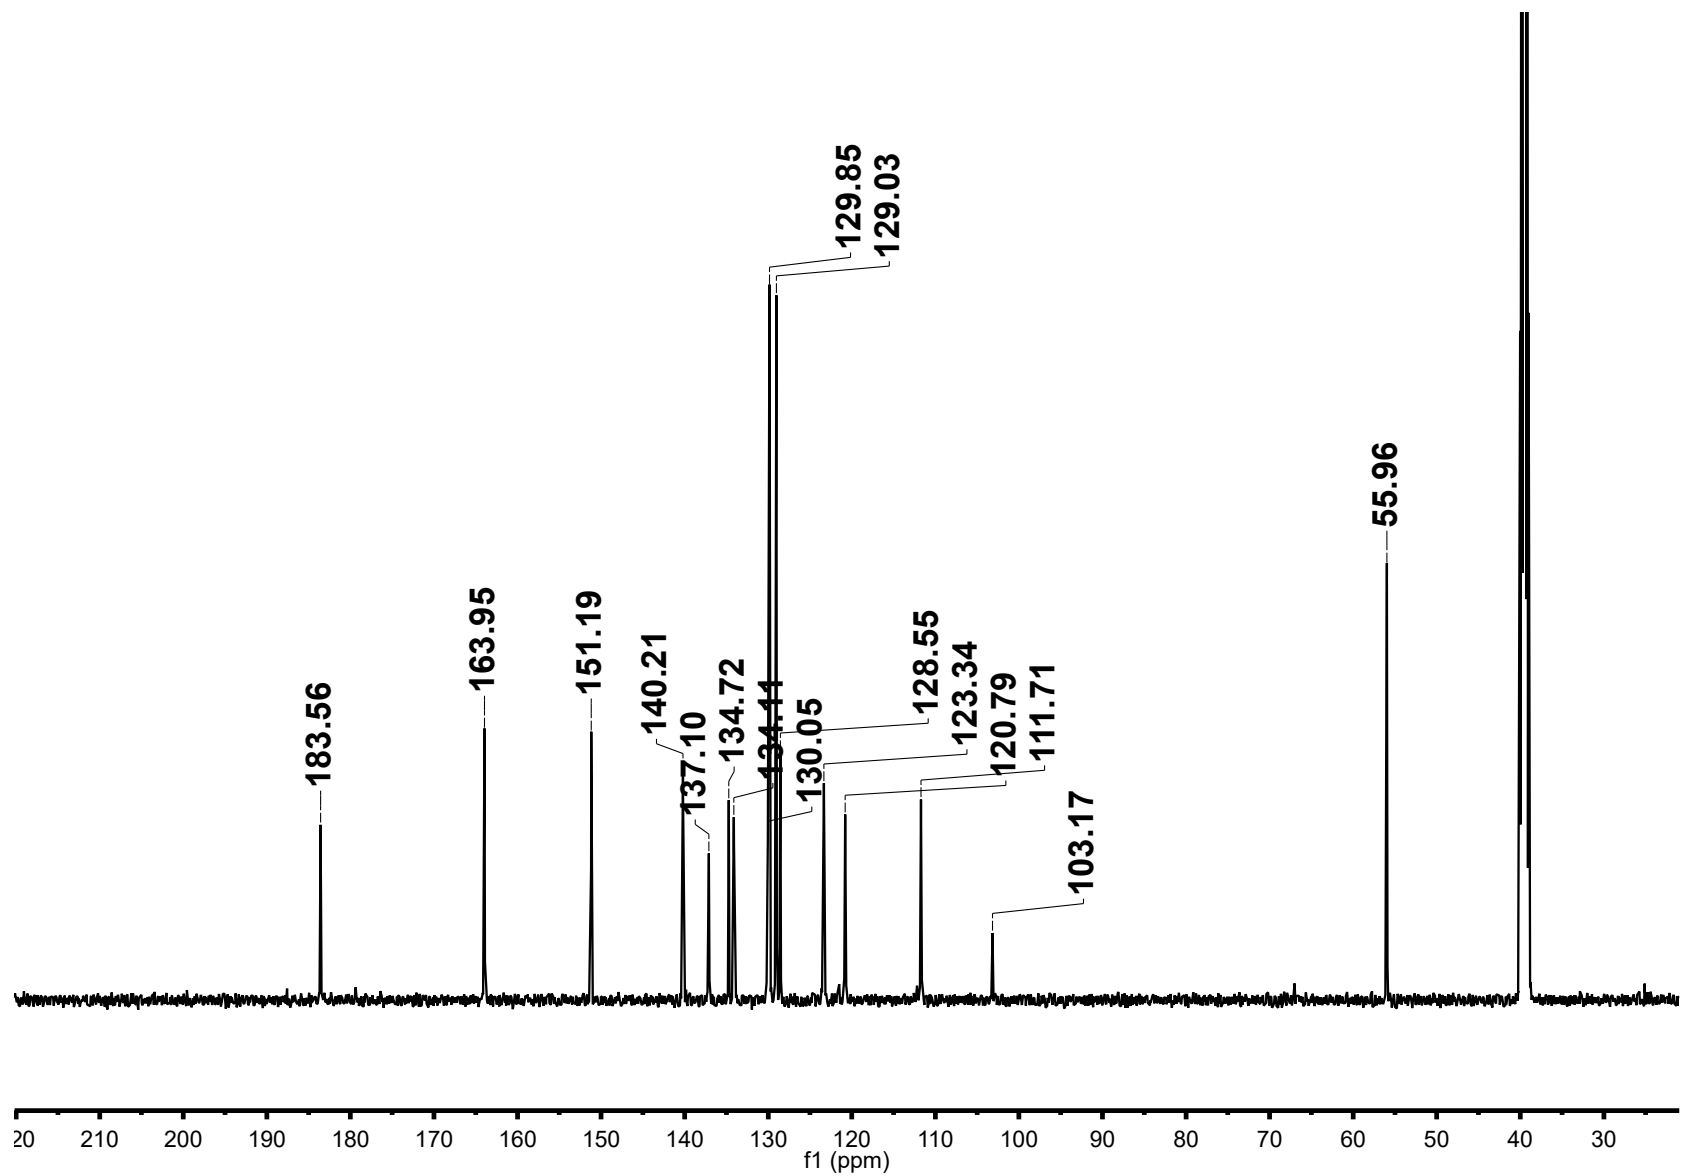

Fig S29. 125 MHz  $^{13}\text{C}$  NMR spectrum of DiBzOC-Zn.



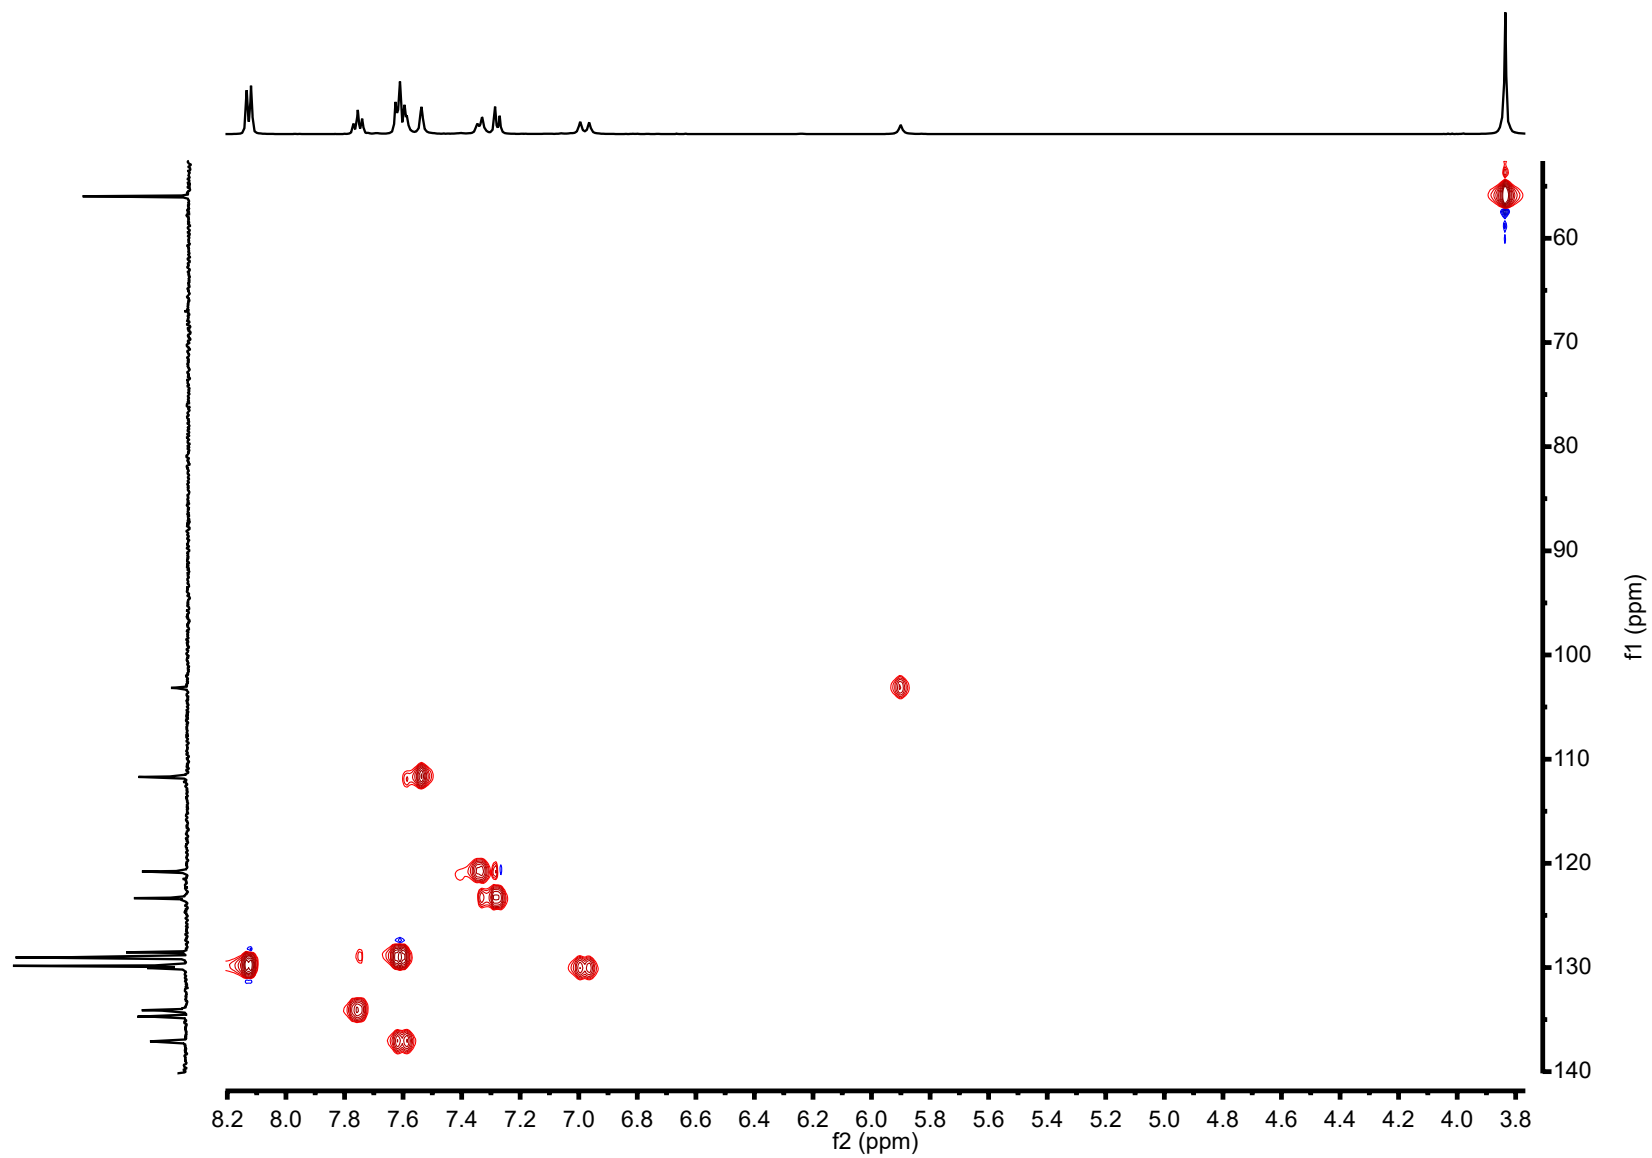

**Fig S30.** 500 MHz HSQC NMR spectrum of DiBzO-Zn.

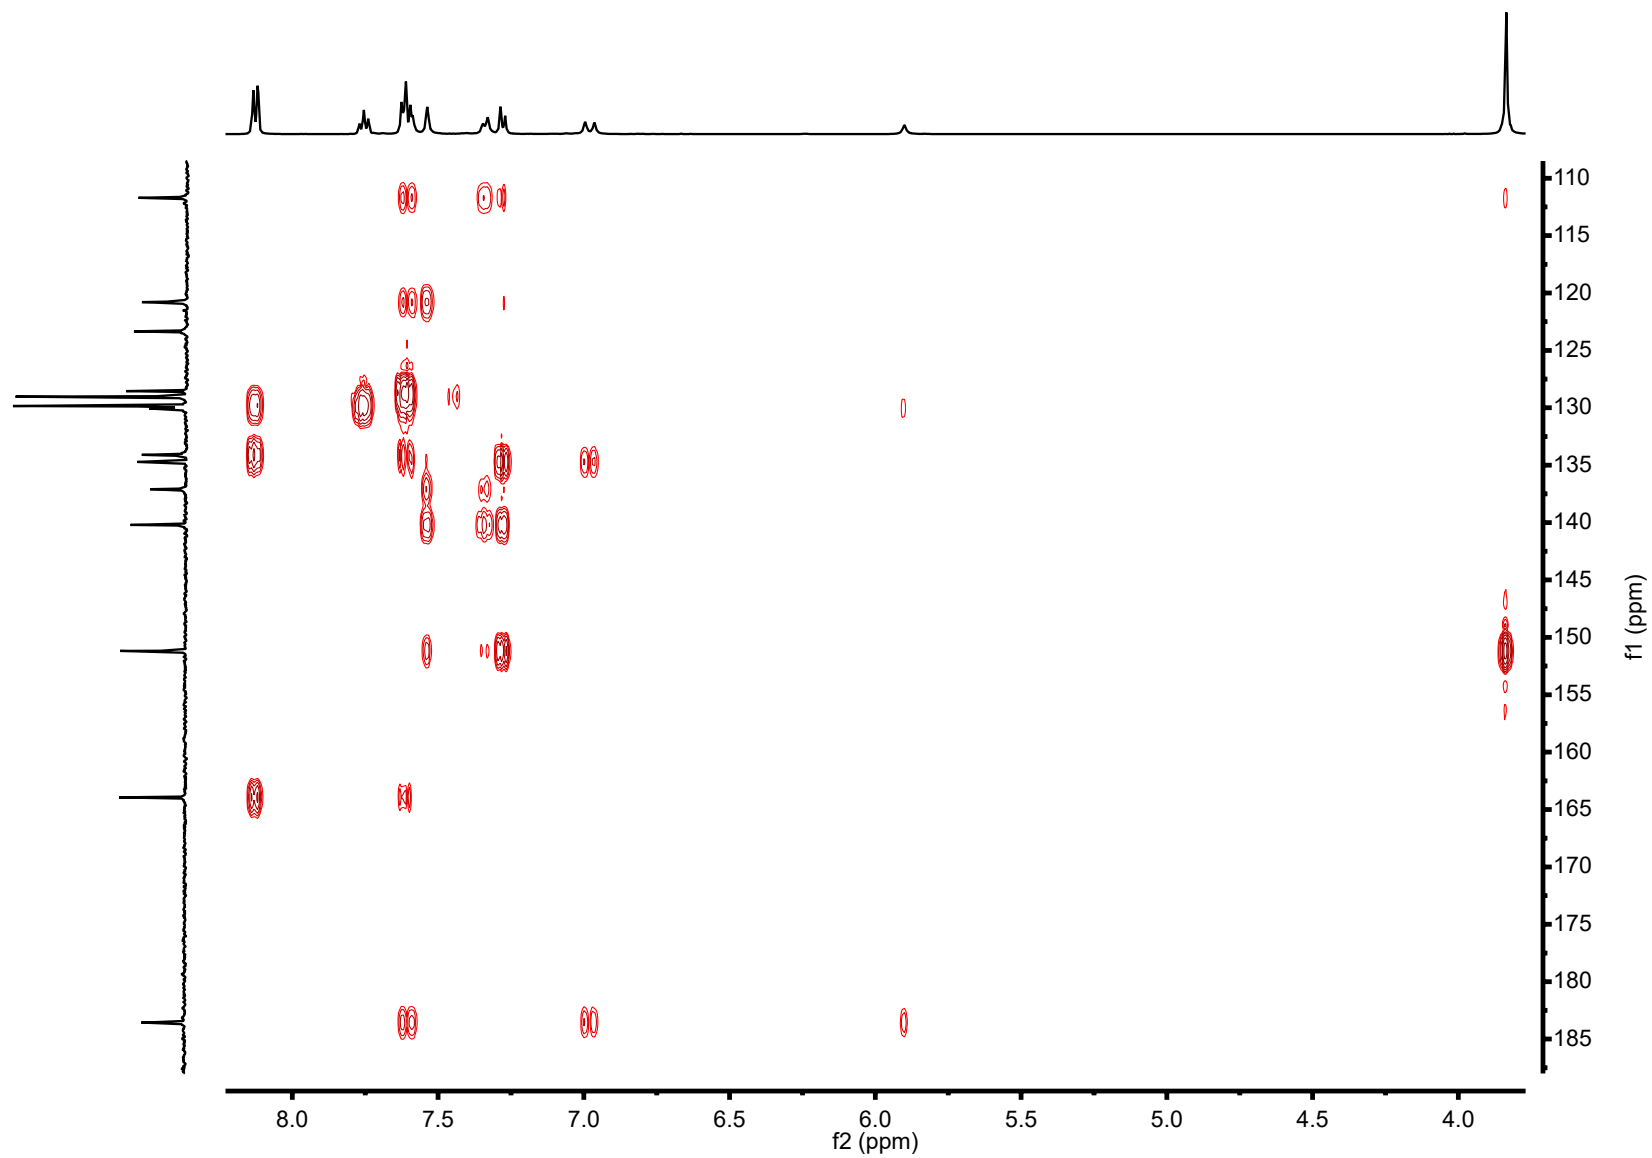

**Fig S31.** 500 MHz HMBC NMR spectrum of DiBzOC-Zn.

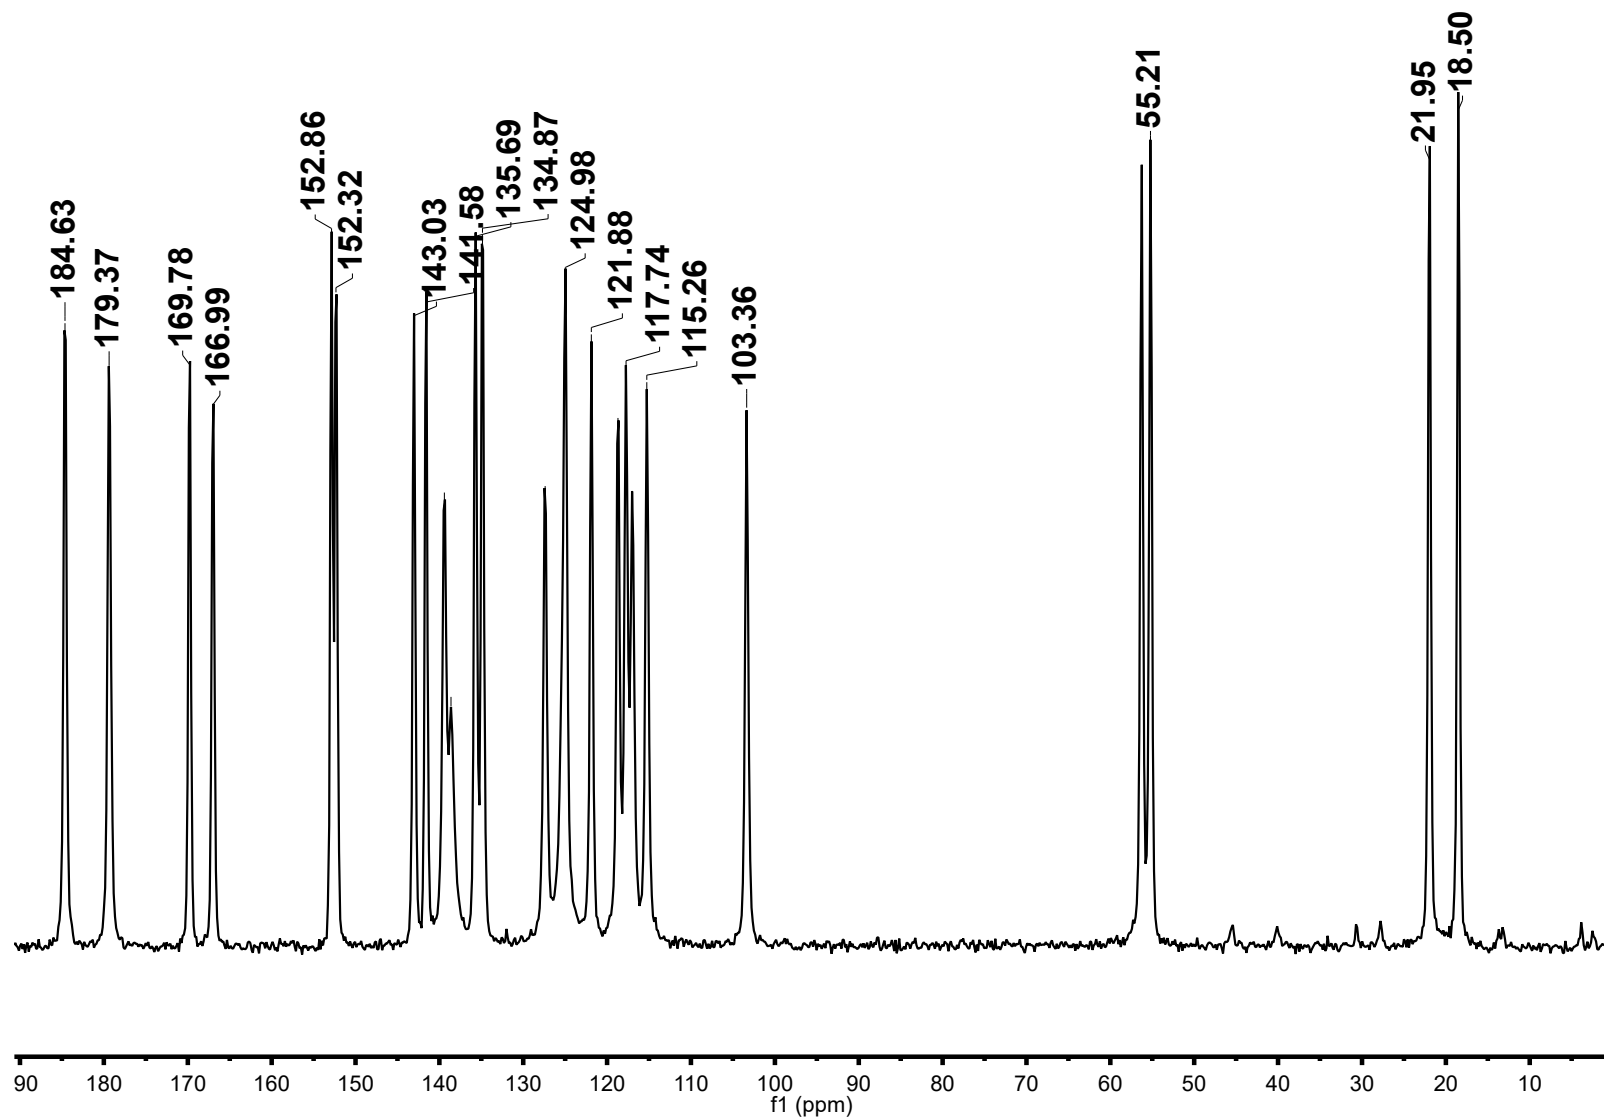

Fig S32. 100 MHz <sup>13</sup>C ssNMR spectrum of DAC.

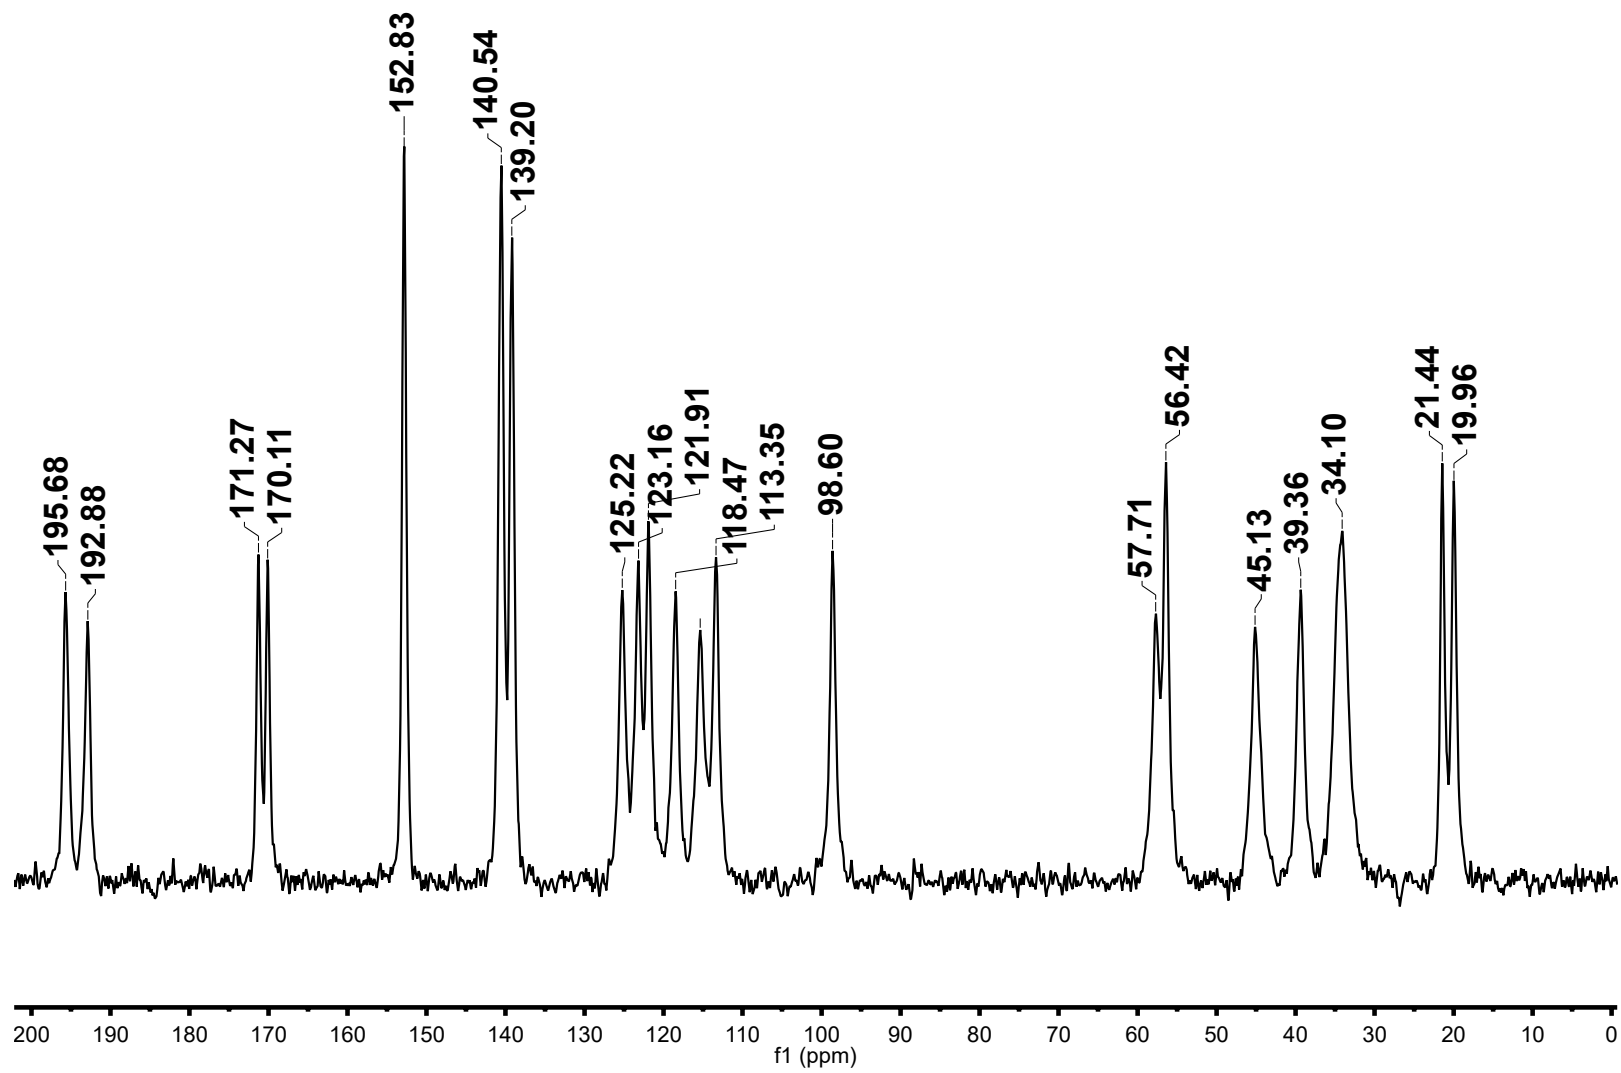

Fig S33. 150 MHz  $^{13}\text{C}$  ssNMR spectrum of DACH.

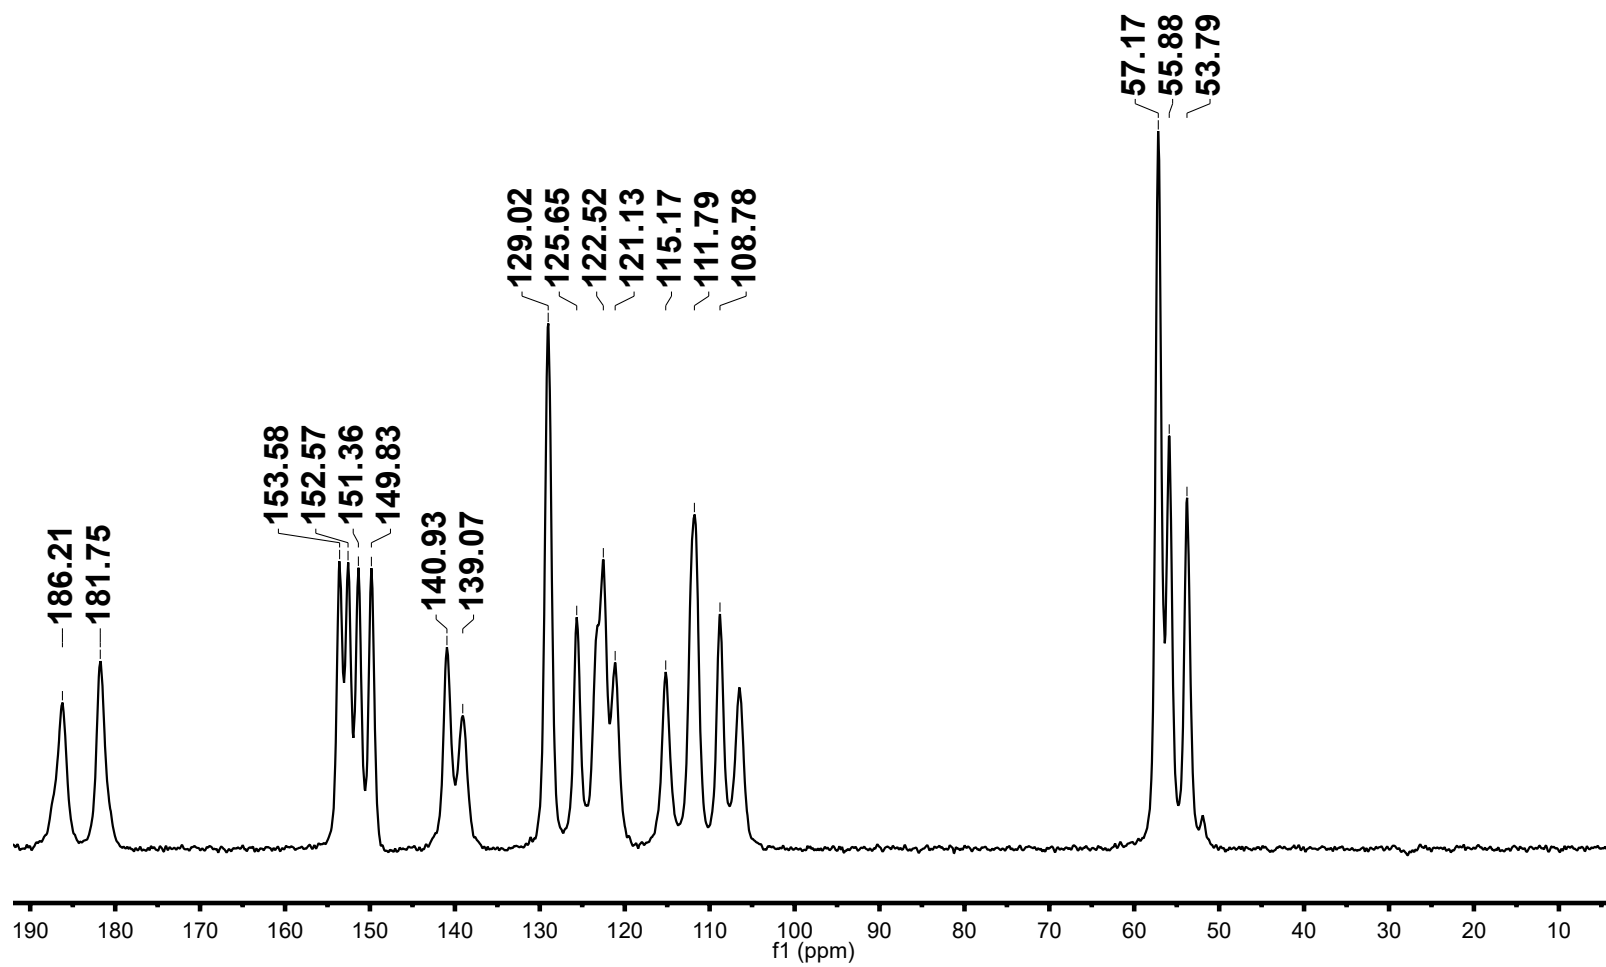

**Fig S34.** 150 MHz  $^{13}\text{C}$  ssNMR spectrum of DiMeOC.

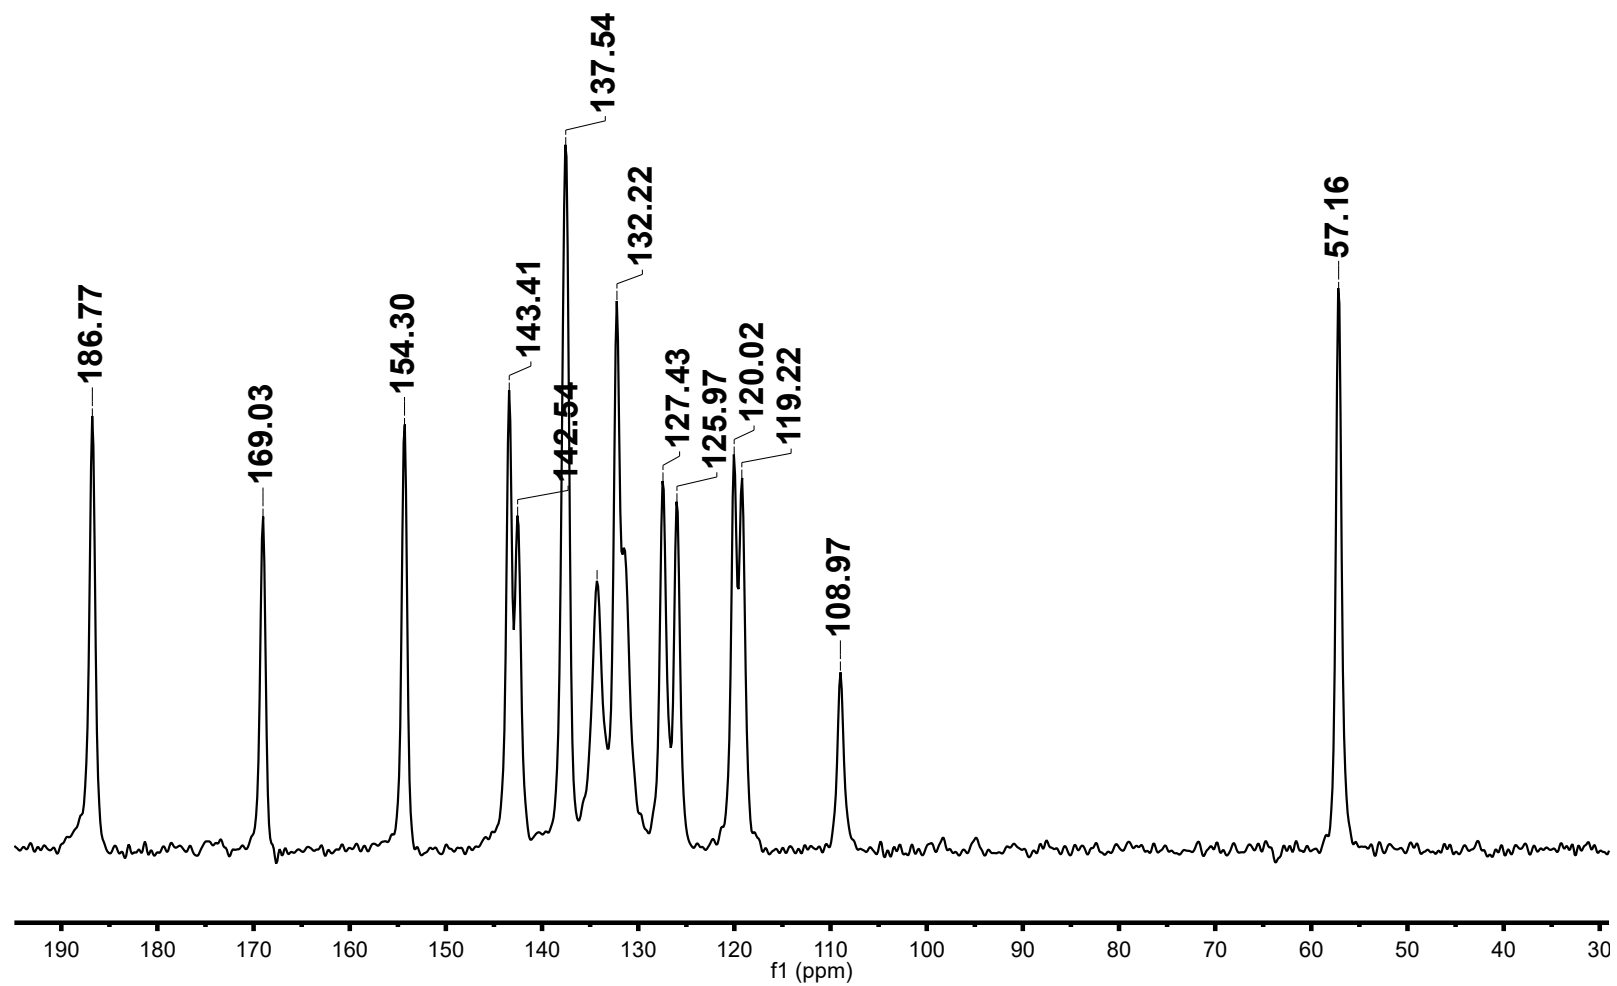

Fig S35. 150 MHz  $^{13}\text{C}$  ssNMR spectrum of DiBzOC.

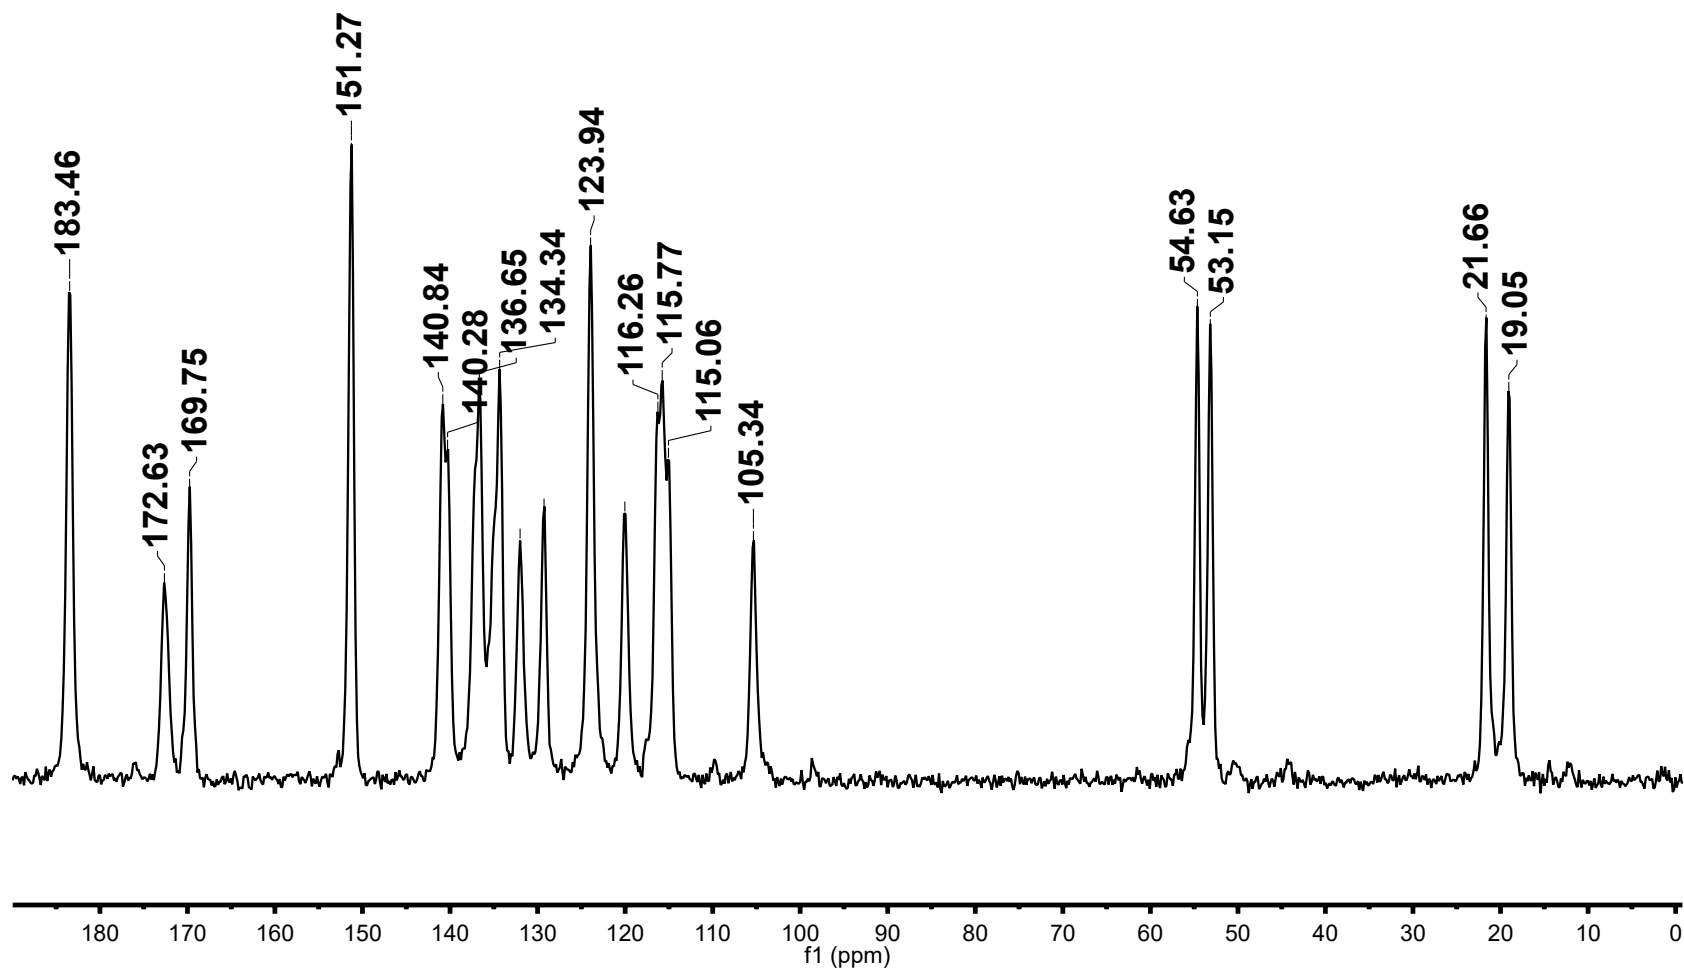

Fig S36. 100 MHz <sup>13</sup>C ssNMR spectrum of DAC-Zn.

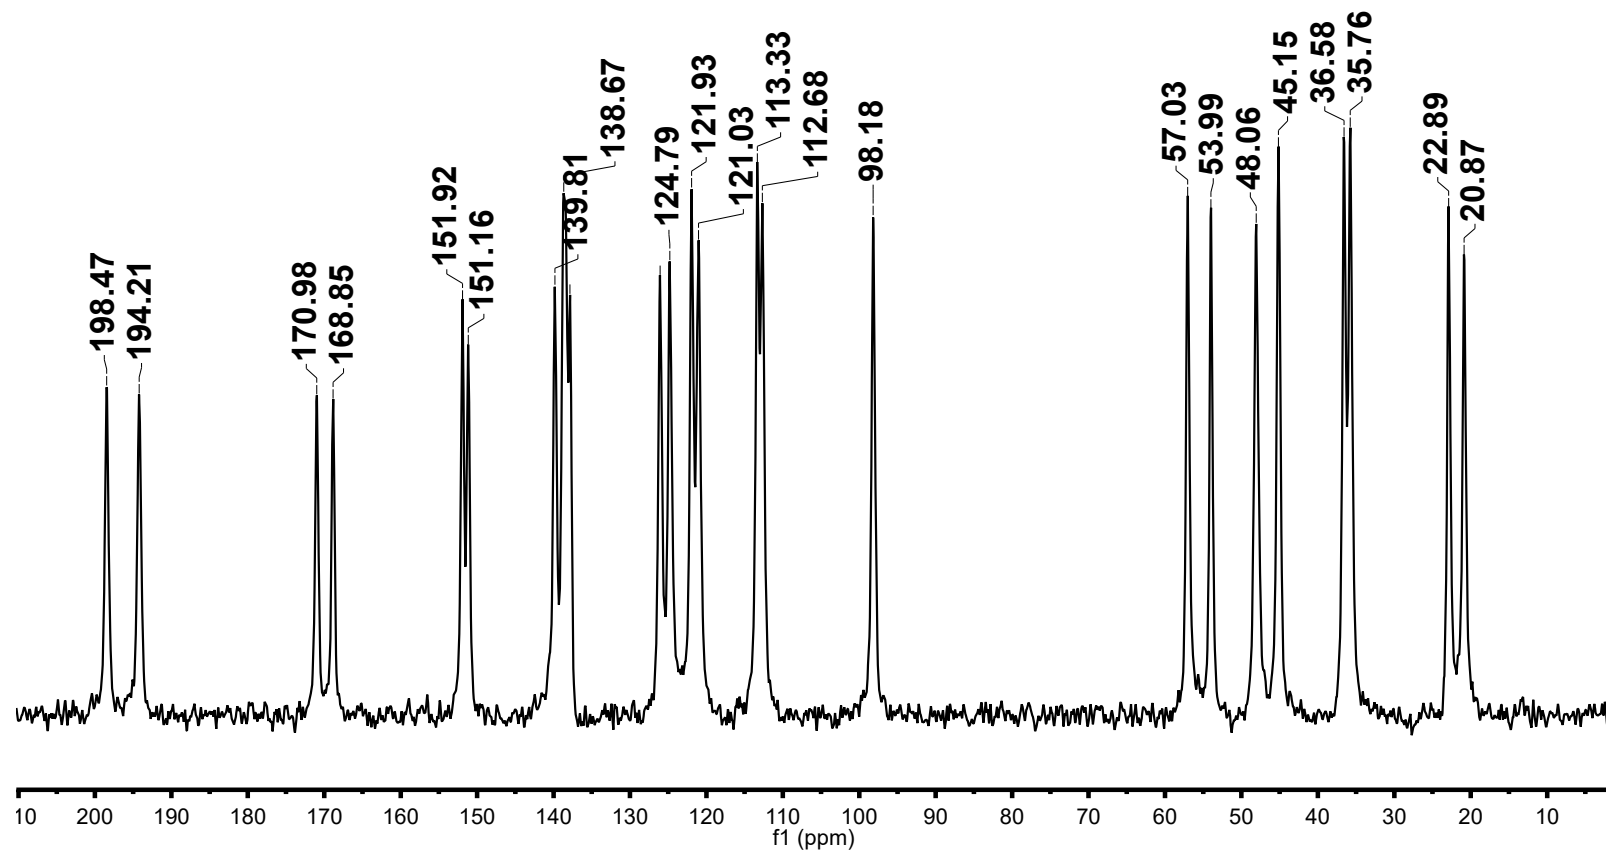

Fig S37. 150 MHz  $^{13}\text{C}$  ssNMR spectrum of DACH-Zn.



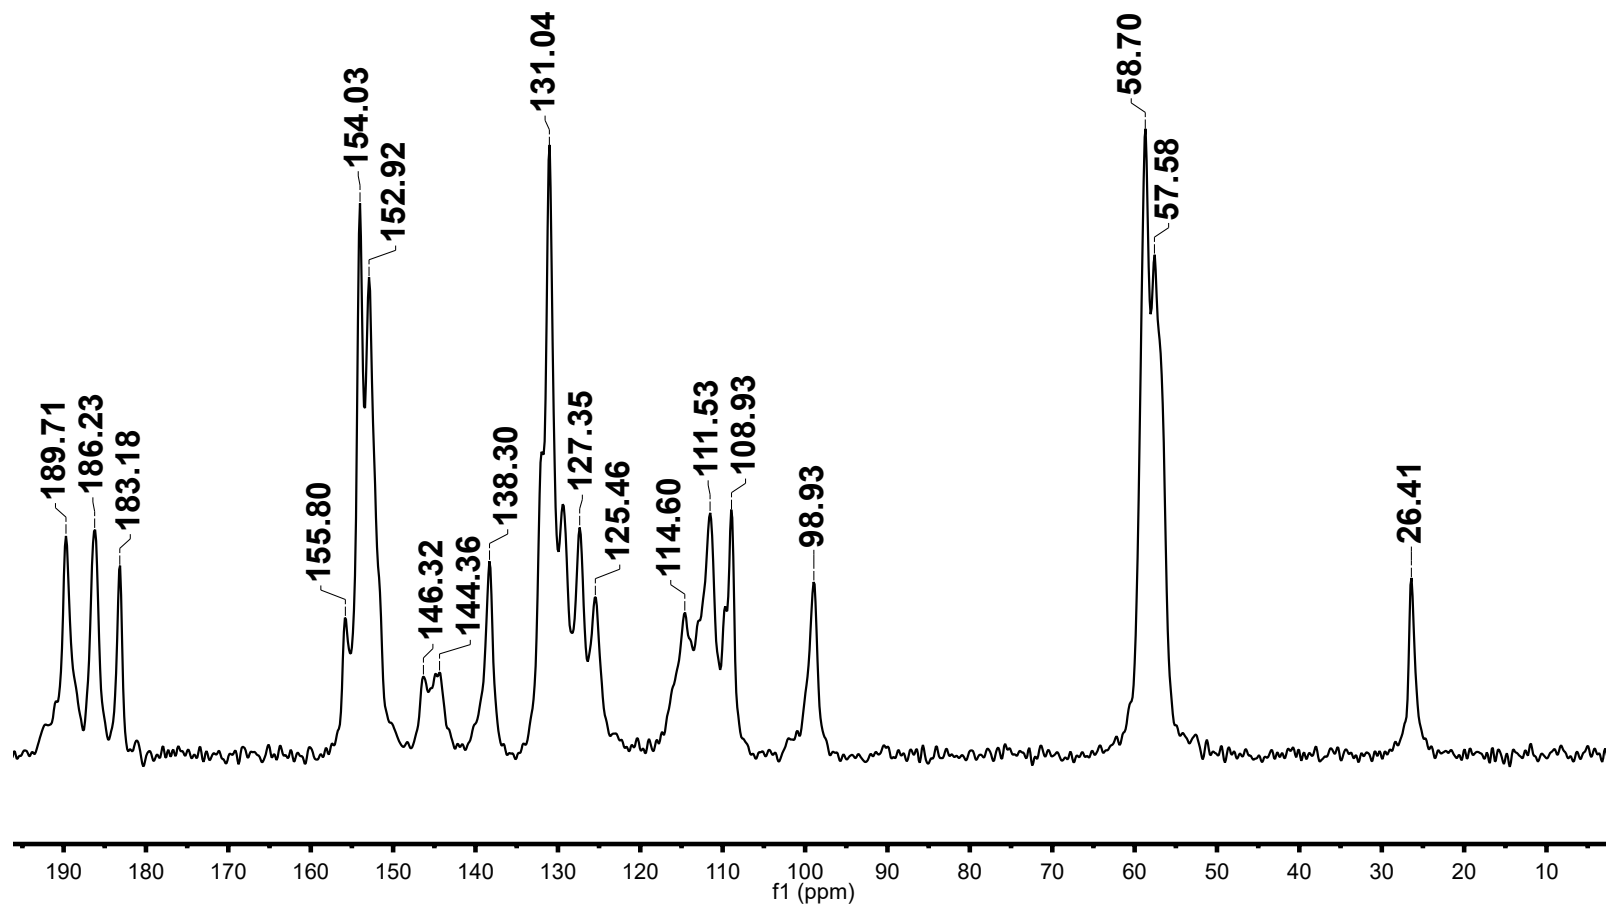

Fig S38. 150 MHz  $^{13}\text{C}$  ssNMR spectrum of DiMeOC-Zn.

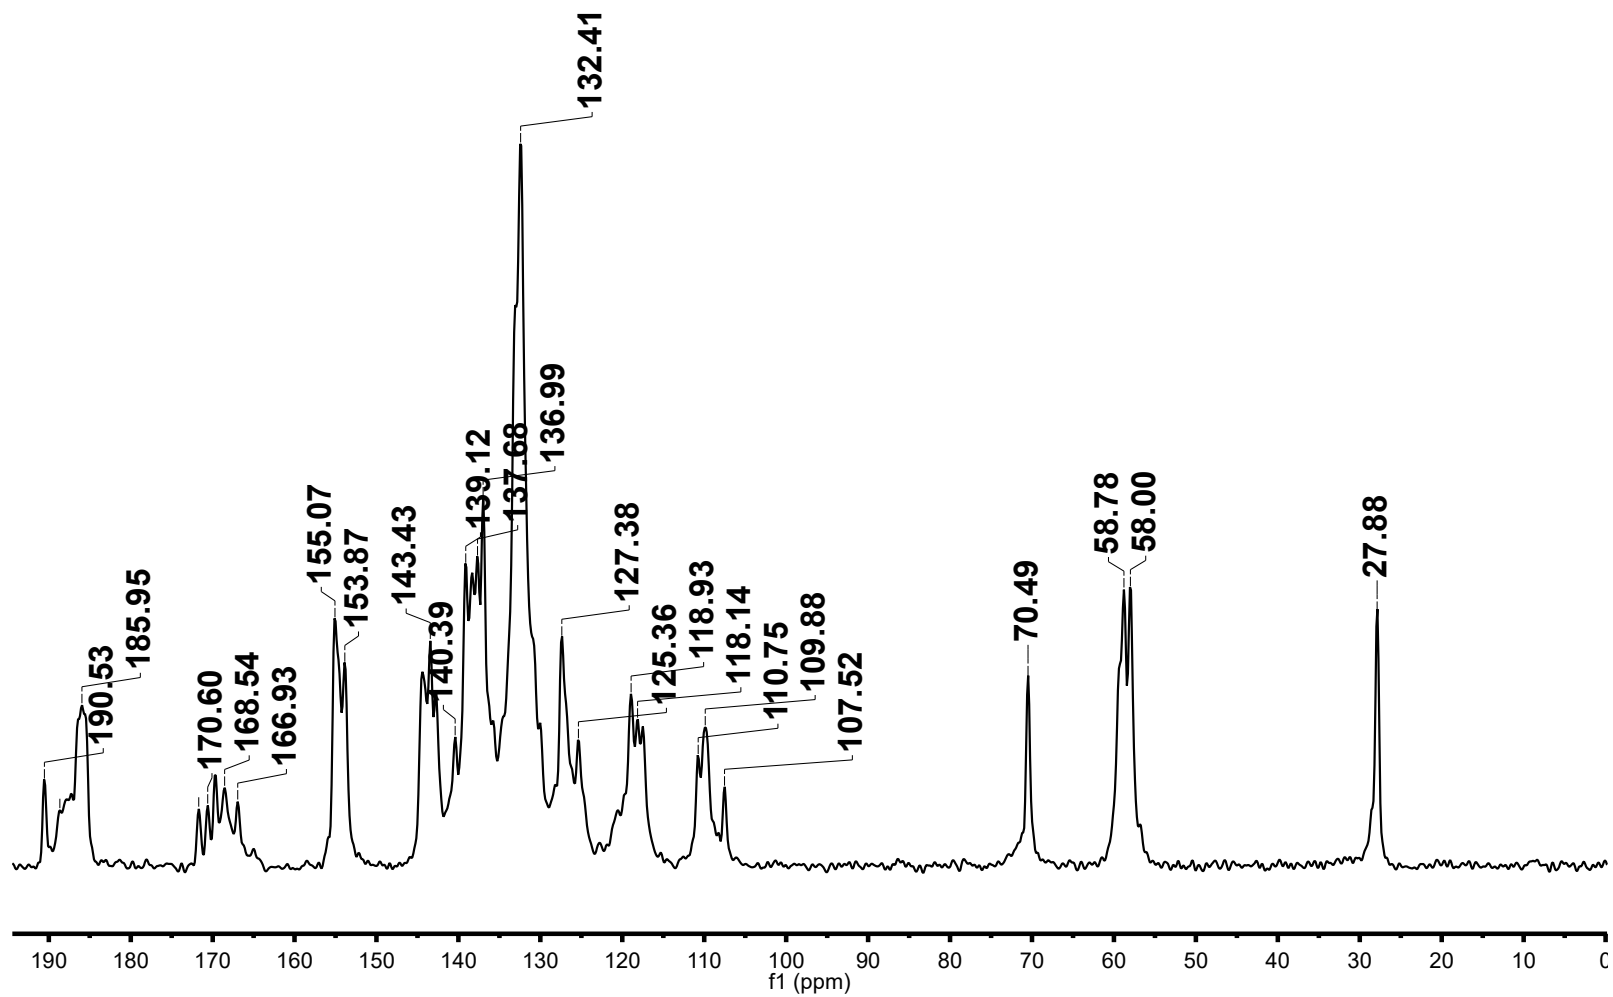

Fig S39. 150 MHz  $^{13}\text{C}$  ssNMR spectrum of DiBzOC-Zn.

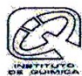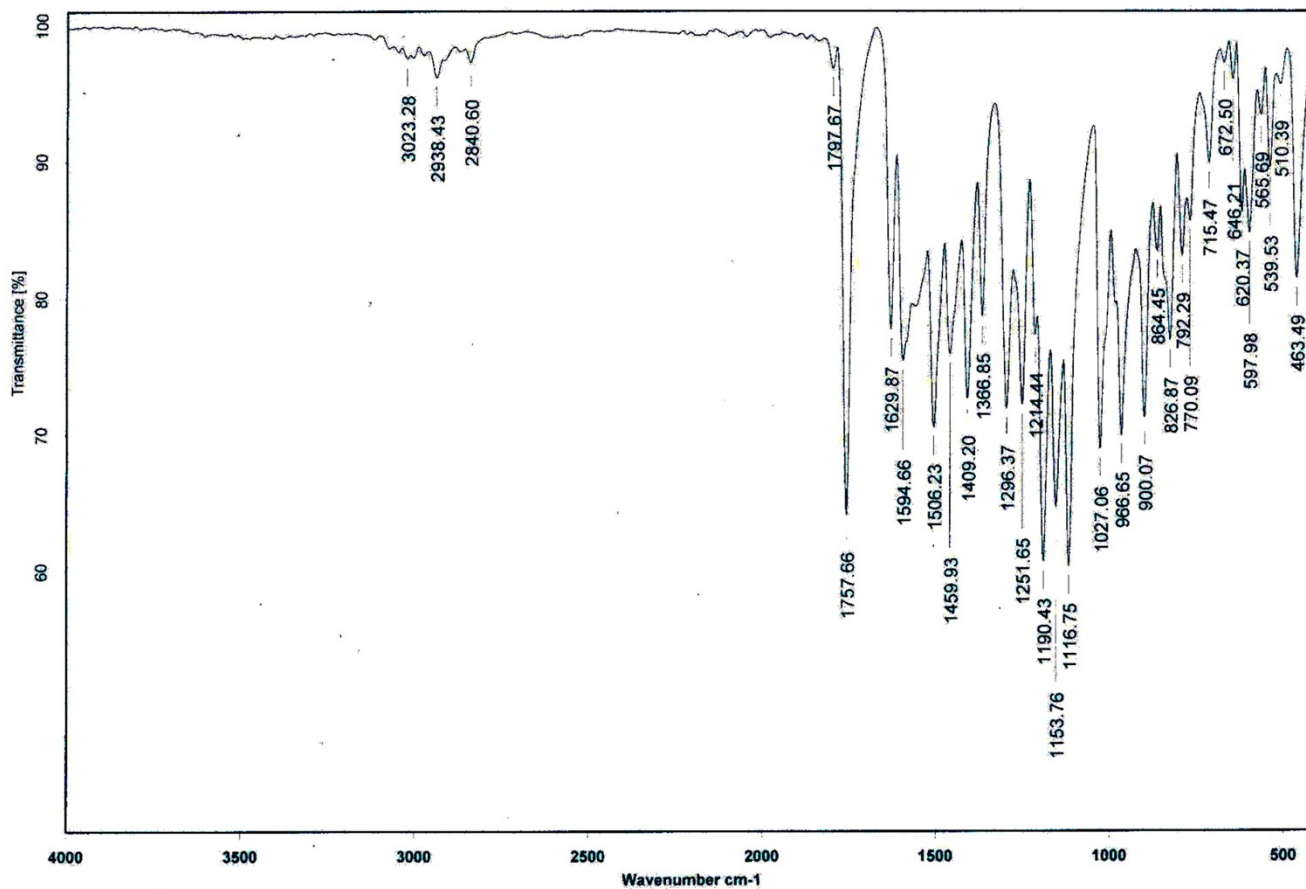

C:\INFRARROJO\AIR-LEP-IQUI-006\_16\DrR.Enriquez\1124.0

Dr.R.Enriquez

DAC

KBr/Pastilla

RPN

10/06/2016

Fig S40. IR Spectrum of DAC.

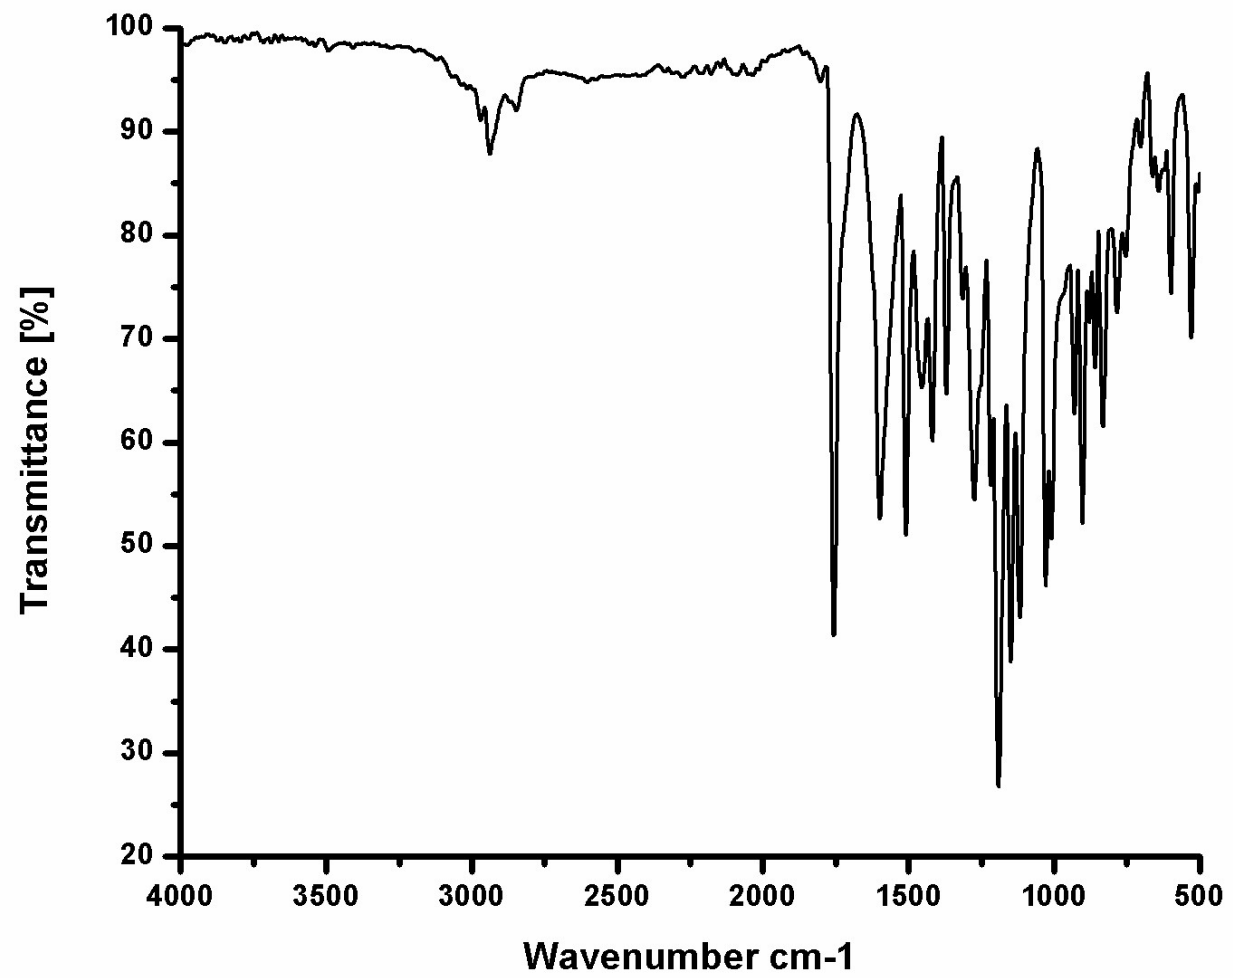

Fig S41. IR Spectrum of DACH.

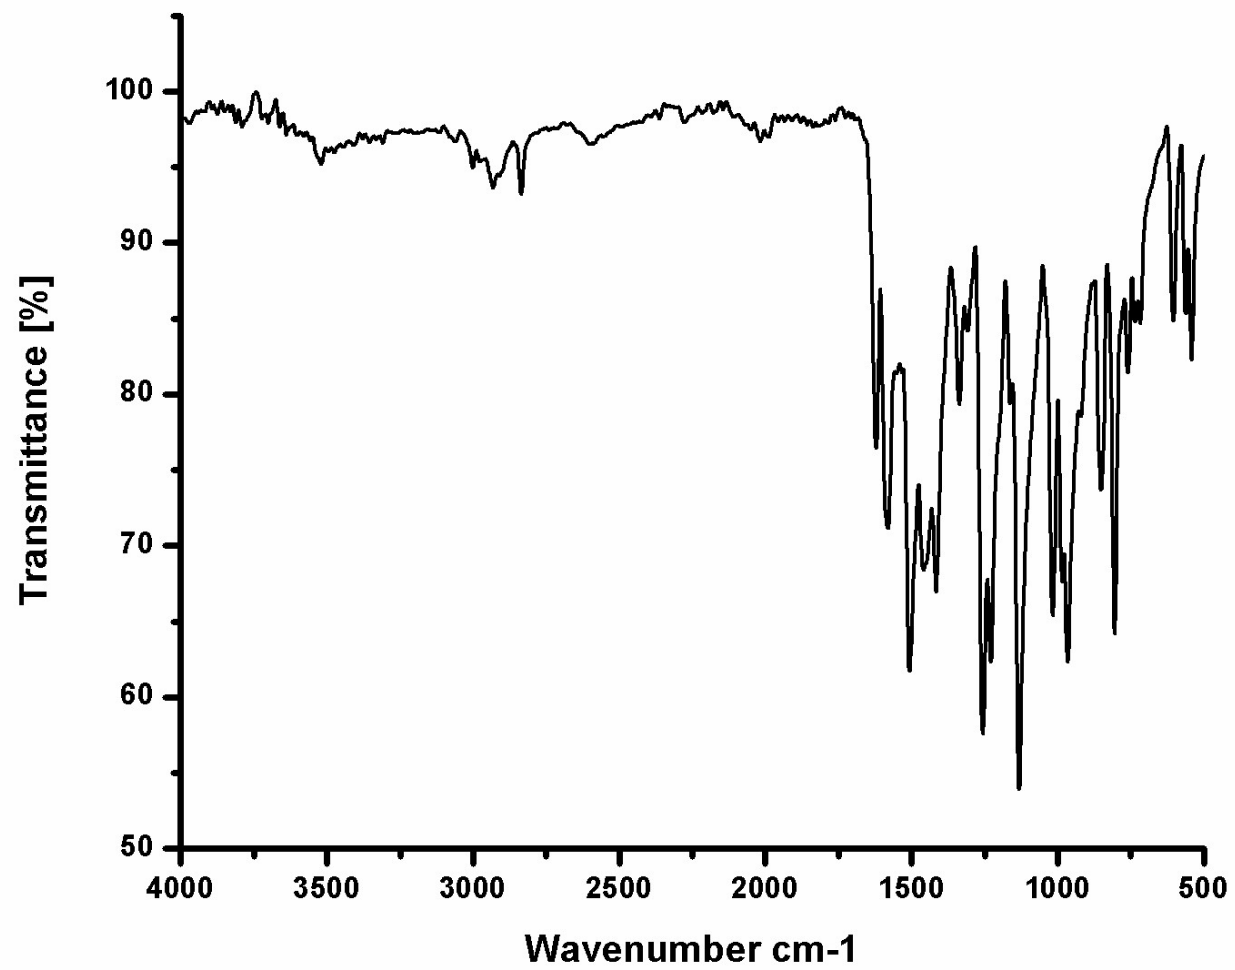

Fig S42. IR Spectrum of DiMeOC.

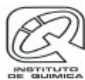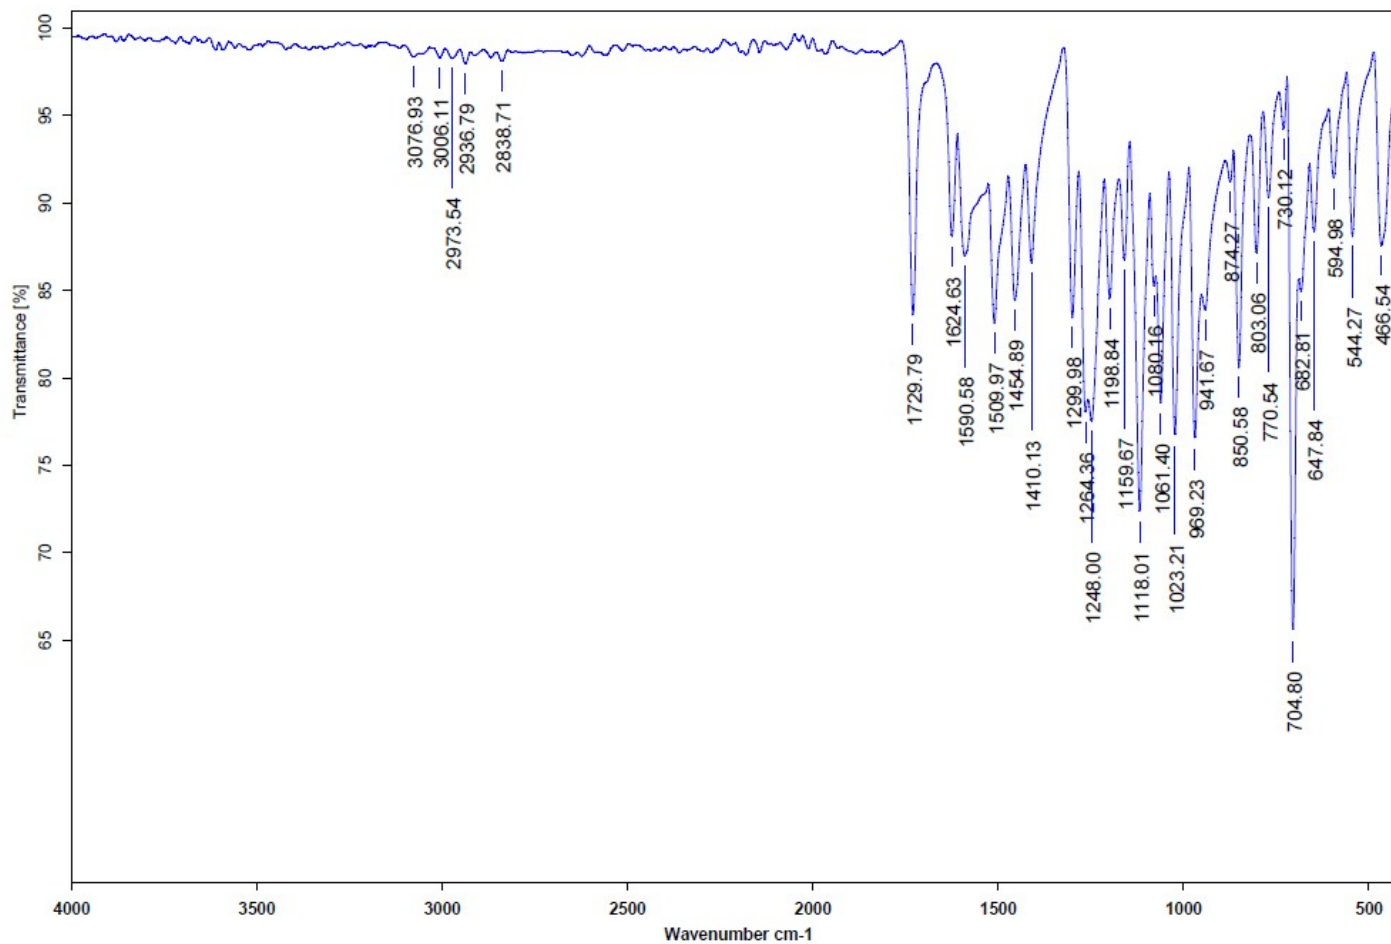

C:\INFRARROJO\AIR-LEP-IQUI-007\_19\DrREnriquez\777.0

Dr.R.Enriquez

Di-BzOC

KBr/Pastilla

RPM

28/05/2019

Fig S43. IR Spectrum of DiBzOC.

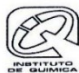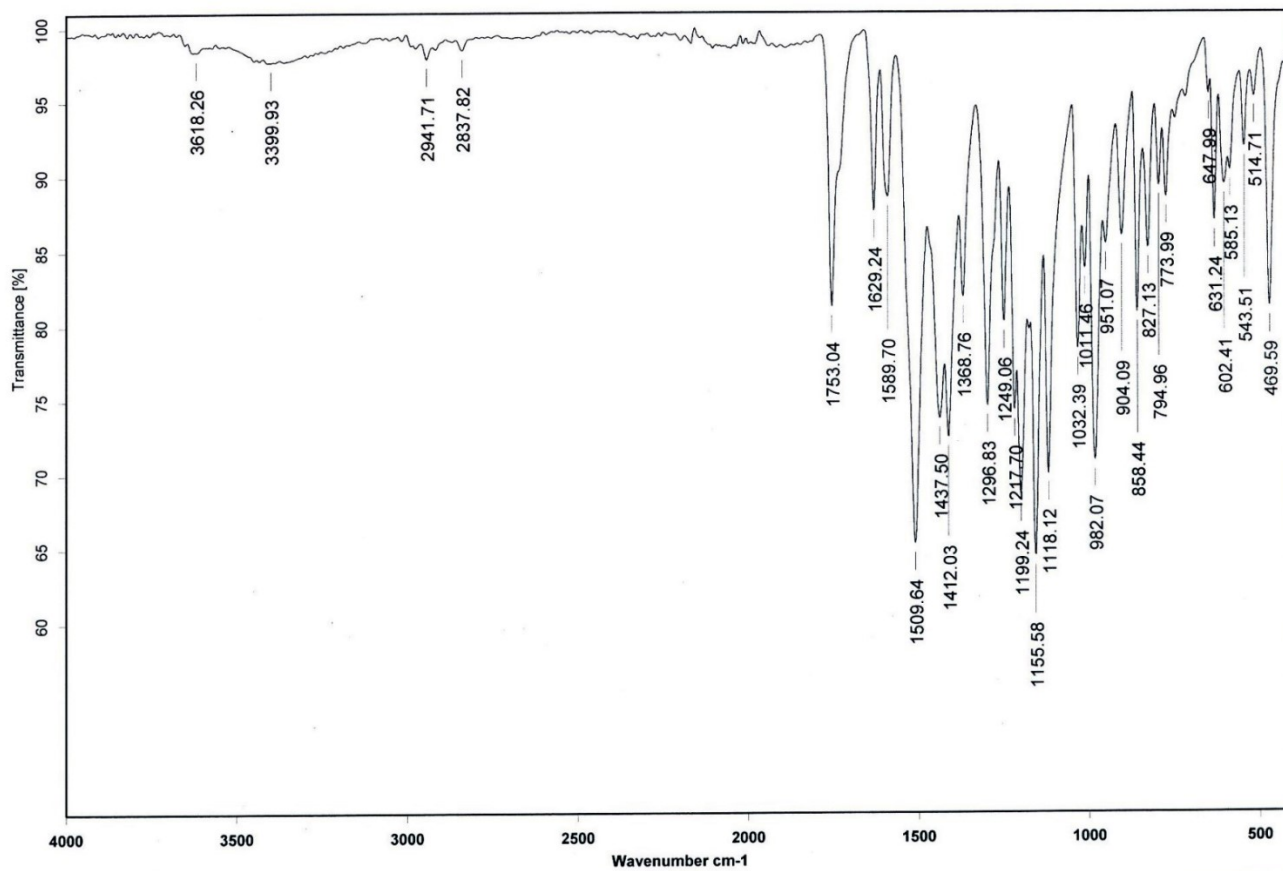

C:\Infrarrojo\AIR-LEP-IQUI-005\_15\1353.0

Dr.R.Enriquez

Co.DAC.Zn 1:0,5

KBr/Pastilla

RPM

30/06/2015

Fig S44. IR Spectrum of DAC-Zn.

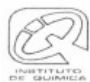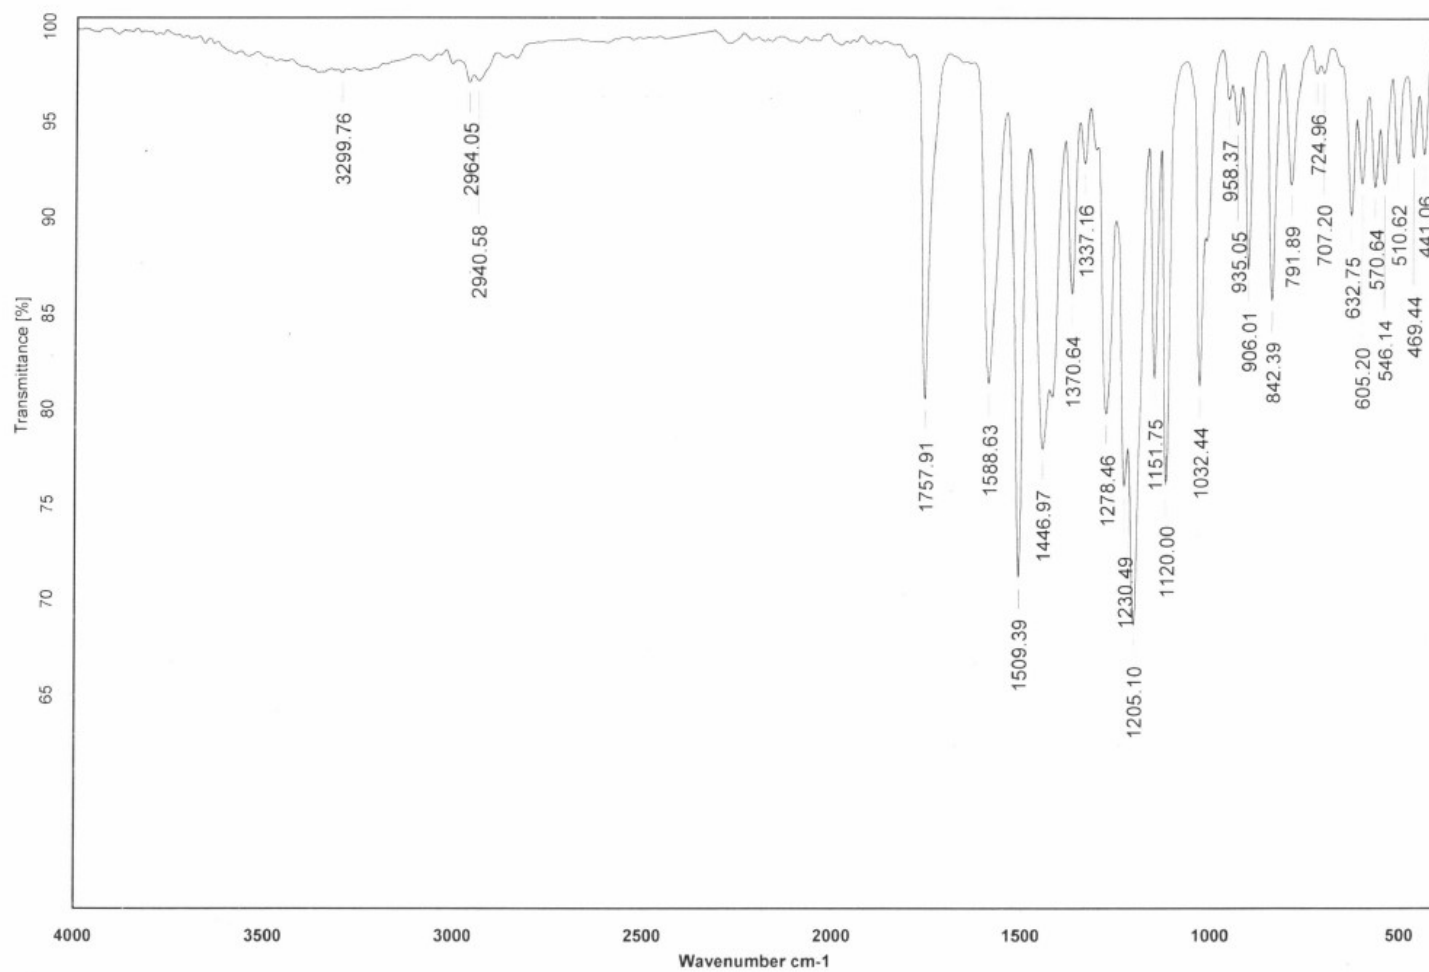

C:\INFRARROJO\AIR-LEP-IQUI-006\_17\DrREnriquez\607.0

Dr.R.Enriquez

DACH-Zn

KBr/Pastilla

R

31/03/2017

Fig S45. IR Spectrum of DACH-Zn.



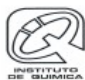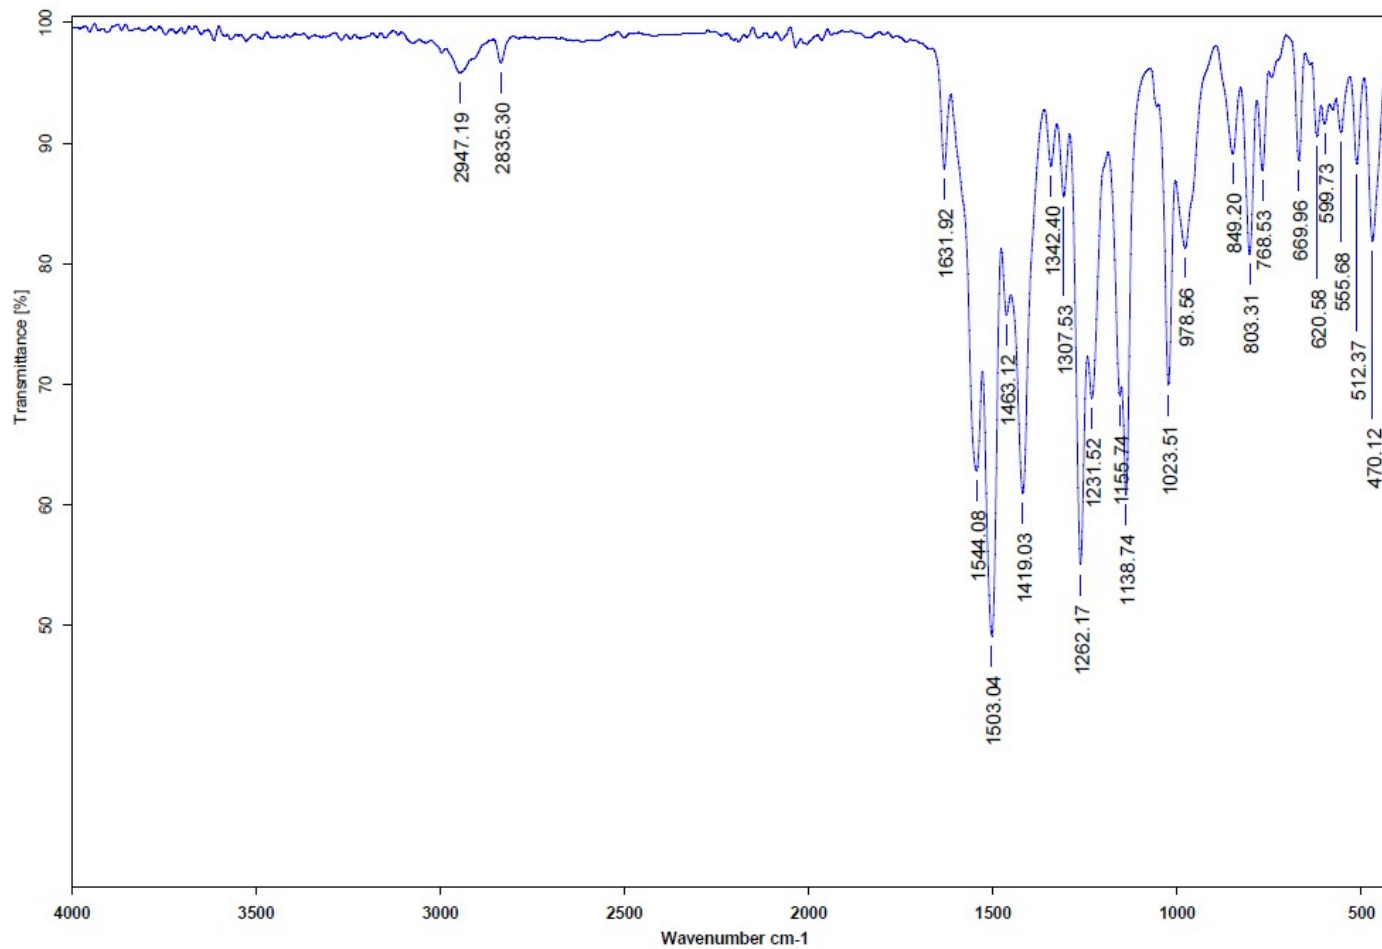

C:\Infrarrojo\AIR-LEP-IQUI-007\_18\Rocio\1517.0

Dr.R.Enriquez

DiMeOC-Zn

KBr/Pastilla

RPM

04/12/2018

Fig S46. IR Spectrum of DiMeOC-Zn.

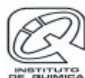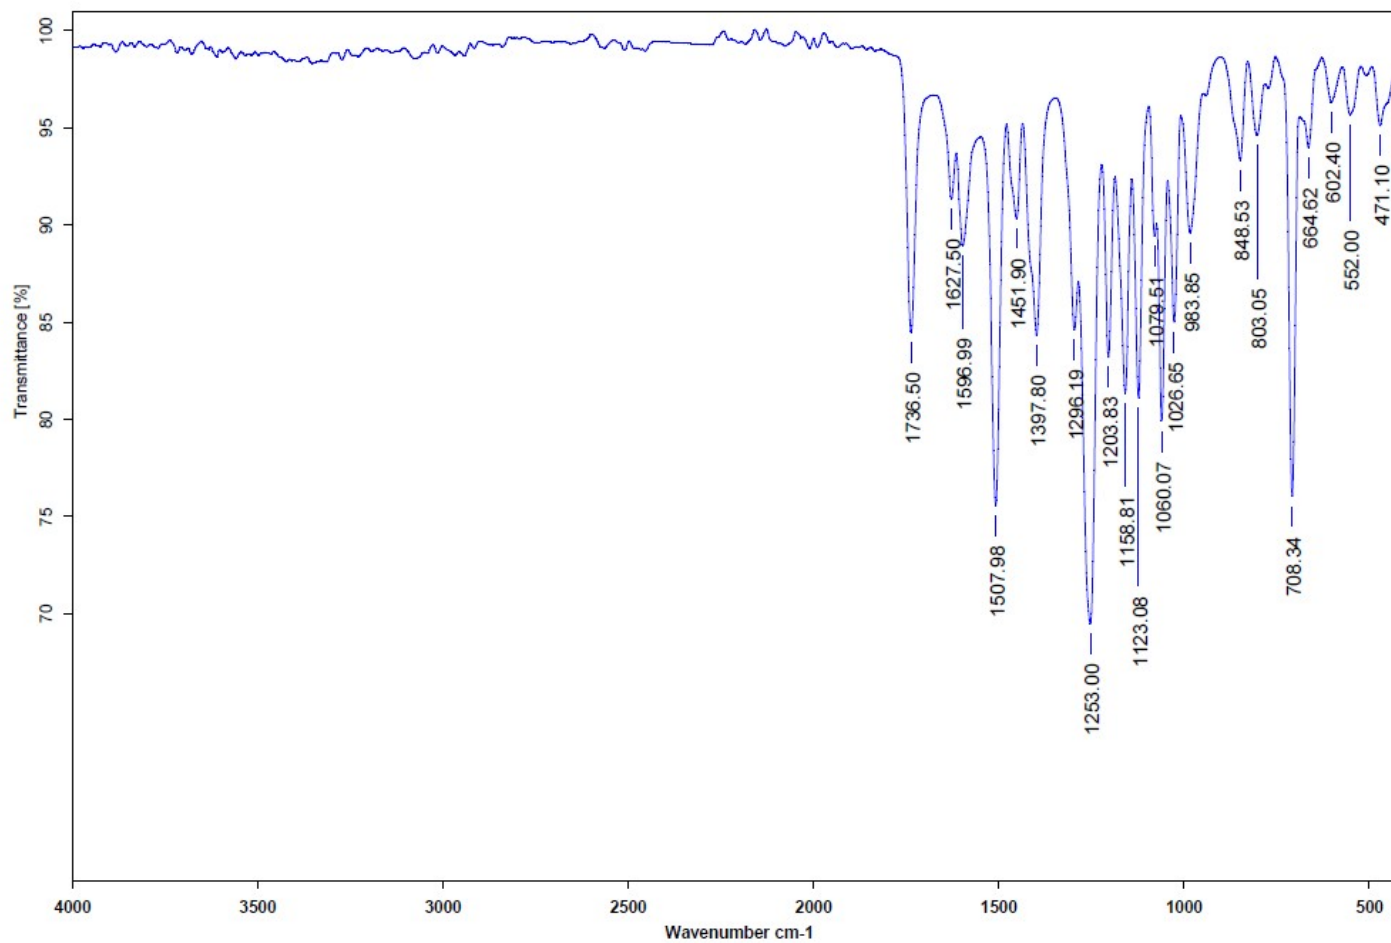

C:\INFRARROJO\AIR-LEP-IQUI-007\_19\DrREnriquez\778.0

Dr.R.Enriquez

Di-BzOC-Zn

KBr/Pastilla

RF

28/05/2019

Fig S47. IR Spectrum of DiBzOC-Zn.

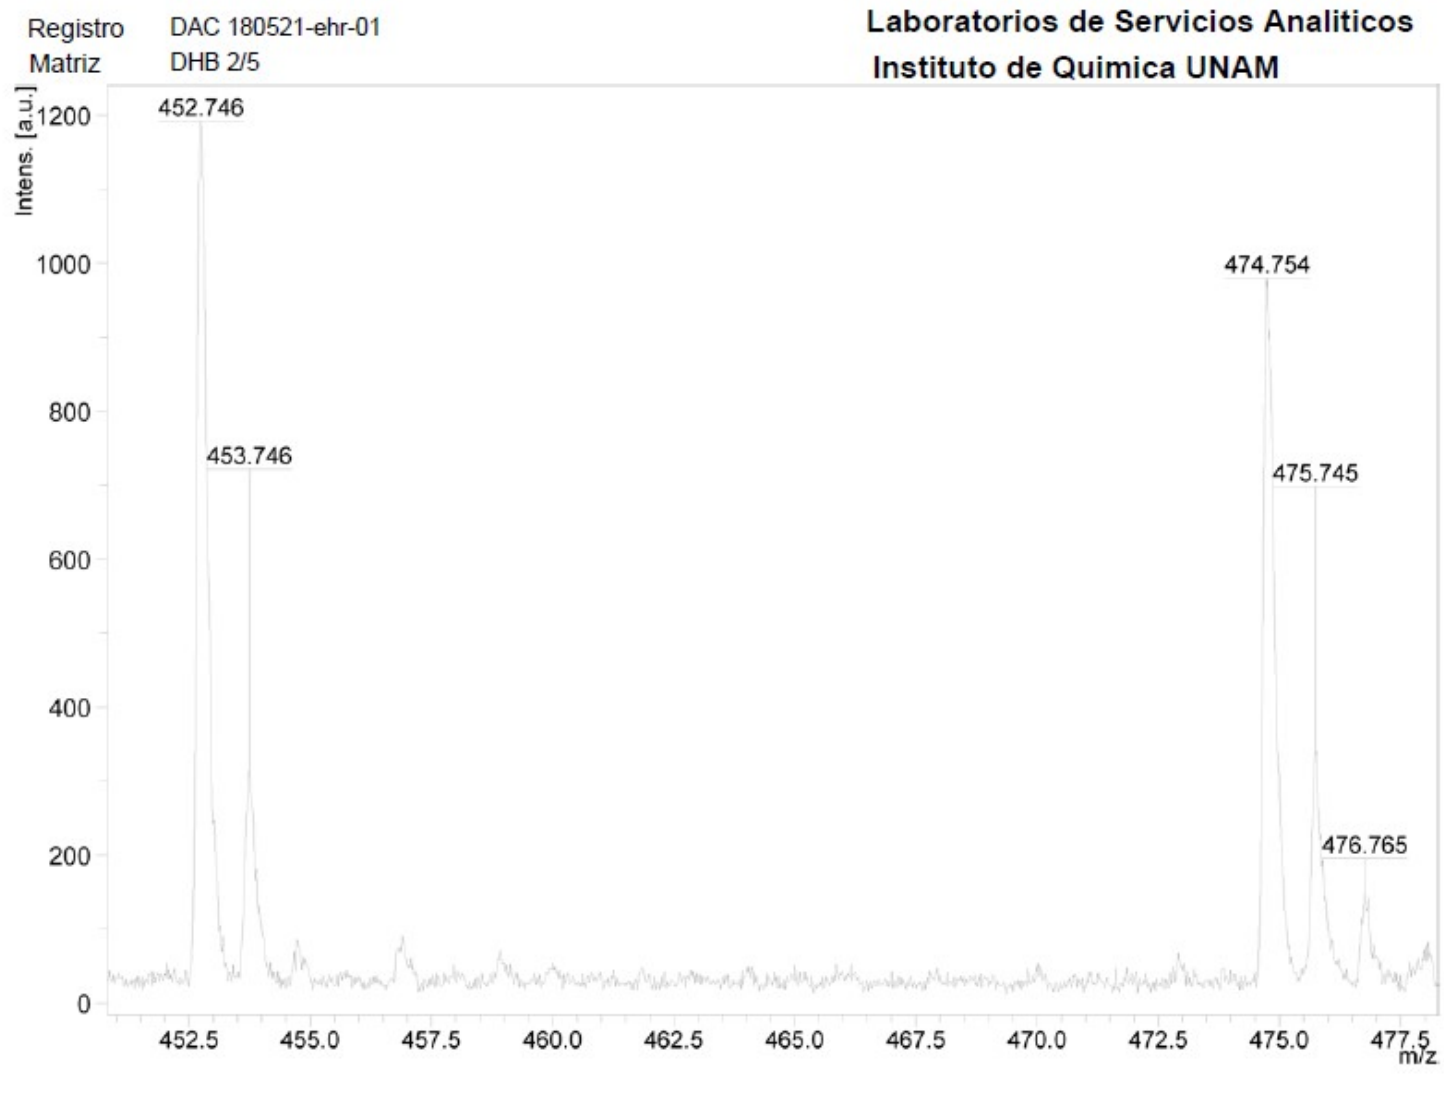

Fig S48. Mass Spectrum of DAC.

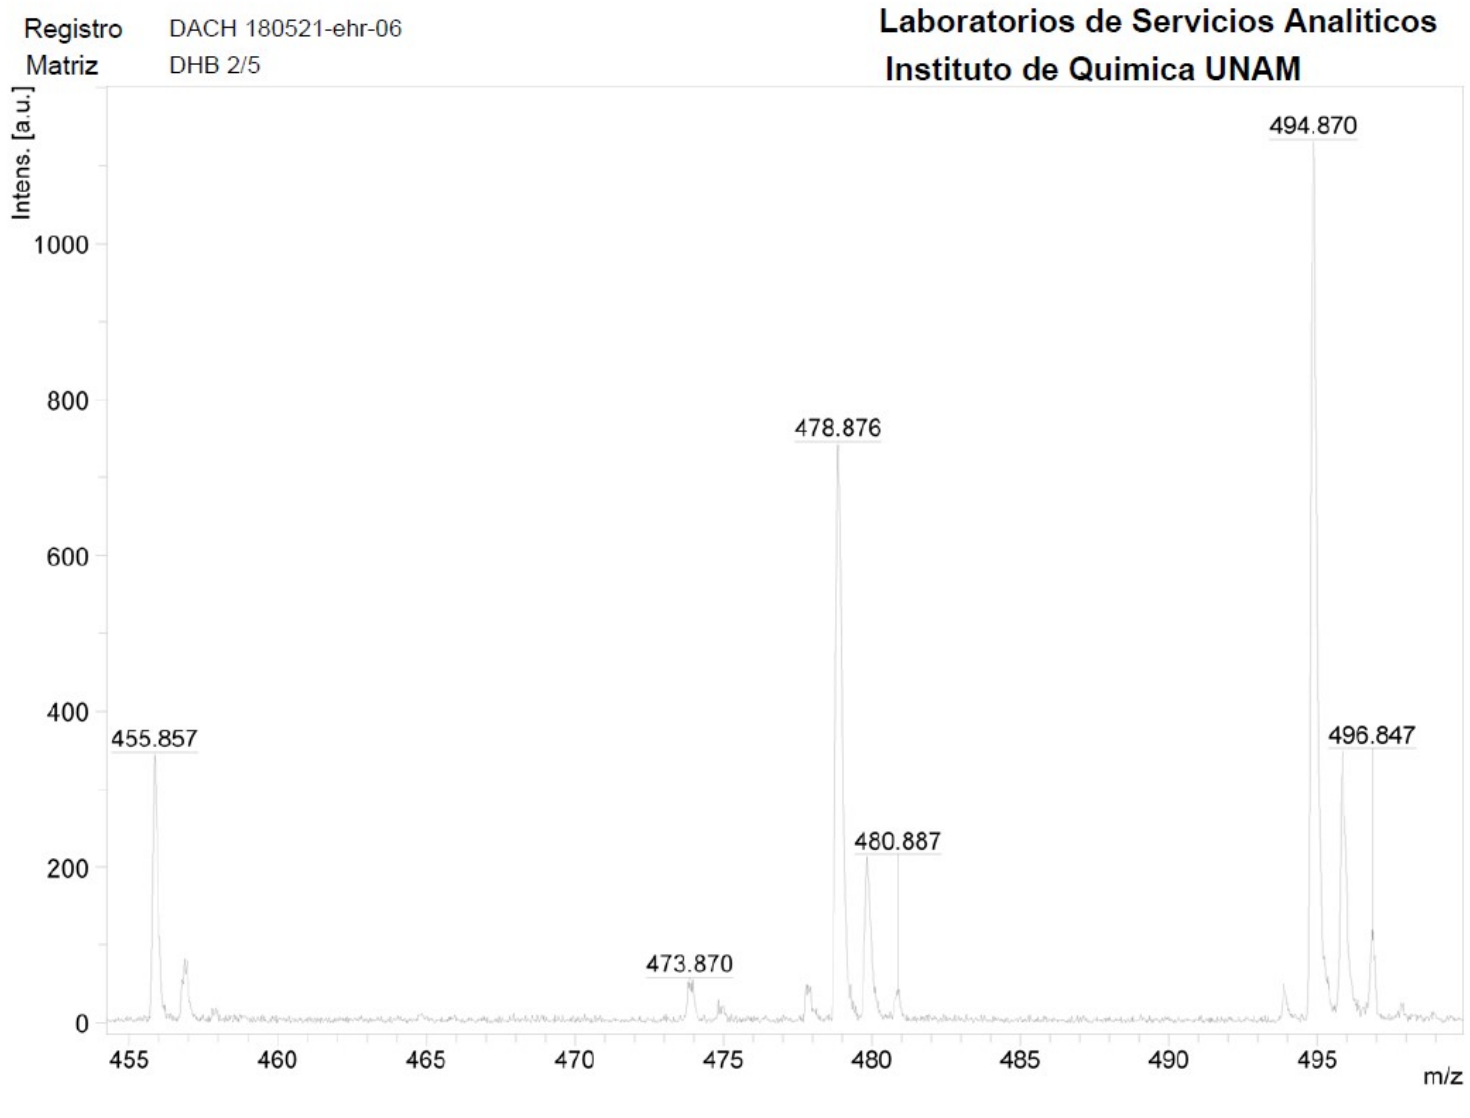

Fig S49. Mass Spectrum of DACH.

Registro DiMeOC 180521-ehr-11  
Matriz DHB 2/5

Laboratorios de Servicios Analíticos  
Instituto de Química UNAM

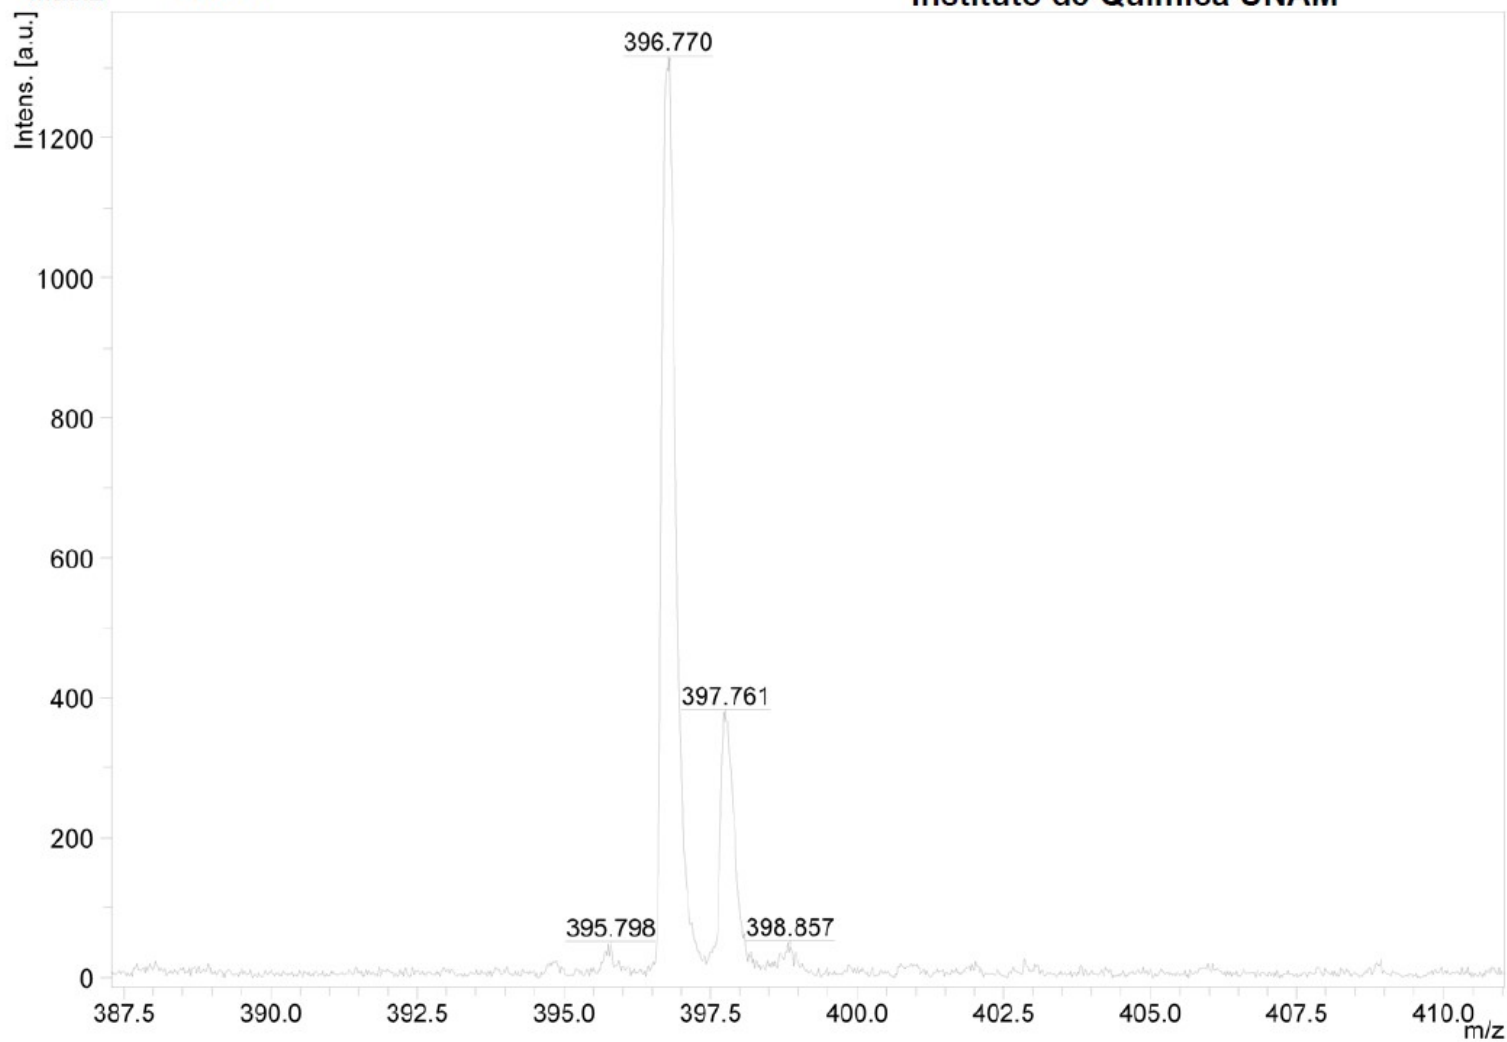

**Fig S50.** Mass Spectrum of DiMeOC.

Registro DiBzOc 180521-ehr-21  
Matriz DHB 2/5

Laboratorios de Servicios Analíticos  
Instituto de Química UNAM

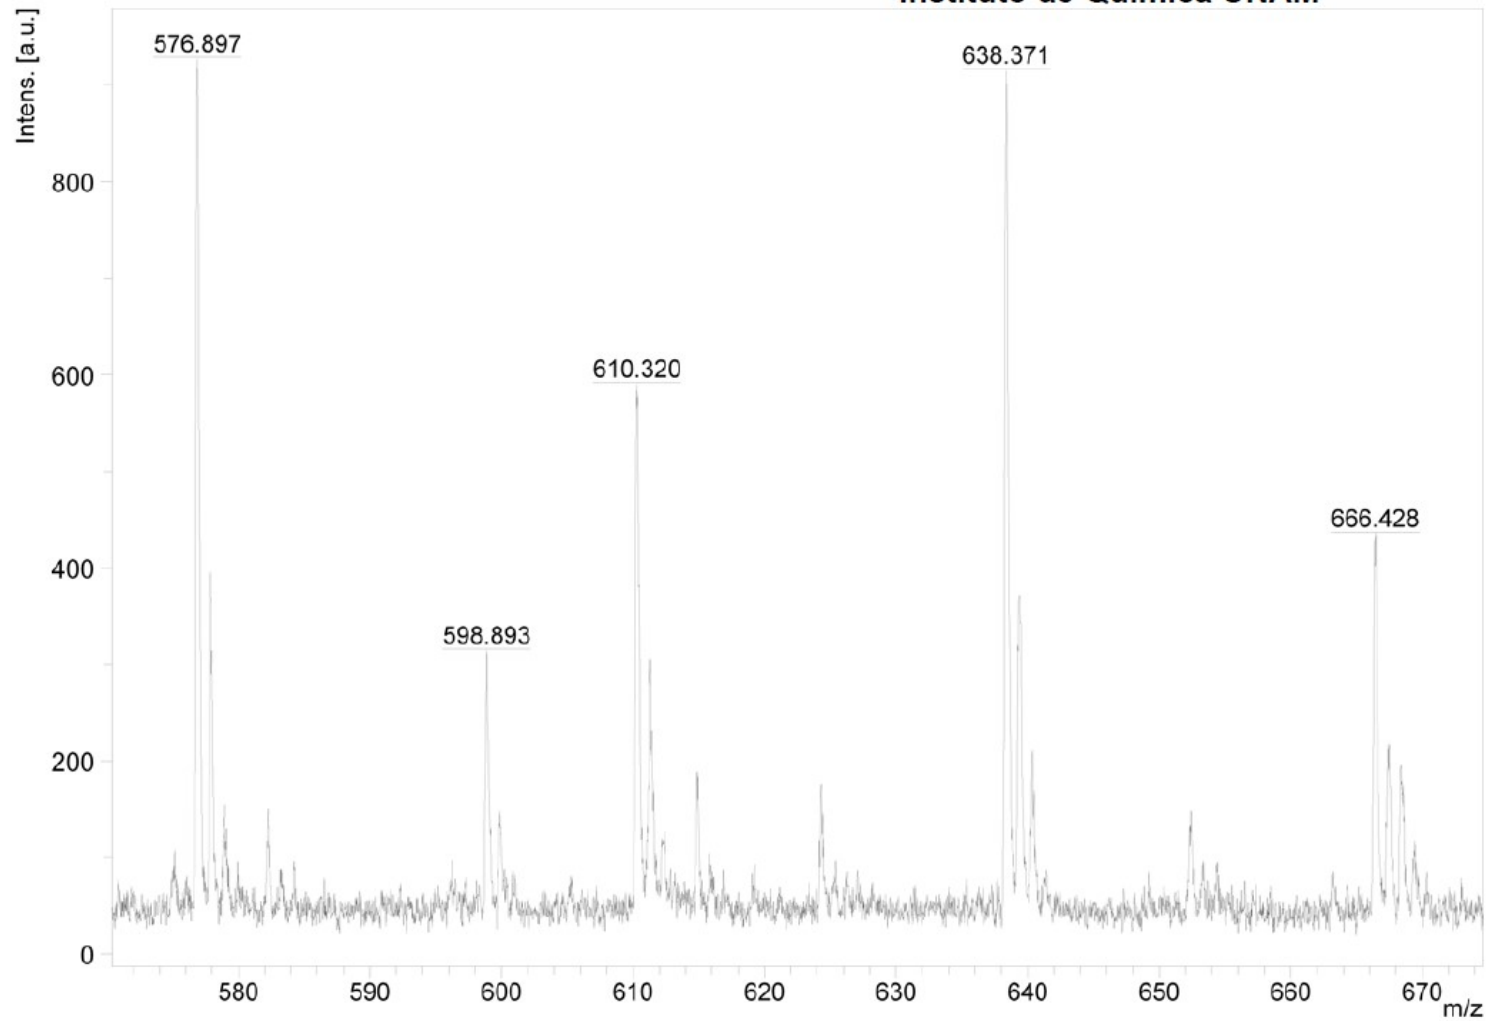

**Fig S51.** Mass Spectrum of DiBzOC.

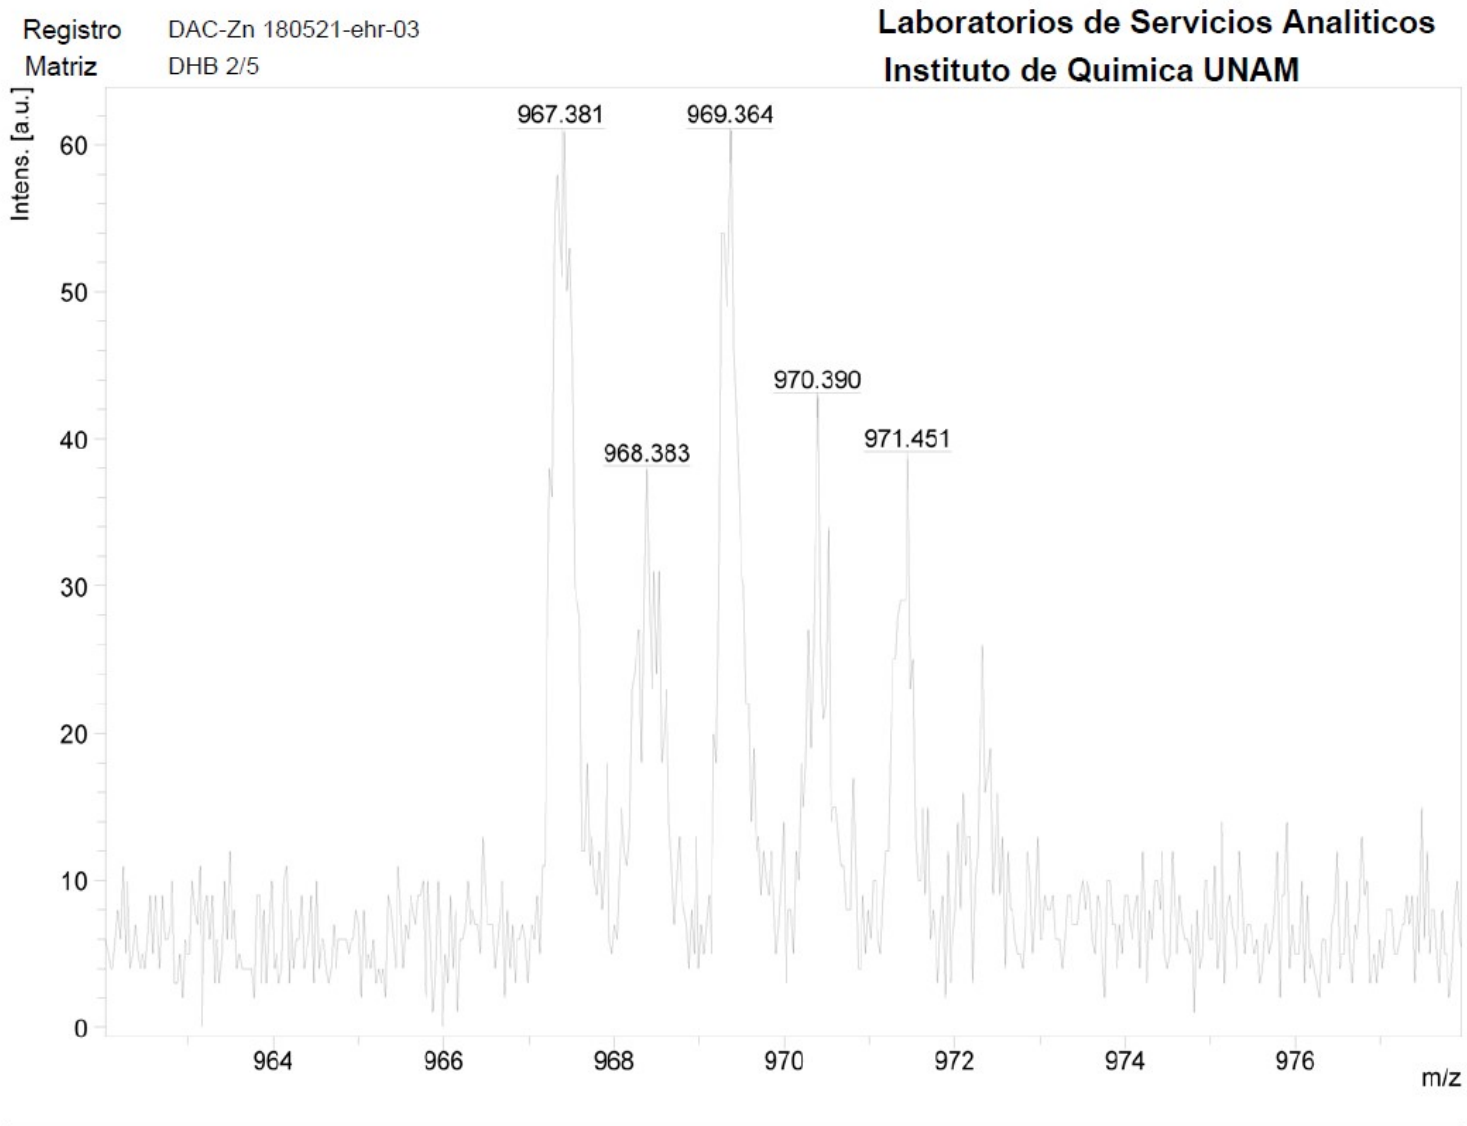

**Fig S52.** Mass Spectrum of DAC-Zn.

Data : Dr Enriquez Raul-151      Date : 29-Jul-2022 15:54  
 Instrument : MStation  
 Sample : 2258\_DACH-Zn  
 Note : Operator name: Carmen Garcia  
 Inlet : Direct      Ion Mode : FAB+  
 RT : 0.58 min      Scan# : (24,31)  
 Elements : C 50/0, H 55/0, O 16/0, Zn 1/0  
 Mass Tolerance : 1000ppm, 10mmu if m/z > 10  
 Unsaturation (U.S.) : 0.0 - 50.0

|   | Observed m/z  | Int%            |      |    |    |    |    |  |
|---|---------------|-----------------|------|----|----|----|----|--|
|   | 975.2803      | 100.00          |      |    |    |    |    |  |
| 1 | Estimated m/z | Err [ppm / mmu] | U.S. | C  | H  | O  | Zn |  |
|   | 975.2782      | +2.2 / +2.1     | 23.5 | 50 | 55 | 16 | 1  |  |

**Fig S53.** Mass Spectrum of DACH-Zn.



Data : Dr Enriquez Raul-149      Date : 06-Feb-2020 09:46  
 Instrument : MStation  
 Sample : 0179 DiMeOC-Zn  
 Note : Operator: Carmen Garcia  
 Inlet : Direct      Ion Mode : FAB+  
 RT : 14.90 min      Scan# : (220,240)  
 Elements : C 46/0, H 50/0, O 12/0, Zn 1/0  
 Mass Tolerance : 1000ppm, 5mmu if m/z > 5  
 Unsaturation (U.S.) : 0.0 - 30.0

|   | Observed m/z  | Int%            |      |    |    |    |    |
|---|---------------|-----------------|------|----|----|----|----|
|   | 855.2322      | 100.00          |      |    |    |    |    |
|   | Estimated m/z | Err [ppm / mmu] | U.S. | C  | H  | O  | Zn |
| 1 | 855.2359      | -4.3 / -3.7     | 23.5 | 46 | 47 | 12 | 1  |

**Fig S54.** Mass Spectrum of DiMeOC-Zn.

Registro DiBzoC-Zn 220608-ehr-02  
Matriz DHB 2/5

Laboratorios de Servicios Analíticos  
Instituto de Química UNAM

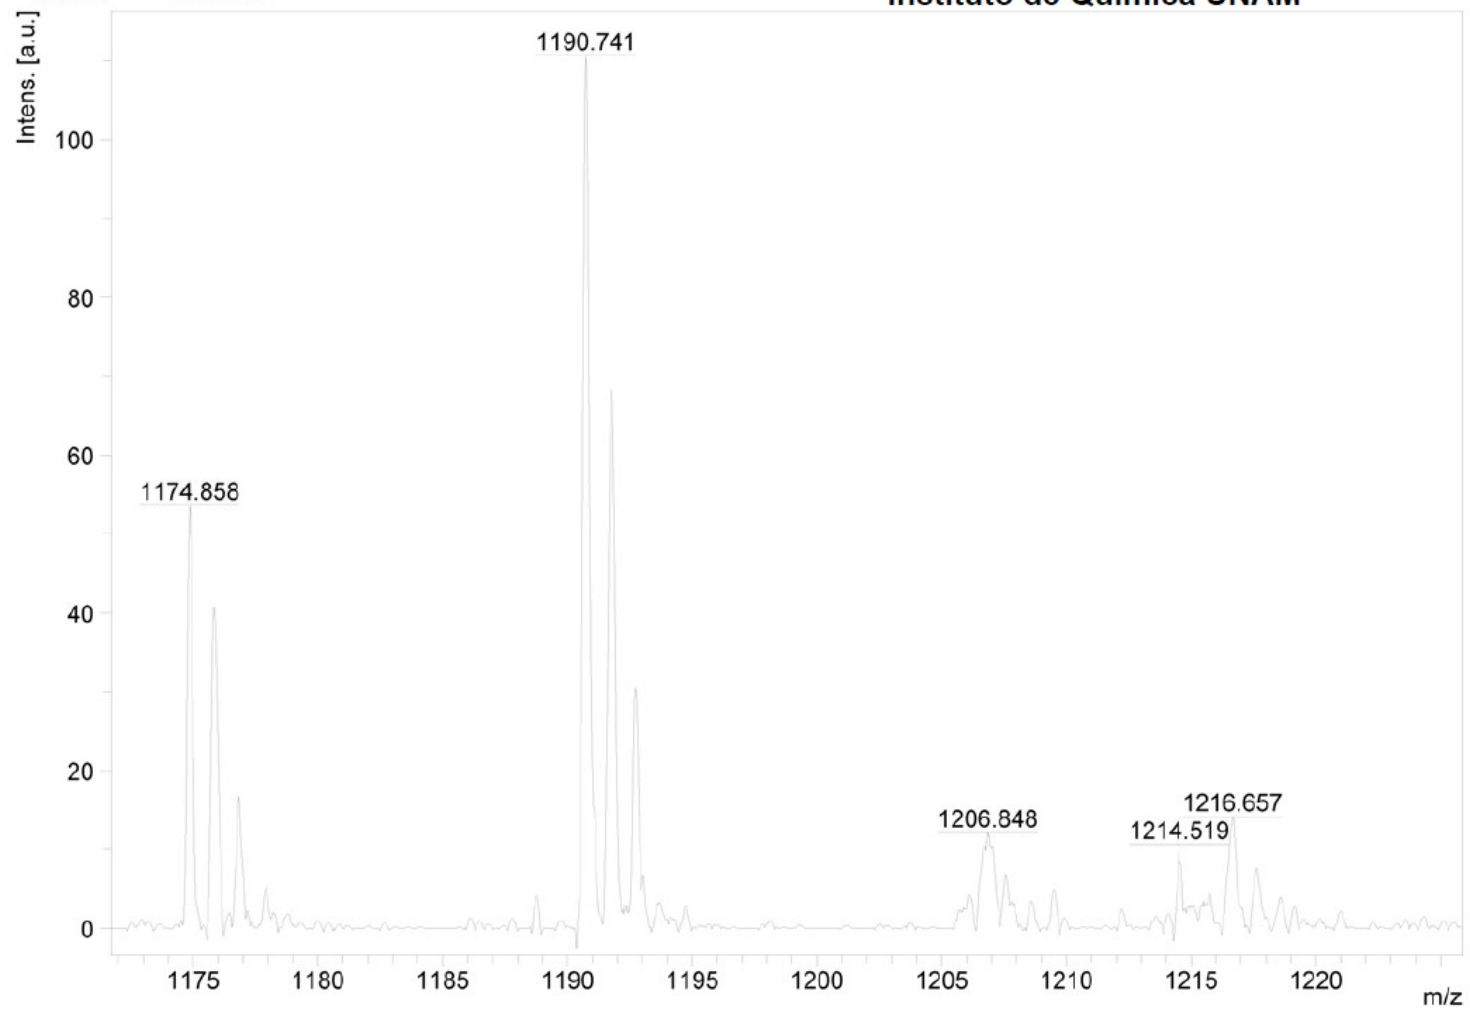

Fig S55. Mass Spectrum of DiBzOC-Zn.
